# Supplementary material for: Deoxygenation of oximes for the synthesis of pyrrolinesviahydroimination cyclization
Source: Royal Society of Chemistry journal article supplement (doi:10.1039/d3ob00072a), 2023-01-01

## Supporting Information

### Deoxygenation of oximes for the synthesis of pyrrolines via hydroimination cyclization

Wencheng Han,<sup>a</sup> Wen-Deng Liu,<sup>a</sup> Junqi Su,<sup>a</sup> and Jiannan Zhao<sup>a,\*</sup>

<sup>a</sup>Zhang Dayu School of Chemistry, Dalian University of Technology, Dalian 116024, P. R. China.

\*E-mail: [jnzhao@dlut.edu.cn](mailto:jnzhao@dlut.edu.cn).

## Table of Contents

|                                                                                         |           |
|-----------------------------------------------------------------------------------------|-----------|
| <b>1. General information .....</b>                                                     | <b>3</b>  |
| <b>2. Substrate preparation.....</b>                                                    | <b>3</b>  |
| <b>2.1 General Procedure 1 (GP1).....</b>                                               | <b>3</b>  |
| <b>2.2 General Procedure 2 (GP2).....</b>                                               | <b>5</b>  |
| <b>2.3 General Procedure 3 (GP3).....</b>                                               | <b>6</b>  |
| <b>2.4 General Procedure 4 (GP4).....</b>                                               | <b>6</b>  |
| <b>2.5 General Procedure 5 (GP5).....</b>                                               | <b>7</b>  |
| <b>2.6 General Procedure 6 (GP6).....</b>                                               | <b>7</b>  |
| <b>2.7 General Procedure 7 (GP7).....</b>                                               | <b>8</b>  |
| <b>2.8 Characterization data of substrates .....</b>                                    | <b>9</b>  |
| <b>3. Deoxygenation of oximes for the synthesis of pyrrolines .....</b>                 | <b>15</b> |
| <b>3.1 Reaction setup.....</b>                                                          | <b>15</b> |
| <b>3.2 General procedure.....</b>                                                       | <b>18</b> |
| <b>3.3 Optimization details .....</b>                                                   | <b>18</b> |
| <b>3.4 Control experiments .....</b>                                                    | <b>22</b> |
| <b>3.5 Gram-scale reaction.....</b>                                                     | <b>23</b> |
| <b>3.6 Gram-scale synthesis in continuous-flow.....</b>                                 | <b>23</b> |
| <b>3.7 Characterization data for all the products .....</b>                             | <b>25</b> |
| <b>3.8 Unsuccessful oximes .....</b>                                                    | <b>32</b> |
| <b>3.9 Further transformation of the products .....</b>                                 | <b>32</b> |
| <b>4. Mechanistic studies .....</b>                                                     | <b>35</b> |
| <b>4.1 Cyclic voltammetry experiments .....</b>                                         | <b>35</b> |
| <b>4.2 Luminescence quenching experiments .....</b>                                     | <b>36</b> |
| <b>4.3 Radical inhibiting experiment .....</b>                                          | <b>39</b> |
| <b>4.4 Radical clock experiments.....</b>                                               | <b>40</b> |
| <b>4.5 Oxidative quenching cycle.....</b>                                               | <b>42</b> |
| <b>5. References.....</b>                                                               | <b>43</b> |
| <b>6. Copy of <sup>1</sup>H NMR, <sup>13</sup>C and <sup>19</sup>F NMR spectra.....</b> | <b>44</b> |

## 1. General information

CH<sub>2</sub>Cl<sub>2</sub> was freshly distilled over CaH prior to use. All other reagents were used as received from commercial sources. PPh<sub>3</sub> and (4-MeOC<sub>6</sub>H<sub>4</sub>)<sub>3</sub>P were purchased from Energy Chemical. (4-MeC<sub>6</sub>H<sub>4</sub>)<sub>3</sub>P and Ph<sub>2</sub>POEt were purchased from Adamas-beta. (4-FC<sub>6</sub>H<sub>4</sub>)<sub>3</sub>P was purchased from Aladdin. Reactions were monitored through thin layer chromatography (TLC) on 0.25-mm silica gel plates and visualized under UV light (254 nm). Flash column chromatography (FCC) was performed using silica gel. NMR spectra were recorded using Bruker Avance II 400 and Vaian DL G400 instruments, calibrated to CD(H)Cl<sub>3</sub> as the internal reference (7.26 and 77.0 ppm for <sup>1</sup>H and <sup>13</sup>C NMR spectra, respectively). <sup>1</sup>H NMR spectral data are reported in terms of chemical shift (δ, ppm), multiplicity, coupling constant (Hz), and integration. <sup>13</sup>C NMR spectral data are reported in terms of chemical shift (δ, ppm). The following abbreviations indicate the multiplicities: s, singlet. d, doublet. t, triplet. q, quartet. m, multiplet. High-resolution mass spectra were obtained using Agilent 6224 TOF LC/MS Mass Spectrometer and Thermo Scientific Q Exactive Plus MS with electrospray ionization (ESI) probe operating in positive ion mode. The fluorescence spectra were measured with Edinburgh Analytical Instruments FLS 920. The photocatalysts 4-CzIPN,<sup>1</sup> [Ru(bpy)<sub>3</sub>]PF<sub>6</sub>,<sup>2</sup> and [Ir(dF(CF<sub>3</sub>)ppy)<sub>2</sub>(dtbbpy)]PF<sub>6</sub><sup>3</sup> were prepared according to previous reports. The oximes **1a**<sup>4</sup>, **1q**<sup>5</sup>, **1s**<sup>4</sup>, **1t**<sup>6</sup> and **1v**<sup>7</sup> were prepared according to previous reports.

## 2. Substrate preparation

### 2.1 General Procedure 1 (GP1)

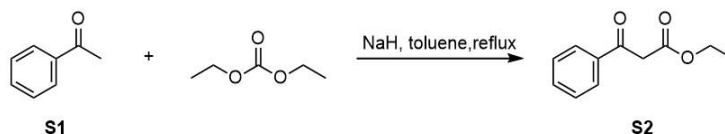

To a dried three-necked flask equipped with a dropping funnel, a condenser, and a magnetic stirrer was added NaH (70 mmol), diethyl carbonate (50 mmol), and toluene (25 mL). The mixture was heated to reflux. A solution of ketone **S1** (25 mmol) in toluene (15 mL) was added dropwise from the dropping funnel over 1-2 h. After the addition, the mixture was heated to reflux until the evolution of hydrogen ceased (15-20 min). When the reaction was cooled to room temperature, glacial acetic acid (8 mL) was added dropwise and a heavy, pasty solid appeared. Ice-water was

added until the solid was dissolved completely. The toluene layer was separated, and the aqueous layer was extracted with EtOAc (50 mL  $\times$  3). The combined organic solution was washed with water (100 mL) and brine (100 mL), then dried over Na<sub>2</sub>SO<sub>4</sub>. After evaporation of the solvent, the mixture was distilled under reduced pressure or subjected chromatography to give the desired  $\beta$ -keto esters **S2** in 32-95% yield.<sup>8</sup>

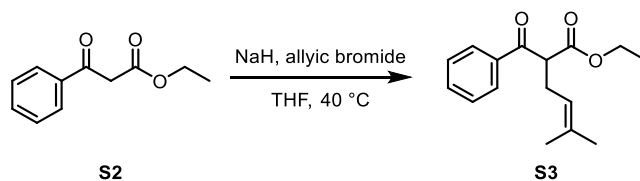

A solution of ethyl benzoylacetate **S2** (20 mmol) in THF (0.17M) was treated with NaH (20 mmol), stirred for 1h and treated with the allylic bromide (22 mmol). The mixture was warmed to 40 °C and stirred overnight. The mixture was cooled to room temperature and MeOH was added. The crude product was purified by column chromatography on silica gel eluting with petroleum ether–Et<sub>2</sub>O (95:5) to give the **S3** in 48-99% yield.<sup>9</sup>

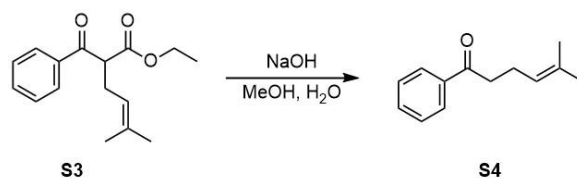

A solution of the  $\beta$ -ketoester **S3** (20 mmol) in MeOH–H<sub>2</sub>O (0.01M, 2:1) was treated with NaOH (80 mmol) and heated under reflux for 2 h. The mixture was cooled to room temperature and the volatiles were removed in vacuo. EtOAc was added and the organic layers were separated. The aqueous layer was then washed with EtOAc (50 mL  $\times$  3) and the combined organic fractions were dried (Na<sub>2</sub>SO<sub>4</sub>), filtered and evaporated. Purification by column chromatography on silica gel, eluting with petroleum ether–Et<sub>2</sub>O (99:1) to give the **S4** in 51-86% yield.<sup>9</sup>

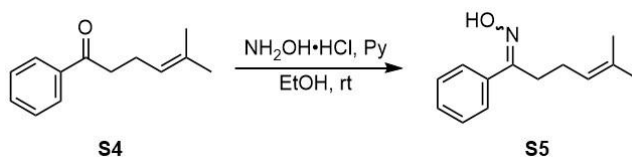

To a stirred solution of **S4** (10 mmol) in EtOH (15 mL), was added hydroxylamine hydrochloride (11 mmol) and pyridine (11 mmol). The reaction mixture was stirred for 2~4 hours at room temperature. Then the reaction was quenched with saturated aqueous NH<sub>4</sub>Cl, extracted with EtOAc (50 mL  $\times$  3). The organic layers were separated and dried over Na<sub>2</sub>SO<sub>4</sub>. Finally, the crude product

was purified by column chromatography on silica gel, eluting with petroleum ether–Et<sub>2</sub>O (20:1) to give the **S5** in 69-92% yield.<sup>9</sup>

Following **GP1**, oximes (**1a–1h**, **1k–1l**, **1q–1s**, **1u–1v**) were synthesized.

## 2.2 General Procedure 2 (GP2)

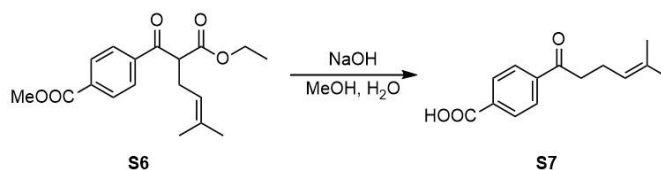

A solution of the  $\beta$ -ketoester **S6** (2 mmol) in MeOH–H<sub>2</sub>O (100 mL, 2:1) was treated with NaOH (8 mmol) and heated under reflux for 2 h. The mixture was cooled to room temperature and the volatiles were removed in vacuo. EtOAc was added and the organic layers were separated. The aqueous layer was then washed with EtOAc (10 mL  $\times$  3) and the combined organic fractions were dried (Na<sub>2</sub>SO<sub>4</sub>), filtered and evaporated. Purification by column chromatography on silica gel, eluting with petroleum ether–Et<sub>2</sub>O (2:1) to give the **S7** in 98% yield.

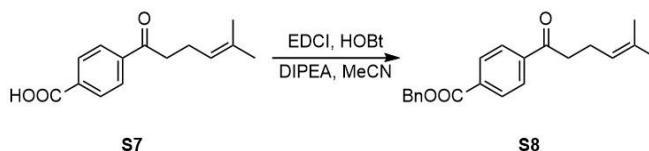

**S7** (2 mmol), EDCI (3 mmol) and HOBT (3 mmol) were dissolved in MeCN at 0 °C. Then DIPEA (3 mmol) and benzyl alcohol (3 mmol) was added. The reaction was stirred at room temperature overnight. The volatiles were removed and the residue was dissolved in DCM. The reaction was quenched by 1N HCl and extracted with DCM. The combined organic fractions were dried (Na<sub>2</sub>SO<sub>4</sub>), filtered and evaporated. Purification by column chromatography on silica gel, eluting with petroleum ether–Et<sub>2</sub>O (99:1) to give the **S8** in 99% yield.

Following **GP1** and **GP2**, oxime (**1j**) was synthesized.

### 2.3 General Procedure 3 (GP3)

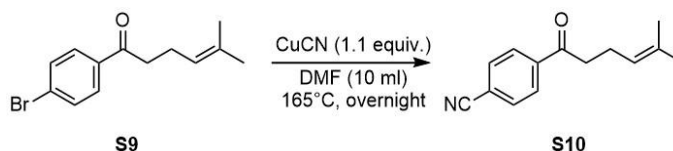

CuCN (11 mmol) was added portionwise to a stirred solution of **S9** (10 mmol) in DMF (10 mL). The resultant suspension was heated at 165 °C overnight. Following cooling, H<sub>2</sub>O and CH<sub>2</sub>Cl<sub>2</sub> were added. The aqueous phase was washed with CH<sub>2</sub>Cl<sub>2</sub> and the combined organic phase was washed with 10% aqueous NaCN solution, dried over Na<sub>2</sub>SO<sub>4</sub> and concentrated in vacuo. Purification of the residue by column chromatography gave **S10** in 35% yield.<sup>4</sup>

Following **GP1** and **GP3**, oxime (**1i**) was synthesized.

### 2.4 General Procedure 4 (GP4)

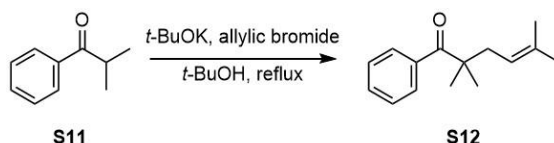

To a solution of **S11** (20 mmol) in anhydrous *t*-BuOH (60 mL) was added *t*-BuOK (100 mmol) and the mixture was stirred at room temperature for 5 minutes. Then, allylic bromide (30 mmol) was added via syringe and the mixture was heated at 90 °C for 16 hours. The mixture was cooled to room temperature and H<sub>2</sub>O was added. The mixture was extracted with EtOAc. The organic extracts were combined, washed with brine, dried over Na<sub>2</sub>SO<sub>4</sub> and concentrated in vacuum. The residue was purified by column chromatography to give **S12** in 66% yield.<sup>10</sup>

Following **GP1** and **GP4**, oxime (**1t**) was synthesized.

## 2.5 General Procedure 5 (GP5)

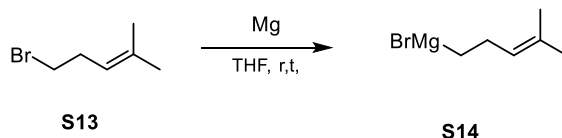

A dry three necked flask equipped with a stirring bar was charged with Mg turnings (0.4 g, 16.5 mmol) and then the flask was evacuated and refilled with N<sub>2</sub> (× 3). Dry THF (2 mL) was added and then **S13** (5 mmol) was added. Once the Grignard reaction started, the remaining **S13** (11.5 mmol) were added as a solution in THF (23 mL). The corresponding mixture was stirred for another hour.

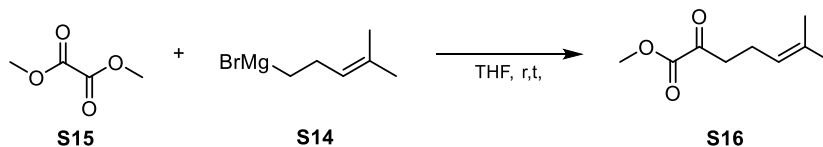

A dry flask equipped with a stirring bar was charged with **S15** (1.18 g, 15 mmol) and then the flask was evacuated and refilled with N<sub>2</sub> (× 3). Dry THF (20 mL) was added and the mixture was cooled to -78 °C. A freshly prepared solution of **S14** (1.05 equiv.) was added by dropwise. The mixture was allowed to warm to room temperature overnight. Then NH<sub>4</sub>Cl was added and the mixture was extracted with Et<sub>2</sub>O (10 mL × 3). The organic extracts were combined, washed with brine, dried over Na<sub>2</sub>SO<sub>4</sub> and concentrated in vacuum. The residue was purified by column chromatography to give **S16** in 25% yield.<sup>9</sup>

Following **GP1** and **GP5**, oxime (**1z**) was synthesized.

## 2.6 General Procedure 6 (GP6)

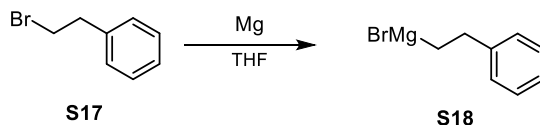

A dry three necked flask equipped with a stirring bar was charged with Mg turnings (0.181 g, 7.45 mmol) and then the flask was evacuated and refilled with N<sub>2</sub> (× 3). Dry THF (2 mL) was added and then **S17** (2 mmol) was added. Once the Grignard reaction started, the remaining **S17** (4.25

mmol) were added as a solution in THF (8.5 mL). The corresponding mixture was stirred for another hour.

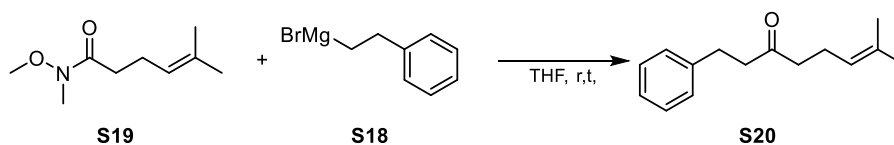

A dry flask equipped with a stirring bar was charged with **S19**<sup>8</sup> (0.856 g, 5 mmol) and then the flask was evacuated and refilled with N<sub>2</sub> (× 3). Dry THF (10 mL) was added and the mixture was cooled to −10 °C. A freshly prepared solution of **S18** (1.25 equiv.) was added by dropwise. The mixture was allowed to warm to room temperature for 1 hour. Then NH<sub>4</sub>Cl was added and the mixture was extracted with Et<sub>2</sub>O (10 mL × 3). The organic extracts were combined, washed with brine, dried over Na<sub>2</sub>SO<sub>4</sub> and concentrated in vacuum. The residue was purified by column chromatography to give **S20** in 90% yield.<sup>11</sup>

Following **GP1** and **GP6**, oxime (**1n–1p**, **1x–1y**) was synthesized.

## 2.7 General Procedure 7 (GP7)

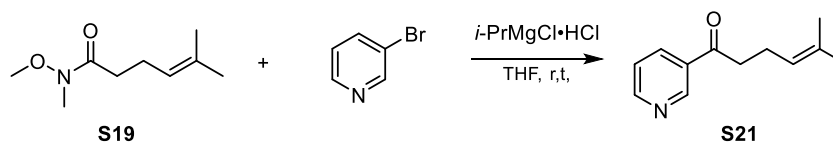

A dry flask equipped with a stirring bar was charged with 3-bromopyridine (0.79 g, 5 mmol) and then the flask was evacuated and refilled with N<sub>2</sub> (× 3). Dry THF (5 mL) was added and the mixture was cooled to 0 °C and *i*-PrMgCl·LiCl (3.85 mL, 5 mmol, 1.3 M in THF) was added by dropwise. The mixture was allowed to stir at 0 °C for 4 hours and then **S19** (5 mmol) was added as a solution in THF (4 ml). The mixture was allowed to warm to room temperature overnight. Then H<sub>2</sub>O (10 ml) was added and the mixture was extracted with Et<sub>2</sub>O (10 mL × 3). The organic extracts were combined, washed with brine, dried over Na<sub>2</sub>SO<sub>4</sub> and concentrated in vacuum. The residue was purified by column chromatography to give **S21** in 48% yield.<sup>11</sup>

Following **GP1** and **GP7**, oxime (**1m**) was synthesized.



## 2.8 Characterization data of substrates

### (*E*)-1-(2-methoxyphenyl)-5-methylhex-4-en-1-one oxime

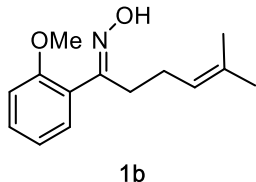

Synthesized according to **GP1**. Colorless oil.  $^1\text{H}$  NMR (400 MHz,  $\text{CDCl}_3$ )  $\delta$  9.40 (br, 1H), 7.33 (t,  $J = 8.0$  Hz, 1H), 7.25 (d,  $J = 7.6$  Hz, 1 H), 6.95 (t,  $J = 7.6$  Hz, 1H), 6.90 (d,  $J = 7.6$  Hz, 1H), 5.07 (t,  $J = 7.2$  Hz, 1H), 3.82 (s, 3H), 2.77 (t,  $J = 8.0$  Hz, 2H), 2.15 (dd,  $J = 15.6, 7.6$  Hz, 2H), 1.63 (s, 3H), 1.51 (s, 3H).  $^{13}\text{C}$  NMR (100 MHz,  $\text{CDCl}_3$ )  $\delta$  160.4, 157.4, 132.2, 130.1, 130.0, 125.9, 123.8, 120.6, 110.8, 55.4, 28.5, 25.7, 24.3, 17.6. HRMS-ESI: calcd for  $\text{C}_{14}\text{H}_{20}\text{NO}_2^+$  ( $[\text{M} + \text{H}^+]$ )  $m/z$  234.1489, found 234.1480.

### (*E*)-1-(3-methoxyphenyl)-5-methylhex-4-en-1-one oxime

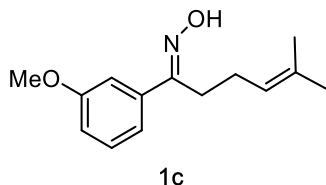

Synthesized according to **GP1**. White solid, m.p. = 45.9 – 46.5 °C.  $^1\text{H}$  NMR (400 MHz,  $\text{CDCl}_3$ )  $\delta$  9.00 (br, 1H), 7.33 – 7.27 (m, 1H), 7.23 – 7.12 (m, 2H), 6.92 (d,  $J = 7.2$  Hz, 1H), 5.18 (t,  $J = 6.8$  Hz, 1H), 3.83 (s, 3H), 2.80 (t,  $J = 8.0$  Hz, 2H), 2.26 (dd,  $J = 15.6, 7.6$  Hz, 2H), 1.67 (s, 3H), 1.58 (s, 3H).  $^{13}\text{C}$  NMR (100 MHz,  $\text{CDCl}_3$ )  $\delta$  159.7, 159.5, 137.3, 132.8, 129.5, 123.3, 118.9, 115.0, 111.6, 55.3, 26.6, 25.7, 24.9, 17.7. HRMS-ESI: calcd for  $\text{C}_{14}\text{H}_{20}\text{NO}_2^+$  ( $[\text{M} + \text{H}^+]$ )  $m/z$  234.1489, found 234.1483.

### (*E*)-1-(4-methoxyphenyl)-5-methylhex-4-en-1-one oxime

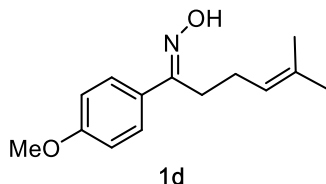

Synthesized according to **GP1**. White solid, m.p. = 82.6 – 83.6 °C.  $^1\text{H}$  NMR (400 MHz,  $\text{CDCl}_3$ )  $\delta$  8.75 (s, 1H), 7.56 (d,  $J = 8.8$  Hz, 2H), 6.91 (d,  $J = 8.8$  Hz, 2H), 5.18 (t,  $J = 7.2$  Hz, 1H), 3.83 (s, 3H), 2.79 (t,  $J = 8.0$  Hz, 2H), 2.26 (dd,  $J = 15.6, 7.6$  Hz, 2H), 1.67 (s, 3H), 1.58 (s, 3H).  $^{13}\text{C}$  NMR (100 MHz,  $\text{CDCl}_3$ )  $\delta$  160.4, 159.1, 132.7, 128.3, 127.7, 123.4, 113.9, 55.3, 26.4, 25.6, 25.0, 17.7. HRMS-ESI: calcd for  $\text{C}_{14}\text{H}_{20}\text{NO}_2^+$  ( $[\text{M} + \text{H}^+]$ )  $m/z$  234.1489, found 234.1485.

**(E)-5-methyl-1-(p-tolyl)hex-4-en-1-one oxime**

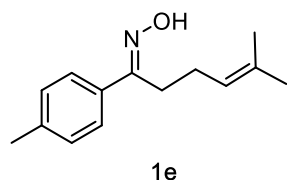

Synthesized according to **GP1**. White solid, m.p. = 49.2 – 49.9 °C. <sup>1</sup>H NMR (400 MHz, CDCl<sub>3</sub>) δ 9.76 (s, 1H), 7.50 (d, *J* = 8.0 Hz, 2H), 7.18 (d, *J* = 8.0 Hz, 2H), 5.18 (t, *J* = 7.2 Hz, 1H), 2.81 (t, *J* = 8.0 Hz, 2H), 2.35 (s, 3H), 2.26 (dd, *J* = 15.6, 7.6 Hz, 2H), 1.66 (s, 3H), 1.57 (s, 3H). <sup>13</sup>C NMR (100 MHz, CDCl<sub>3</sub>) δ 159.3, 139.2, 133.0, 132.7, 129.3, 126.3, 123.4, 26.6, 25.7, 24.9, 21.3, 17.7. HRMS-ESI: calcd for C<sub>14</sub>H<sub>20</sub>NO<sup>+</sup> ([M + H<sup>+</sup>]) *m/z* 218.1539, found 218.1539.

**(E)-1-(4-chlorophenyl)-5-methylhex-4-en-1-one oxime**

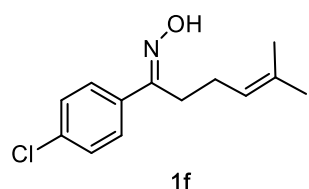

Synthesized according to **GP1**. White solid, m.p. = 84.1 – 85.5 °C. <sup>1</sup>H NMR (400 MHz, CDCl<sub>3</sub>) δ 8.48 (s, 1H), 7.54 (d, *J* = 8.8 Hz, 2H), 7.35 (d, *J* = 8.8 Hz, 2H), 5.15 (t, *J* = 7.2 Hz, 1H), 2.79 (t, *J* = 8.0 Hz, 2H), 2.24 (dd, *J* = 15.6, 7.6 Hz, 2H), 1.66 (s, 3H), 1.56 (s, 3H). <sup>13</sup>C NMR (100 MHz, CDCl<sub>3</sub>) δ 158.8, 135.2, 134.3, 133.0, 128.7, 127.6, 123.0, 26.3, 25.6, 24.8, 17.7. HRMS-ESI: calcd for C<sub>13</sub>H<sub>17</sub>ClNO<sup>+</sup> ([M + H<sup>+</sup>]) *m/z* 238.0993, found 238.0985.

**(E)-1-(4-bromophenyl)-5-methylhex-4-en-1-one oxime**

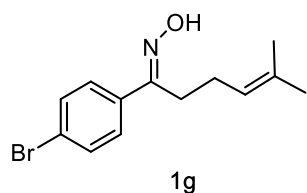

Synthesized according to **GP1**. White solid, m.p. = 101.0 – 102.3 °C. <sup>1</sup>H NMR (400 MHz, CDCl<sub>3</sub>) δ 8.53 (s, 1H), 7.60 – 7.42 (m, 4H), 5.15 (t, *J* = 7.2 Hz, 1H), 2.79 (t, *J* = 8.0 Hz, 2H), 2.24 (dd, *J* = 15.6, 7.6 Hz, 2H), 1.66 (s, 3H), 1.56 (s, 3H). <sup>13</sup>C NMR (100 MHz, CDCl<sub>3</sub>) δ 158.8, 134.7, 133.0, 131.7, 127.9, 123.5, 123.0, 26.3, 25.7, 24.8, 17.7. HRMS-ESI: calcd for C<sub>13</sub>H<sub>17</sub>BrNO<sup>+</sup> ([M + H<sup>+</sup>]) *m/z* 282.0488, found 282.0482.

**(E)-5-methyl-1-(4-(trifluoromethyl)phenyl)hex-4-en-1-one oxime**

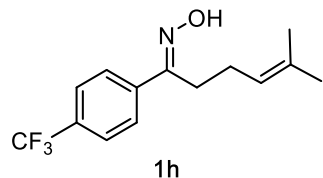

Synthesized according to **GP1**. White solid, m.p. = 83.2 – 84.2 °C. <sup>1</sup>H NMR (400 MHz, CDCl<sub>3</sub>) δ 9.84 (s, 1H), 7.71 (d, *J* = 8.4 Hz, 2H), 7.64 (d, *J* = 8.4 Hz, 2H), 5.15 (t, *J* = 6.8 Hz, 1H), 2.85 (t, *J* = 8.0 Hz, 2H), 2.27 (dd, *J* = 15.2, 7.6 Hz, 2H), 1.65 (s, 3H), 1.55 (s, 3H). <sup>13</sup>C NMR

(100 MHz, CDCl<sub>3</sub>)  $\delta$  158.8, 139.3, 133.2, 131.1 (q,  $J = 32.7$  Hz), 126.7, 125.5 (q,  $J = 3.6$  Hz), 124.0 (q,  $J = 270.4$  Hz), 122.9, 26.5, 25.6, 24.9, 17.6. <sup>19</sup>F NMR (376 MHz, CDCl<sub>3</sub>)  $\delta$  62.75. HRMS-ESI: calcd for C<sub>14</sub>H<sub>17</sub>F<sub>3</sub>NO<sub>3</sub><sup>+</sup> ([M + H<sup>+</sup>])  $m/z$  272.1257, found 272.1251.

**(E)-4-(1-(hydroxyimino)-5-methylhex-4-en-1-yl)benzonitrile**

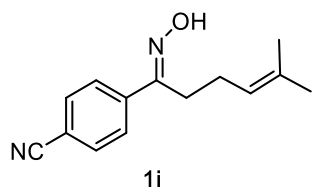

Synthesized according to **GP1** and **GP3**. White solid, m.p. = 56.3 – 58.0 °C. <sup>1</sup>H NMR (400 MHz, CDCl<sub>3</sub>)  $\delta$  9.07 (d,  $J = 7.6$  Hz, 1H), 7.62 (q,  $J = 8.4$  Hz, 4H), 5.05 (t,  $J = 7.2$  Hz, 1H), 2.75 (t,  $J = 8.0$  Hz, 2H), 2.27 (dd,  $J = 15.2, 7.6$  Hz, 2H), 1.57 (s, 3H), 1.47 (s, 3H). <sup>13</sup>C NMR (100 MHz, CDCl<sub>3</sub>)  $\delta$  158.4, 140.2, 133.3, 132.3, 126.9, 122.7, 118.6, 112.6, 26.2, 25.6, 24.7, 17.7. HRMS-ESI: calcd for C<sub>14</sub>H<sub>17</sub>N<sub>2</sub>O<sup>+</sup> ([M + H<sup>+</sup>])  $m/z$  229.1335, found 229.1330.

**benzyl (E)-4-(1-(hydroxyimino)-5-methylhex-4-en-1-yl)benzoate**

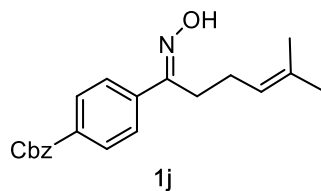

Synthesized according to **GP1** and **GP2**. White solid, m.p. = 80.6 – 81.8 °C. <sup>1</sup>H NMR (400 MHz, CDCl<sub>3</sub>)  $\delta$  9.54 (br, 1H), 8.13 (d,  $J = 8.4$  Hz, 2H), 7.71 (d,  $J = 8.4$  Hz, 2H), 7.49 (d,  $J = 6.8$  Hz, 2H), 7.47 – 7.30 (m, 3H), 5.42 (s, 2H), 5.19 (t,  $J = 6.4$  Hz, 1H), 2.88 (t,  $J = 7.6$  Hz, 2H), 2.30 (dd,  $J = 15.2, 7.6$  Hz, 2H), 1.69 (s, 3H), 1.59 (s, 3H). <sup>13</sup>C NMR (100 MHz, CDCl<sub>3</sub>)  $\delta$  166.2, 158.9, 140.4, 136.0, 133.0, 130.5, 130.0, 128.7, 128.3, 128.2, 126.4, 123.0, 66.9, 26.4, 25.7, 24.8, 17.7. HRMS-ESI: calcd for C<sub>21</sub>H<sub>24</sub>NO<sub>3</sub><sup>+</sup> ([M + H<sup>+</sup>])  $m/z$  338.1751, found 338.1742.

**(E)-5-methyl-1-(naphthalen-2-yl)hex-4-en-1-one oxime**

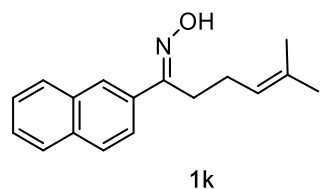

Synthesized according to **GP1**. White solid, m.p. = 137.6 – 138.8 °C. <sup>1</sup>H NMR (400 MHz, CDCl<sub>3</sub>)  $\delta$  8.73 (s, 1H), 8.02 (s, 1H), 7.92 – 7.77 (m, 4H), 7.56 – 7.44 (m, 2H), 5.24 (t,  $J = 7.2$  Hz, 1H), 2.94 (t,  $J = 8.0$  Hz, 2H), 2.34 (dd,  $J = 15.6, 7.6$  Hz, 2H), 1.68 (s, 3H), 1.59 (s, 3H). <sup>13</sup>C NMR (100 MHz, CDCl<sub>3</sub>)  $\delta$  159.6, 133.7, 133.2, 133.1, 132.9, 128.5,

128.2, 127.7, 126.7, 126.4, 126.1, 123.7, 123.3, 26.3, 25.7, 25.1, 17.7. HRMS-ESI: calcd for  $C_{17}H_{19}NO^+$  ( $[M + H^+]$ )  $m/z$  254.1539, found 254.1542.

### (*E*)-5-methyl-1-(thiophen-2-yl)hex-4-en-1-one oxime

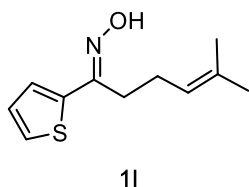

Synthesized according to **GP1**. White solid, m.p. = 60.1 – 60.7 °C.  $^1H$  NMR (400 MHz,  $CDCl_3$ )  $\delta$  8.47 (s, 1H), 7.28 (d,  $J = 5.2$  Hz, 1H), 7.25 (d,  $J = 3.6$  Hz, 1H), 7.03 (dd,  $J = 5.2, 3.6$  Hz, 1H), 5.22 (t,  $J = 7.2$  Hz, 1H), 2.80 (t,  $J = 8.0$  Hz, 2H), 2.34 (dd,  $J = 15.6, 7.6$  Hz, 2H), 1.68 (s, 3H), 1.62 (s, 3H).  $^{13}C$  NMR (100 MHz,  $CDCl_3$ )  $\delta$  155.4, 139.7, 133.0, 127.2, 126.8, 126.4, 123.1, 27.1, 25.7, 25.2, 17.7. HRMS-ESI: calcd for  $C_{11}H_{16}NOS^+$  ( $[M + H^+]$ )  $m/z$  210.0947, found 210.0956.

### 5-methyl-1-(pyridin-3-yl)hex-4-en-1-one oxime

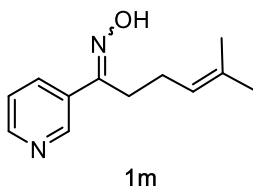

Synthesized according to **GP1** and **GP7**. Colorless oil,  $E:Z = 70:30$ .  $^1H$  NMR (400 MHz,  $CDCl_3$ )  $\delta$  10.48 (s, 0.7H), 9.99 (s, 0.3H), 8.92 (s, 0.7H), 8.75 (s, 0.3H), 8.66 – 8.51 (m, 1H), 7.94 (d,  $J = 8.0$  Hz, 0.7H), 7.84 (d,  $J = 8.0$  Hz, 0.3H), 7.38 (dd,  $J = 8.0, 4.8$  Hz, 0.3H), 7.32 (dd,  $J = 8.0, 4.8$  Hz, 0.7H), 5.17 (t,  $J = 7.2$  Hz, 0.7H), 5.09 (t,  $J = 7.2$  Hz, 0.3H), 2.84 (t,  $J = 7.6$  Hz, 1.4H), 2.62 (t,  $J = 7.6$  Hz, 0.6H), 2.29 (dd,  $J = 15.2, 7.6$  Hz, 1.4H), 2.17 (dd,  $J = 15.2, 7.6$  Hz, 0.6H), 1.66 (s, 3H), 1.57 (s, 2.1H), 1.50 (s, 0.9H).  $^{13}C$  NMR (100 MHz,  $CDCl_3$ )  $\delta$  156.6, 154.9, 149.4, 149.3, 148.8, 147.5, 136.2, 133.9, 133.1, 133.0, 132.3, 129.7, 123.4, 123.2, 123.0, 122.5, 35.0, 26.0, 25.7, 25.6, 25.3, 24.7, 17.7, 17.7. HRMS-ESI: calcd for  $C_{12}H_{17}N_2O^+$  ( $[M + H^+]$ )  $m/z$  205.1335, found 205.1337.

### 1-cyclohexyl-5-methylhex-4-en-1-one oxime

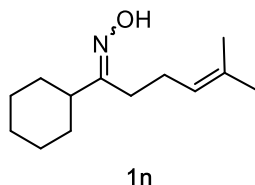

Synthesized according to **GP1** and **GP6**. Colorless oil, *E:Z* = 80:20.  $^1\text{H}$  NMR (400 MHz,  $\text{CDCl}_3$ )  $\delta$  9.63 (s, 1H), 5.22 – 5.06 (m, 1H), 3.25 – 3.07 (m, 0.2H), 2.40 – 2.28 (m, 1.8H), 2.26 – 2.08 (m, 3H), 1.87 – 1.74 (m, 4H), 1.72 – 1.65 (m, 4H), 1.63 (s, 2.4H), 1.61 (s, 0.6H), 1.34 – 1.15 (m, 5H).  $^{13}\text{C}$  NMR (100 MHz,  $\text{CDCl}_3$ )  $\delta$  164.6, 163.9, 132.3, 132.3, 123.8, 123.6, 43.9, 36.8, 30.9, 30.3, 28.9, 27.4, 26.3, 26.2, 26.1, 26.1, 25.7, 24.9, 24.5, 17.7, 17.7. HRMS-ESI: calcd for  $\text{C}_{13}\text{H}_{24}\text{NO}^+$  ( $[\text{M} + \text{H}^+]$ )  $m/z$  210.1852, found 210.1851.

### 7-methyl-1-phenyloct-6-en-3-one oxime

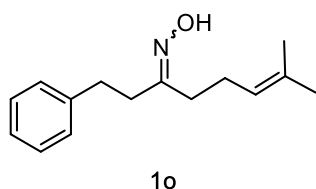

Synthesized according to **GP1** and **GP6**. Colorless oil, *E:Z* = 50:50.  $^1\text{H}$  NMR (400 MHz,  $\text{CDCl}_3$ )  $\delta$  9.10 (br, 1H), 7.33 – 7.08 (m, 5H), 5.20 – 5.00 (m, 1H), 2.95 – 2.78 (m, 2H), 2.70 – 2.58 (m, 1H), 2.55 – 2.45 (m, 1H), 2.43 – 2.33 (m, 1H), 2.28 – 2.07 (m, 3H), 1.69 (s, 1.5H), 1.68 (s, 1.5H), 1.62 (s, 1.5H), 1.59 (s, 1.5H).  $^{13}\text{C}$  NMR (100 MHz,  $\text{CDCl}_3$ )  $\delta$  160.9, 160.8, 141.5, 141.4, 132.8, 132.6, 128.5, 128.5, 128.4, 128.4, 126.1, 126.1, 123.3, 123.1, 36.4, 34.7, 32.6, 31.6, 30.1, 28.2, 25.7, 25.7, 24.8, 24.2, 17.8, 17.7. HRMS-ESI: calcd for  $\text{C}_{15}\text{H}_{22}\text{NO}^+$  ( $[\text{M} + \text{H}^+]$ )  $m/z$  232.1696, found 232.1697.

### 8-methyl-1-phenylnon-7-en-4-one oxime

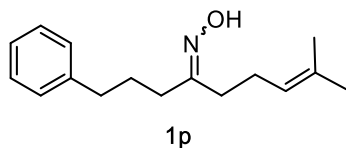

Synthesized according to **GP1** and **GP6**. Colorless oil, *E:Z* = 50:50.  $^1\text{H}$  NMR (400 MHz,  $\text{CDCl}_3$ )  $\delta$  9.20 – 8.10 (m, 1H), 7.35 – 7.25 (m, 2H), 7.22 – 7.08 (m, 3H), 5.18 – 5.00 (m, 1H), 2.78 – 2.57 (m, 2H), 2.46 – 2.29 (m, 2H), 2.28 – 2.10 (m, 4H), 1.92 – 1.78 (m, 2H), 1.68 (s, 3H), 1.62 – 1.55 (m, 3H).  $^{13}\text{C}$  NMR (100 MHz,  $\text{CDCl}_3$ )  $\delta$  161.3, 141.9, 141.9, 132.7, 132.6, 128.5, 128.4, 128.4, 125.9, 125.9, 123.4, 123.1, 36.1, 35.4, 34.2, 33.9, 27.9, 27.8, 27.4, 27.3, 25.7, 25.7, 24.9, 24.2, 17.7, 17.7. HRMS-ESI: calcd for  $\text{C}_{16}\text{H}_{24}\text{NO}^+$  ( $[\text{M} + \text{H}^+]$ )  $m/z$  246.1852, found 246.1848.

### (4E)-1,5-diphenylhex-4-en-1-one oxime

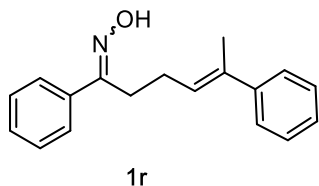

Synthesized according to **GP1**. White solid, m.p. = 74.3 – 74.9 °C, *E:Z* = 82:18. <sup>1</sup>H NMR (400 MHz, CDCl<sub>3</sub>) δ 10.05 (s, 1H), 7.75 – 7.55 (m, 1.64H), 7.50 – 7.42 (m, 0.36H), 7.41 – 7.08 (m, 8H), 5.79 (t, *J* = 7.2 Hz, 0.82H), 5.52 (t, *J* = 7.2 Hz, 0.18H), 2.97 (t, *J* = 8.0 Hz, 1.64H), 2.82 (t, *J* = 8.0 Hz, 0.36H), 2.49 (dd, *J* = 15.6, 7.6 Hz, 1.64H), 2.26 (dd, *J* = 15.6, 7.6 Hz, 0.36H), 1.99 (s, 0.54H), 1.95 (s, 2.46H). <sup>13</sup>C NMR (100 MHz, CDCl<sub>3</sub>) δ 159.4, 159.2, 143.9, 141.9, 137.8, 136.0, 135.9, 135.7, 129.4, 129.3, 128.8, 128.7, 128.3, 128.2, 128.0, 127.0, 126.8, 126.7, 126.6, 126.4, 126.2, 125.8, 26.9, 26.5, 26.0, 25.7, 16.0. HRMS-ESI: calcd for C<sub>18</sub>H<sub>20</sub>NO<sup>+</sup> ([M + H<sup>+</sup>]) *m/z* 266.1539, found 266.1531.

### (E)-2-(3-methylbut-2-en-1-yl)-3,4-dihydronaphthalen-1(2H)-one oxime

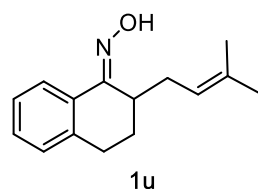

Synthesized according to **GP1**. White solid, m.p. = 134.5 – 136.0 °C. <sup>1</sup>H NMR (400 MHz, CDCl<sub>3</sub>) δ 8.66 (br, 1H), 7.89 (d, *J* = 7.6 Hz, 1H), 7.27 (t, *J* = 7.2 Hz, 1H), 7.19 (t, *J* = 7.2 Hz, 1H), 7.15 (d, *J* = 7.6 Hz, 1H), 5.22 (t, *J* = 7.2 Hz, 1H), 3.57 (td, *J* = 8.8, 4.4 Hz, 1H), 2.92 (ddd, *J* = 16.8, 12.0, 5.2 Hz, 1H), 2.67 (dt, *J* = 16.8, 4.4 Hz, 1H), 2.45 – 2.30 (m, 1H), 2.16 (dt, *J* = 14.4, 9.2 Hz, 1H), 1.98 – 1.80 (m, 2H), 1.72 (s, 3H), 1.62 (s, 3H). <sup>13</sup>C NMR (100 MHz, CDCl<sub>3</sub>) δ 158.5, 138.9, 133.4, 130.1, 129.1, 128.9, 126.3, 124.5, 122.0, 32.2, 27.2, 25.9, 25.1, 24.4, 17.9. HRMS-ESI: calcd for C<sub>15</sub>H<sub>20</sub>NO<sup>+</sup> ([M + H<sup>+</sup>]) *m/z* 230.1539, found 230.1533.

### 7-methyloct-6-en-3-one oxime

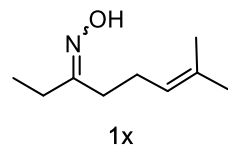

Synthesized according to **GP1** and **GP6**. Colorless oil, *E:Z* = 50:50. <sup>1</sup>H NMR (400 MHz, CDCl<sub>3</sub>) δ 9.77 (br, 1H), 5.25 – 5.00 (m, 1H), 2.55 – 2.32 (m, 2H), 2.28 – 2.15 (m, 4H), 1.69 (s, 3H), 1.63 (s, 1.5H), 1.62 (s, 1.5H), 1.10 (t, *J* = 7.6 Hz, 3H). <sup>13</sup>C NMR (100 MHz, CDCl<sub>3</sub>) δ 162.3, 162.2, 132.5, 132.5, 123.5, 123.2, 33.8, 27.9, 27.7, 25.6, 25.0, 24.2, 21.0, 17.7, 17.6, 10.7, 10.0. HRMS-ESI: calcd for C<sub>10</sub>H<sub>20</sub>NO<sup>+</sup> ([M + H<sup>+</sup>]) *m/z* 170.1539, found 170.1536.

### 2,7-dimethyloct-6-en-3-one oxime

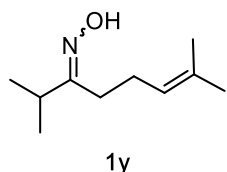

Synthesized according to **GP1** and **GP6**. Colorless oil, *E:Z* = 84:16.  $^1\text{H}$  NMR (400 MHz,  $\text{CDCl}_3$ )  $\delta$  9.75 (br, 1H), 5.40 – 5.00 (m, 1H), 3.44 (dt,  $J$  = 14.0, 6.8 Hz, 0.16H), 2.50 (dt,  $J$  = 14.0, 6.8 Hz, 0.84H), 2.37 – 2.14 (m, 4H), 1.69 (s, 3H), 1.63 (s, 2.52H), 1.61 (s, 0.48H), 1.11 (d,  $J$  = 6.8 Hz, 5.04H), 1.08 (d,  $J$  = 6.8 Hz, 0.96H).  $^{13}\text{C}$  NMR (100 MHz,  $\text{CDCl}_3$ )  $\delta$  165.0, 164.6, 132.3, 123.7, 123.6, 33.8, 30.1, 27.1, 26.3, 25.6, 24.9, 24.5, 19.9, 18.9, 17.6, 17.6. HRMS-ESI: calcd for  $\text{C}_9\text{H}_{18}\text{NO}_3^+$  ( $[\text{M} + \text{H}^+]$ )  $m/z$  186.1125, found 186.1122.

### methyl 2-(hydroxyimino)-6-methylhept-5-enoate

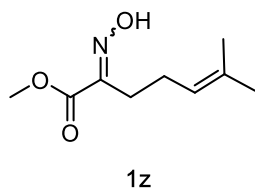

Synthesized according to **GP1** and **GP5**. Colorless oil.  $^1\text{H}$  NMR (400 MHz,  $\text{CDCl}_3$ )  $\delta$  10.35 (br, 1H), 5.15 (t,  $J$  = 6.8 Hz, 1H), 3.85 (s, 3H), 2.65 (t,  $J$  = 8.0 Hz, 2H), 2.23 (dd,  $J$  = 15.6, 7.6 Hz, 2H), 1.68 (s, 3H), 1.61 (s, 3H).  $^{13}\text{C}$  NMR (100 MHz,  $\text{CDCl}_3$ )  $\delta$  164.0, 152.5, 133.1, 122.7, 52.6, 25.6, 24.9, 24.3, 17.5. HRMS-ESI: calcd for  $\text{C}_9\text{H}_{16}\text{NO}_3^+$  ( $[\text{M} + \text{H}^+]$ )  $m/z$  186.1125, found 186.1122.

## 3. Deoxygenation of oximes for the synthesis of pyrrolines

### 3.1 Reaction setup

We use RLH-18 8-position Photo Reaction System, which is manufactured by Beijing Rogertech Co. (**Figure S1**). The photo reactor was equipped with 8 blue light LED (10 W) and a cooling fan was used to keep reactions around room temperature. All the reactions were performed in borosilicate glassware while irradiating with a 455 nm 10 W blue light LED (**Figure S2**), at a distance of 2 cm, without the use of any filter.

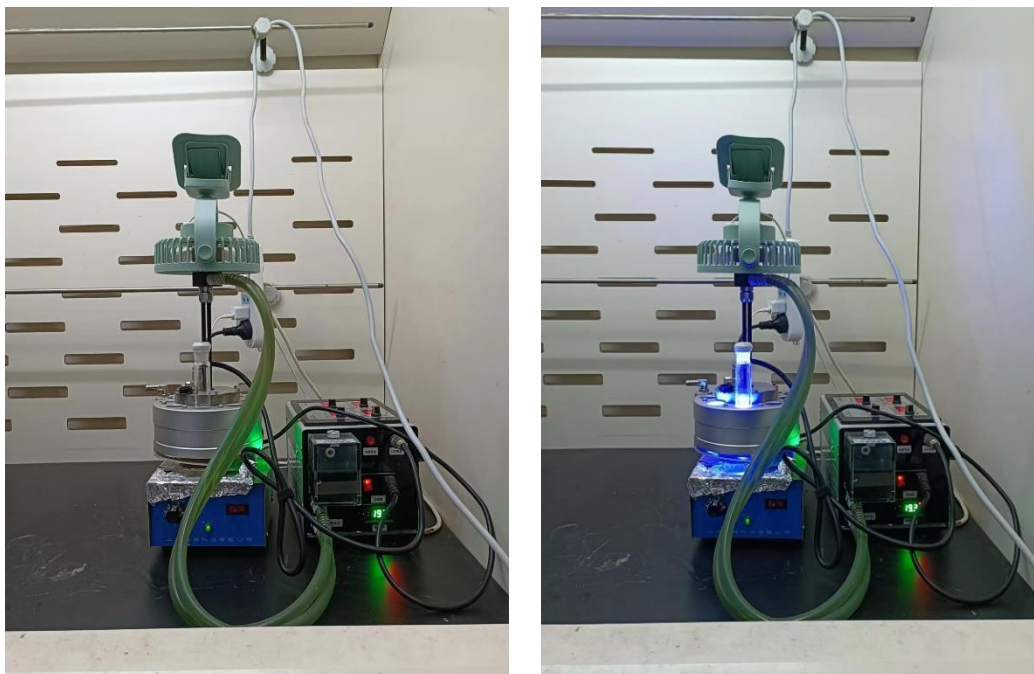

**Figure S1.** Integrated photoreactor and associated equipment.



## RLH-18 10WLED Test report

### Product Mark

Model: 1-455nm(456.7)@10W  
 Temperature: 20°C  
 Tester: Wu

Manufacture: Beijing Rogertech Ltd  
 Humidity: 65%  
 Test Date: 2022-06-21,15:34:31

### Parameter

| Name                      | Value         | Name                    | Value         | Name              | Value       | Name | Value |
|---------------------------|---------------|-------------------------|---------------|-------------------|-------------|------|-------|
| ESuv(mW/cm <sup>2</sup> ) | 0.0000        | CIE u,v                 | 0.1839,0.0693 | CIE1931 Y         | 130873.648  |      |       |
| Euvv(mW/cm <sup>2</sup> ) | 0.0000        | CIE u',v'               | 0.1839,0.1039 | CIE1931 Z         | 2949318.500 |      |       |
| Euvb(mW/cm <sup>2</sup> ) | 0.0000        | SDCM                    | 100.00        | TLCI-2012         | 1           |      |       |
| Euva(mW/cm <sup>2</sup> ) | 0.0000        | Ra                      | -63.7         | Integral Time(ms) | 0.1         |      |       |
| Euv(mW/cm <sup>2</sup> )  | 0.00          | Ee(mW/cm <sup>2</sup> ) | 194.23262     | Peak Signal       | 53258       |      |       |
| Eb(mW/cm <sup>2</sup> )   | 190.91        | S/P                     | 20.108        | Dark Signal       | 2045        |      |       |
| Eg(mW/cm <sup>2</sup> )   | 1.67          | Dominant(nm)            | 461.30        | Compensate level  | 2878        |      |       |
| Er(mW/cm <sup>2</sup> )   | 0.00          | Purity(%)               | 98.5          |                   |             |      |       |
| Eir(mW/cm <sup>2</sup> )  | 0.00          | HalfWidth(nm)           | 25.2          |                   |             |      |       |
| E(lx)                     | 89386.70      | Peak(nm)                | 456.7         |                   |             |      |       |
| Candle E(fc)              | 8304.23       | Center(nm)              | 457.4         |                   |             |      |       |
| CCT(K)                    | 100000        | Centroid(nm)            | 458.5         |                   |             |      |       |
| Duv                       | -0.05186      | Color Ratio(RGB)        | 0.0,12.1,87.9 |                   |             |      |       |
| CIE x,y                   | 0.1446,0.0363 | CIE1931 X               | 520893.188    |                   |             |      |       |

### Spectrogram

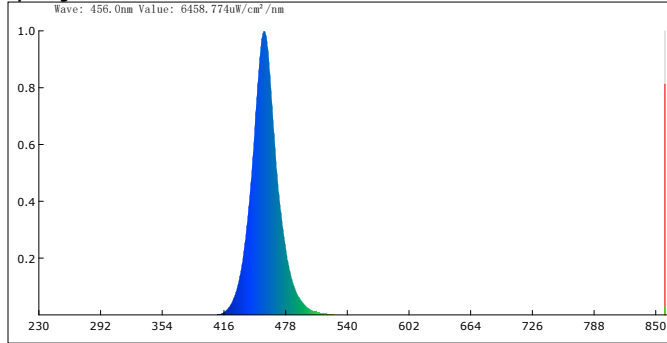

### CIE1931

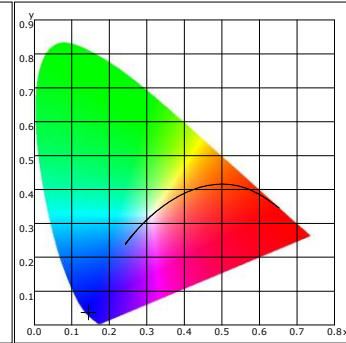

### CRI

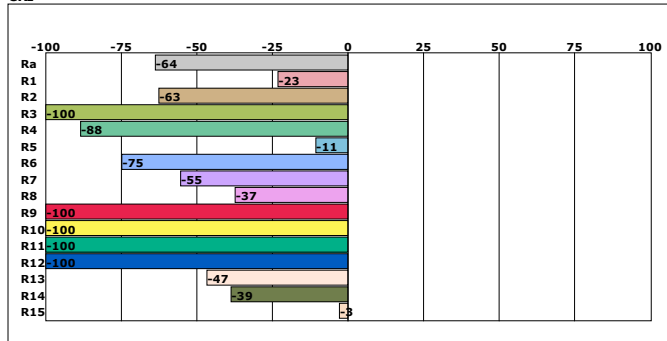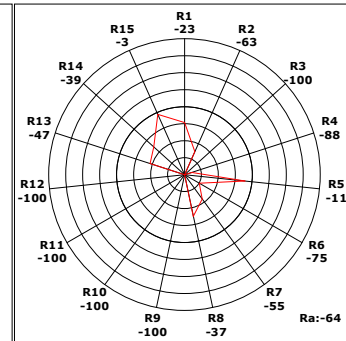

### Instrument Status

Type: OHSP-350UV  
 Integral Time: 0.077ms

SN: 0  
 VPeak: 53258

Scan Range: 230-850nm  
 VDark: 2045

Remark:

- 1 -

Figure S2. Spectrophotometer analysis report.

### 3.2 General procedure

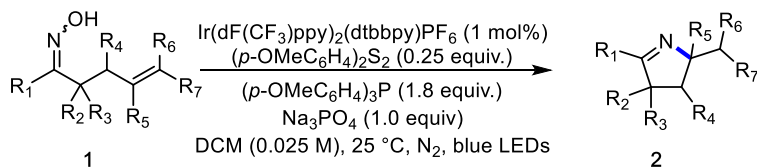

To an oven-dried reaction tube equipped with a stir bar was added oximes (0.1 mmol, 1.0 equiv.), (p-OMeC<sub>6</sub>H<sub>4</sub>)<sub>2</sub>S<sub>2</sub> (0.025 mmol, 0.25 equiv.), (p-OMeC<sub>6</sub>H<sub>4</sub>)<sub>3</sub>P (0.18 mmol, 1.8 equiv.), Na<sub>3</sub>PO<sub>4</sub> (1.0 equiv.) and Ir(dF(CF<sub>3</sub>)ppy)<sub>2</sub>(dtbbpy)PF<sub>6</sub> (1 mol%). The tube was sealed and placed under nitrogen before DCM (4 mL) was added. The reaction mixture was irradiated by a 10 W blue LED at 25 °C for 12 hours. Then the reaction mixture was concentrated and purified through column chromatography to afford the desired product.

### 3.3 Optimization details

**Table S1.** Screening of the H-donor.

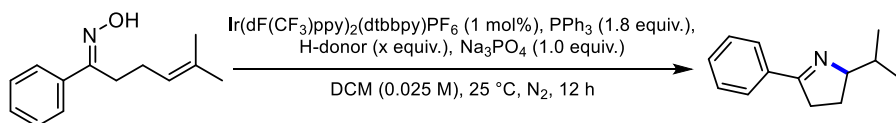

| entry | H-donor (x equiv.)                                                              | yield (%) <sup>a</sup> |
|-------|---------------------------------------------------------------------------------|------------------------|
| 1     | (p-OMeC <sub>6</sub> H <sub>4</sub> ) <sub>2</sub> S <sub>2</sub> (0.25 equiv.) | 82                     |
| 2     | Ph <sub>2</sub> S <sub>2</sub> (0.25 equiv.)                                    | 68                     |
| 3     | TRIP-SH (0.5 equiv.)                                                            | 68                     |
| 4     | (p-OMeC <sub>6</sub> H <sub>4</sub> ) <sub>2</sub> S <sub>2</sub> (0.05 equiv.) | 36                     |
| 5     | (p-OMeC <sub>6</sub> H <sub>4</sub> ) <sub>2</sub> S <sub>2</sub> (0.15 equiv.) | 72                     |
| 6     | (p-OMeC <sub>6</sub> H <sub>4</sub> ) <sub>2</sub> S <sub>2</sub> (0.35 equiv.) | 78                     |

<sup>a</sup>Yields were calculated by <sup>1</sup>H NMR using 1,3,5-trimethoxybenzene as internal standards.

**Table S2.** Screening of the base.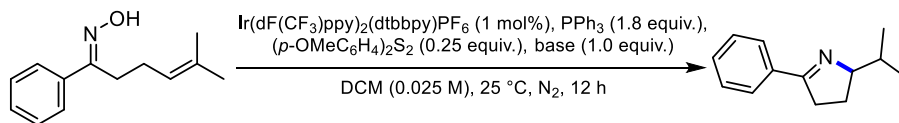

| entry | Base                             | yield (%) <sup>a</sup> |
|-------|----------------------------------|------------------------|
| 1     | Na <sub>3</sub> PO <sub>4</sub>  | 82                     |
| 2     | no base                          | 58                     |
| 3     | Na <sub>2</sub> CO <sub>3</sub>  | 77                     |
| 4     | NaOAc                            | 50                     |
| 5     | NaHCO <sub>3</sub>               | 77                     |
| 6     | Na <sub>2</sub> HPO <sub>4</sub> | 69                     |
| 7     | NaH <sub>2</sub> PO <sub>4</sub> | 68                     |
| 8     | K <sub>3</sub> PO <sub>4</sub>   | 79                     |
| 9     | K <sub>2</sub> HPO <sub>4</sub>  | 77                     |
| 10    | KH <sub>2</sub> PO <sub>4</sub>  | 66                     |
| 11    | 2,6-lutidine                     | 47                     |
| 12    | 2,4,6-collidine                  | 41                     |

<sup>a</sup>Yields were calculated by <sup>1</sup>H NMR using 1,3,5-trimethoxybenzene as internal standards.

**Table S3.** Screening of the photocatalysts.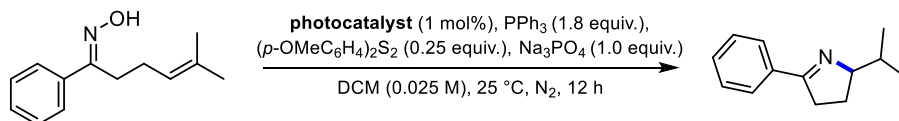

| entry | photocatalyst                                                    | yield (%) <sup>a</sup> |
|-------|------------------------------------------------------------------|------------------------|
| 1     | Ir(dF(CF <sub>3</sub> )ppy) <sub>2</sub> (dtbbpy)PF <sub>6</sub> | 82                     |
| 2     | Ir(dF(CF <sub>3</sub> )ppy) <sub>2</sub> (phen)PF <sub>6</sub>   | 65                     |
| 3     | [Ir(ppy) <sub>2</sub> (dtbbpy)]PF <sub>6</sub>                   | 2                      |
| 4     | [Ru(bpz) <sub>3</sub> ](PF <sub>6</sub> ) <sub>2</sub>           | trace                  |
| 5     | Ir(ppy) <sub>3</sub>                                             | 6                      |
| 6     | 4-CzIPN (5 mol%)                                                 | 10                     |

<sup>a</sup>Yields were calculated by <sup>1</sup>H NMR using 1,3,5-trimethoxybenzene as internal standards.

**Table S4.** Screening of the solvent.

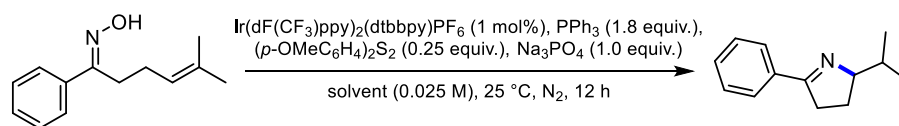

| entry | solvent | yield (%) <sup>a</sup> |
|-------|---------|------------------------|
| 1     | DCM     | 82                     |
| 2     | THF     | 0                      |
| 3     | MeCN    | 4                      |
| 4     | PhMe    | 6                      |
| 5     | DMF     | 0                      |
| 6     | DMSO    | 0                      |

<sup>a</sup>Yields were calculated by <sup>1</sup>H NMR using 1,3,5-trimethoxybenzene as internal standards.

**Table S5.** Screening of the concentration.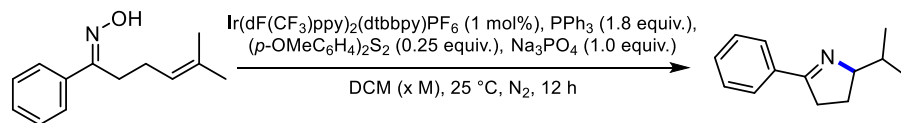

| entry | concentration | yield (%) <sup>a</sup> |
|-------|---------------|------------------------|
| 1     | DCM (0.1 M)   | 60                     |
| 2     | DCM (0.05 M)  | 71                     |
| 3     | DCM (0.025 M) | 82                     |
| 4     | DCM (0.013 M) | 69                     |

<sup>a</sup>Yields were calculated by <sup>1</sup>H NMR using 1,3,5-trimethoxybenzene as internal standards.

**Table S6.** Screening of the phosphine.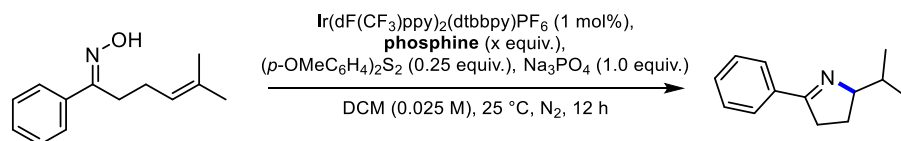

| entry | phosphine (x equiv.)                                                      | yield (%) <sup>a</sup> |
|-------|---------------------------------------------------------------------------|------------------------|
| 1     | PPh <sub>3</sub> (1.2 equiv.)                                             | 74                     |
| 2     | PPh <sub>3</sub> (1.4 equiv.)                                             | 78                     |
| 3     | PPh <sub>3</sub> (1.6 equiv.)                                             | 78                     |
| 4     | PPh <sub>3</sub> (1.8 equiv.)                                             | 82                     |
| 5     | PPh <sub>3</sub> (2.0 equiv.)                                             | 81                     |
| 6     | ( <i>p</i> -MeC <sub>6</sub> H <sub>4</sub> ) <sub>3</sub> P (1.8 equiv.) | 88                     |

|   |                                                                            |    |
|---|----------------------------------------------------------------------------|----|
| 7 | ( <i>p</i> -FC <sub>6</sub> H <sub>4</sub> ) <sub>3</sub> P (1.8 equiv.)   | 55 |
| 8 | ( <i>p</i> -OMeC <sub>6</sub> H <sub>4</sub> ) <sub>3</sub> P (1.8 equiv.) | 94 |
| 9 | Ph <sub>2</sub> POEt (1.8 equiv.)                                          | 52 |

<sup>a</sup>Yields were calculated by <sup>1</sup>H NMR using 1,3,5-trimethoxybenzene as internal standards.

### 3.4 Control experiments

**Table S7.** Control experiments for the synthesis of pyrrolines.

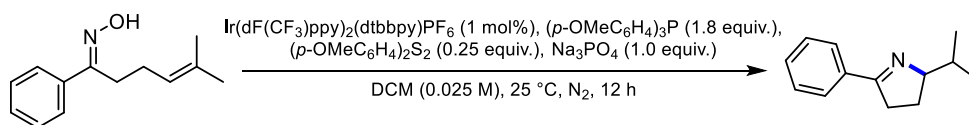

| entry | deviation from standard conditions                                            | yield (%) <sup>a</sup> |
|-------|-------------------------------------------------------------------------------|------------------------|
| 1     | none                                                                          | 94                     |
| 2     | no ( <i>p</i> -OMeC <sub>6</sub> H <sub>4</sub> ) <sub>3</sub> P              | 0                      |
| 3     | no photocatalyst                                                              | 0                      |
| 4     | no light                                                                      | 0                      |
| 5     | no ( <i>p</i> -OMeC <sub>6</sub> H <sub>4</sub> ) <sub>2</sub> S <sub>2</sub> | 47                     |

<sup>a</sup>Yields were calculated by <sup>1</sup>H NMR using 1,3,5-trimethoxybenzene as internal standards.

### 3.5 Gram-scale reaction

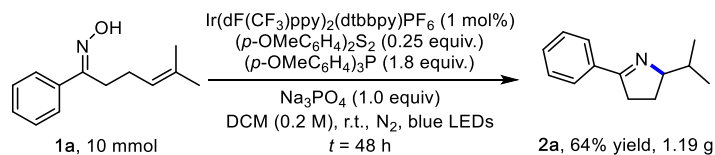

To a 250 mL round-bottomed flask equipped with a stir bar was added **1a** (10.0 mmol, 2.033 g, 1.0 equiv.), (*p*-OMeC<sub>6</sub>H<sub>4</sub>)<sub>2</sub>S<sub>2</sub> (2.5 mmol, 696 mg, 0.25 equiv.), (*p*-OMeC<sub>6</sub>H<sub>4</sub>)<sub>3</sub>P (18.0 mmol, 6.34 g, 1.8 equiv.), Na<sub>3</sub>PO<sub>4</sub> (10.0 mmol, 1.64 g, 1.0 equiv.) and Ir(dF(CF<sub>3</sub>)ppy)<sub>2</sub>(dtbbpy)PF<sub>6</sub> (116.6 mg, 1 mol%). The flask was sealed and placed under nitrogen before DCM (50 mL) was added. The reaction mixture was irradiated by a 50 W blue LED at room temperature for 48 hours. Then the reaction mixture was concentrated and purified through column chromatography to afford **2a** (1.19 g, 64% yield).

### 3.6 Gram-scale synthesis in continuous-flow

#### Flow reactor setup

The outline diagram of the assembled flow photoreactor was shown in **Figure S3**. The flow photoreactor was mainly consisted of a syringe pump (TYB01-01), an RLH-18 octet photocatalytic parallel reaction system with eight 10W blue LEDs, and a cylindrical coil continuous-flow reaction system (RLR-18CF, **Figure S4**), which were purchased from Beijing Roger tech Ltd. FEP tubing (1 mm inner diameter) was selected, and the calculated residence volume of the tubing was about 12 mL. The reaction temperature was controlled by an aluminum cooling block, which was connected to a chiller (2 °C).

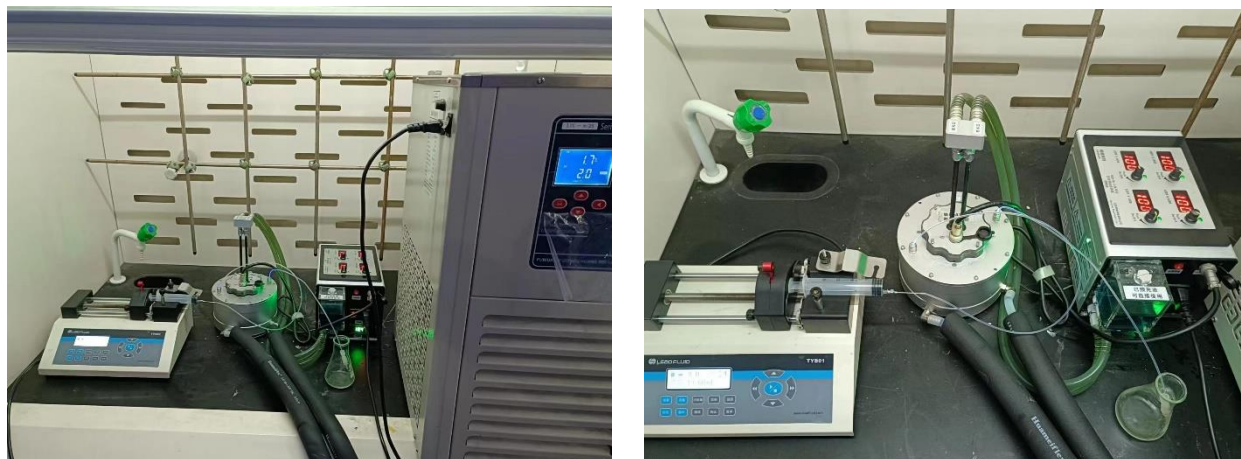

**Figure S3.** Picture of the Flow Photoreactor

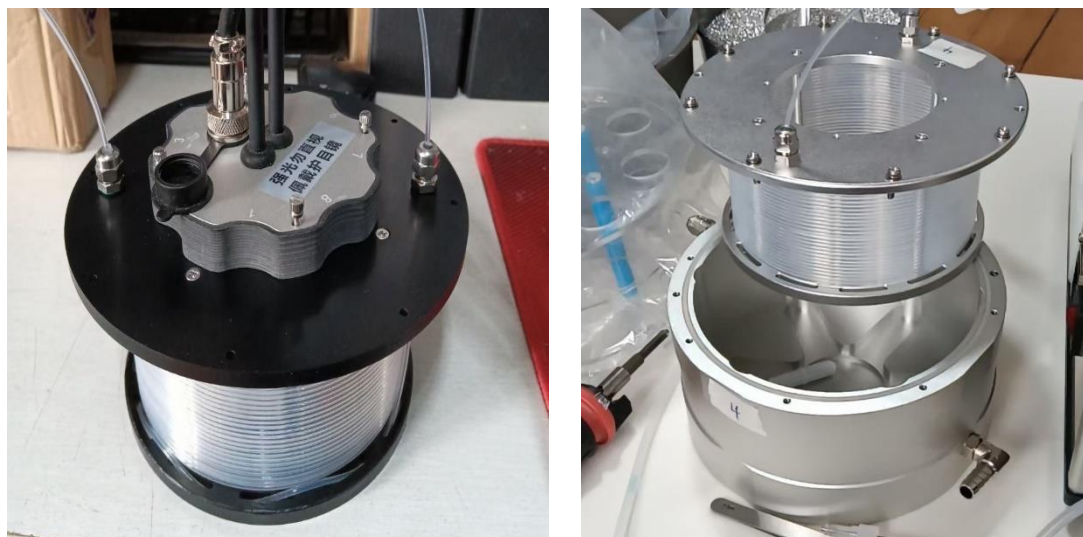

**Figure S4.** Pictures of the cylindrical coil

### General procedure

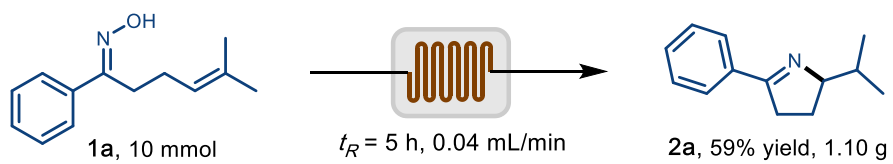

To a 250 mL round-bottomed flask was added **1a** (10.0 mmol, 2.033 g, 1.0 equiv.), (*p*-



OMeC<sub>6</sub>H<sub>4</sub>)<sub>2</sub>S<sub>2</sub> (2.5 mmol, 696 mg, 0.25 equiv.), (*p*-OMeC<sub>6</sub>H<sub>4</sub>)<sub>3</sub>P (18.0 mmol, 6.34 g, 1.8 equiv.) and Ir(dF(CF<sub>3</sub>)ppy)<sub>2</sub>(dtbbpy)PF<sub>6</sub> (116.6 mg, 1 mol%). The flask was sealed and placed under nitrogen before DCM (50 mL) was added. The mixture solution was transferred to syringe and pumped via a syringe pump to pass through the flow photoredox system with a flow rate of 0.04 mL/min. The outlet solution was collected, concentrated, and purified through column chromatography to afford **2a** (1.10 g, 59% yield).

### 3.7 Characterization data for all the products

#### 2-isopropyl-5-phenyl-3,4-dihydro-2H-pyrrole

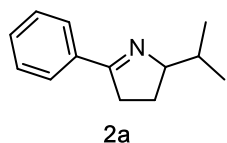

Purified by column chromatography (PE/EA = 20:1), colorless oil (16.1 mg, 86% yield). <sup>1</sup>H NMR (400 MHz, CDCl<sub>3</sub>) δ 7.90 – 7.65 (m, 2H), 7.50 – 7.23 (m, 3H), 3.95 (dd, *J* = 14.4, 6.8 Hz, 1H), 3.01 – 2.71 (m, 2H), 2.10 – 1.94 (m, 1H), 1.94 – 1.80 (m, 1H), 1.68 – 1.50 (m, 1H), 1.01 (d, *J* = 6.8 Hz, 3H), 0.84 (d, *J* = 6.4 Hz, 3H). <sup>13</sup>C NMR (100 MHz, CDCl<sub>3</sub>) δ 171.8, 134.9, 130.1, 128.3, 127.6, 79.2, 35.3, 33.5, 25.2, 20.0, 18.4. HRMS-ESI: calcd for C<sub>13</sub>H<sub>18</sub>N<sup>+</sup> ([M + H<sup>+</sup>]) *m/z* 188.1434, found 188.1438.

#### 2-isopropyl-5-(2-methoxyphenyl)-3,4-dihydro-2H-pyrrole

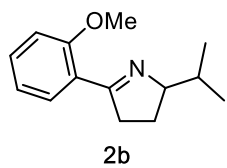

Purified by column chromatography (PE/EA = 20:1), colorless oil (10.9 mg, 50% yield). <sup>1</sup>H NMR (400 MHz, CDCl<sub>3</sub>) δ 7.67 (d, *J* = 7.2 Hz, 1H), 7.27 (t, *J* = 8.0 Hz, 1H), 6.89 (t, *J* = 7.6 Hz, 1H), 6.83 (d, *J* = 8.4 Hz, 1H), 3.85 (dd, *J* = 13.6, 6.8 Hz, 1H), 3.76 (s, 3H), 2.90 (t, *J* = 7.6 Hz, 2H), 2.00 – 1.84 (m, 2H), 1.64 – 1.45 (m, 1H), 1.00 (d, *J* = 6.8 Hz, 3H), 0.84 (d, *J* = 6.8 Hz, 3H). <sup>13</sup>C NMR (100 MHz, CDCl<sub>3</sub>) δ 173.0, 158.1, 130.9, 130.1, 125.2, 120.6, 111.2, 77.8, 55.4, 38.8, 33.3, 25.5, 20.1, 18.3. HRMS-ESI: calcd for C<sub>14</sub>H<sub>20</sub>NO<sup>+</sup> ([M + H<sup>+</sup>]) *m/z* 218.1539, found 218.1532.

### 2-isopropyl-5-(3-methoxyphenyl)-3,4-dihydro-2H-pyrrole

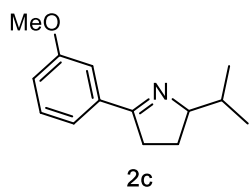

Purified by column chromatography (PE/EA = 20:1), colorless oil (17.5 mg, 81% yield).  $^1\text{H}$  NMR (400 MHz,  $\text{CDCl}_3$ )  $\delta$  7.37 (s, 1H), 7.29 (d,  $J = 7.6$  Hz, 1H), 7.26 – 7.16 (m, 1H), 6.88 (dd,  $J = 8.0, 2.4$  Hz, 1H), 3.93 (dd,  $J = 14.4, 6.8$  Hz, 1H), 3.77 (s, 3H), 3.01 – 2.68 (m, 2H), 2.10 – 1.93 (m, 1H), 1.93 – 1.80 (m, 1H), 1.68 – 1.50 (m, 1H), 1.00 (d,  $J = 6.8$  Hz, 3H), 0.83 (d,  $J = 6.8$  Hz, 3H).  $^{13}\text{C}$  NMR (100 MHz,  $\text{CDCl}_3$ )  $\delta$  171.8, 159.6, 136.3, 129.3, 120.4, 116.5, 112.1, 79.1, 55.4, 35.4, 33.5, 25.1, 20.1, 18.3.  $\text{C}_{14}\text{H}_{20}\text{NO}^+$  ( $[\text{M} + \text{H}^+]$ )  $m/z$  218.1539, found 218.1531.

### 2-isopropyl-5-(4-methoxyphenyl)-3,4-dihydro-2H-pyrrole

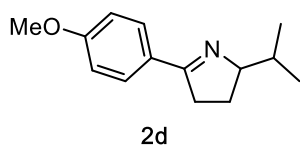

Purified by column chromatography (PE/EA = 20:1), light yellow solid (21.1 mg, 97% yield), m.p. = 45.6 – 46.6 °C.  $^1\text{H}$  NMR (400 MHz,  $\text{CDCl}_3$ )  $\delta$  7.79 (d,  $J = 8.0$  Hz, 2 H), 6.90 (d,  $J = 8.0$  Hz, 2 H), 3.98 (dd,  $J = 14.4, 6.8$  Hz, 1H), 3.83 (s, 3H), 3.05 – 2.70 (m, 2H), 2.12 – 1.97 (m, 1H), 1.97 – 1.85 (m, 1H), 1.75 – 1.55 (m, 1H), 1.07 (d,  $J = 6.4$  Hz, 3H), 0.90 (d,  $J = 6.4$  Hz, 3H).  $^{13}\text{C}$  NMR (100 MHz,  $\text{CDCl}_3$ )  $\delta$  171.1, 161.2, 129.2, 127.8, 113.6, 78.9, 55.3, 35.2, 33.5, 25.2, 20.1, 18.3.  $\text{C}_{14}\text{H}_{20}\text{NO}^+$  ( $[\text{M} + \text{H}^+]$ )  $m/z$  218.1539, found 218.1531.

### 2-isopropyl-5-(*p*-tolyl)-3,4-dihydro-2H-pyrrole

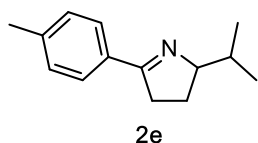

Purified by column chromatography (PE/EA = 20:1), colorless oil (19.1 mg, 95% yield).  $^1\text{H}$  NMR (400 MHz,  $\text{CDCl}_3$ )  $\delta$  7.73 (d,  $J = 8.0$  Hz, 2H), 7.19 (d,  $J = 8.0$  Hz, 2H), 4.00 (dd,  $J = 14.4, 6.8$  Hz, 1H), 3.01 – 2.75 (m, 2H), 2.37 (s, 3H), 2.12 – 2.00 (m, 1H), 2.00 – 1.86 (m, 1H), 1.74 – 1.56 (m, 1H), 1.07 (d,  $J = 6.8$  Hz, 3H), 0.90 (d,  $J = 6.8$  Hz, 3H).  $^{13}\text{C}$  NMR (100 MHz,  $\text{CDCl}_3$ )  $\delta$  171.7, 140.3, 132.2, 129.0, 127.6, 79.0, 35.3, 33.5, 25.1, 21.4, 20.0, 18.3. HRMS-ESI: calcd for  $\text{C}_{14}\text{H}_{20}\text{N}^+$  ( $[\text{M} + \text{H}^+]$ )  $m/z$  202.1590, found 202.1617.

### 5-(4-chlorophenyl)-2-isopropyl-3,4-dihydro-2H-pyrrole

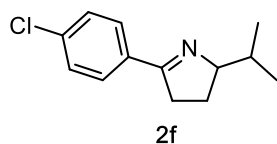

Purified by column chromatography (PE/EA = 20:1), white solid (18.9 mg, 85% yield), m.p. = 49.1 – 50.0 °C.  $^1\text{H}$  NMR (400 MHz,  $\text{CDCl}_3$ )  $\delta$  7.68 (d,  $J = 8.4$  Hz, 2H), 7.27 (d,  $J = 8.4$  Hz, 2H), 3.90 (dd,  $J = 14.4, 7.2$  Hz, 1H), 2.95 – 2.62 (m, 2H), 2.10 – 1.92 (m, 1H), 1.92 – 1.74 (m, 1H), 1.66 – 1.43

(m, 1H), 0.99 (d,  $J = 6.8$  Hz, 3H), 0.82 (d,  $J = 6.8$  Hz, 3H).  $^{13}\text{C}$  NMR (100 MHz,  $\text{CDCl}_3$ )  $\delta$  170.7, 136.2, 133.3, 129.0, 128.6, 79.3, 35.2, 33.6, 25.3, 20.0, 18.4. HRMS-ESI: calcd for  $\text{C}_{13}\text{H}_{17}\text{ClN}^+$  ( $[\text{M} + \text{H}^+]$ )  $m/z$  222.1044, found 222.1036.

#### 5-(4-bromophenyl)-2-isopropyl-3,4-dihydro-2H-pyrrole

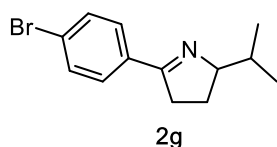

Purified by column chromatography (PE/EA = 20:1), light yellow solid (22.2 mg, 83% yield), m.p. = 60.2 – 61.7 °C.  $^1\text{H}$  NMR (400 MHz,  $\text{CDCl}_3$ )  $\delta$  7.63 (d,  $J = 8.4$  Hz, 2H), 7.44 (d,  $J = 8.4$  Hz, 2H), 3.92 (dd,  $J = 14.4, 6.8$  Hz, 1H), 2.97 – 2.60 (m, 2H), 2.10 – 1.92 (m, 1H), 1.91 – 1.80 (m, 1H), 1.68 – 1.45 (m, 1H), 0.99 (d,  $J = 6.8$  Hz, 3H), 0.83 (d,  $J = 6.8$  Hz, 3H).  $^{13}\text{C}$  NMR (100 MHz,  $\text{CDCl}_3$ )  $\delta$  170.8, 133.8, 131.5, 129.2, 124.6, 79.3, 35.2, 33.5, 25.3, 20.0, 18.4. HRMS-ESI: calcd for  $\text{C}_{13}\text{H}_{17}\text{BrN}^+$  ( $[\text{M} + \text{H}^+]$ )  $m/z$  266.0539, found 266.0531.

#### 2-isopropyl-5-(4-(trifluoromethyl)phenyl)-3,4-dihydro-2H-pyrrole

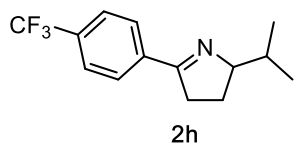

Purified by column chromatography (PE/EA = 20:1), light yellow solid (23.0 mg, 90% yield), m.p. = 51.0 – 51.6 °C.  $^1\text{H}$  NMR (400 MHz,  $\text{CDCl}_3$ )  $\delta$  7.95 (d,  $J = 7.6$  Hz, 2H), 7.65 (d,  $J = 7.6$  Hz, 2H), 4.04 (dd,  $J = 14.4, 6.8$  Hz, 1H), 3.10 – 2.65 (m, 2H), 2.18 – 2.02 (m, 1H), 2.02 – 1.89 (m, 1H), 1.78 – 1.60 (m, 1H), 1.09 (dd,  $J = 6.8, 1.6$  Hz, 3H), 0.93 (d,  $J = 6.8, 1.6$  Hz, 3H).  $^{13}\text{C}$  NMR (100 MHz,  $\text{CDCl}_3$ )  $\delta$  170.8, 138.0, 131.8 (q,  $J = 32.3$  Hz), 127.9, 125.3 (q,  $J = 3.7$  Hz), 124.0 (q,  $J = 270.6$  Hz), 79.4, 35.4, 33.5, 25.2, 20.0, 18.4.  $^{19}\text{F}$  NMR (376 MHz,  $\text{CDCl}_3$ )  $\delta$  62.74. HRMS-ESI: calcd for  $\text{C}_{14}\text{H}_{17}\text{F}_3\text{N}^+$  ( $[\text{M} + \text{H}^+]$ )  $m/z$  256.1308, found 256.1307.

#### 4-(2-isopropyl-3,4-dihydro-2H-pyrrol-5-yl)benzotrile

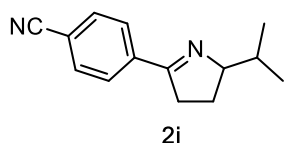

Purified by column chromatography (PE/EA = 20:1), light yellow solid (13.1 mg, 62% yield), m.p. = 75.6 – 76.6 °C.  $^1\text{H}$  NMR (400 MHz,  $\text{CDCl}_3$ )  $\delta$  7.87 (d,  $J = 8.4$  Hz, 2H), 7.62 (d,  $J = 8.4$  Hz, 2H), 3.96 (dd,  $J = 14.4, 6.8$  Hz, 1H), 3.05 – 2.65 (m, 2H), 2.15 – 2.00 (m, 1H), 1.92 – 1.79 (m, 1H), 1.68 – 1.62 (m, 1H), 1.01 (d,  $J = 6.8$  Hz, 3H), 0.86 (d,  $J = 6.8$  Hz, 3H).  $^{13}\text{C}$  NMR (100 MHz,  $\text{CDCl}_3$ )  $\delta$  170.4, 138.8, 132.2, 128.2, 118.7, 113.5, 79.6, 35.3, 33.6, 25.4, 19.9, 18.5. HRMS-ESI: calcd for  $\text{C}_{14}\text{H}_{17}\text{N}_2^+$  ( $[\text{M} + \text{H}^+]$ )  $m/z$  213.1386, found 213.1379.

### benzyl 4-(2-isopropyl-3,4-dihydro-2H-pyrrol-5-yl)benzoate

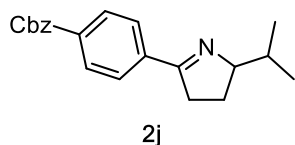

Purified by column chromatography (PE/EA = 20:1), colorless oil (24.7 mg, 77% yield).  $^1\text{H}$  NMR (400 MHz,  $\text{CDCl}_3$ )  $\delta$  7.99 (d,  $J = 8.0$  Hz, 2H), 7.78 (d,  $J = 8.0$  Hz, 2H), 7.34 (d,  $J = 8.0$  Hz, 2H), 7.32 – 7.13 (m, 3H), 5.25 (s, 2H), 3.90 (dd,  $J = 14.0, 6.8$  Hz, 1H), 3.00 – 2.65 (m, 2H), 2.05 – 1.90 (m, 1H), 1.90 – 1.73 (m, 1H), 1.65 – 1.45 (m, 1H), 0.98 (d,  $J = 6.8$  Hz, 3H), 0.81 (d,  $J = 6.8$  Hz, 3H).  $^{13}\text{C}$  NMR (100 MHz,  $\text{CDCl}_3$ )  $\delta$  171.1, 166.1, 139.0, 136.0, 131.4, 129.8, 128.7, 128.4, 128.3, 127.7, 79.5, 66.9, 35.4, 33.6, 25.3, 20.0, 18.5. HRMS-ESI: calcd for  $\text{C}_{21}\text{H}_{24}\text{NO}_2^+$  ( $[\text{M} + \text{H}^+]$ )  $m/z$  322.1802, found 322.1790.

### 2-isopropyl-5-(naphthalen-2-yl)-3,4-dihydro-2H-pyrrole

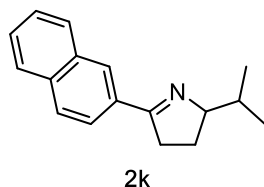

Purified by column chromatography (PE/EA = 20:1), light yellow solid (22.1 mg, 93% yield), m.p. = 70.6 – 71.2 °C.  $^1\text{H}$  NMR (400 MHz,  $\text{CDCl}_3$ )  $\delta$  8.11 – 7.95 (m, 2H), 7.90 – 7.65 (m, 3H), 7.50 – 7.25 (m, 2H), 3.99 (dd,  $J = 14.4, 6.8$  Hz, 1H), 3.10 – 2.70 (m, 2H), 2.12 – 1.95 (m, 1H), 1.95 – 1.79 (m, 1H), 1.70 – 1.50 (m, 1H), 1.03 (d,  $J = 6.4$  Hz, 3H), 0.86 (d,  $J = 6.4$  Hz, 3H).  $^{13}\text{C}$  NMR (100 MHz,  $\text{CDCl}_3$ )  $\delta$  171.9, 134.3, 133.0, 132.4, 128.7, 128.0, 128.0, 127.8, 126.9, 126.3, 124.8, 79.3, 35.3, 33.6, 25.3, 20.1, 18.4. HRMS-ESI: calcd for  $\text{C}_{17}\text{H}_{20}\text{N}^+$  ( $[\text{M} + \text{H}^+]$ )  $m/z$  238.1590, found 238.1581.

### 2-isopropyl-5-(thiophen-2-yl)-3,4-dihydro-2H-pyrrole

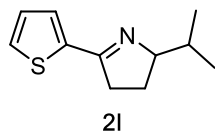

Purified by column chromatography (PE/EA = 20:1), colorless oil (14.5 mg, 75% yield).  $^1\text{H}$  NMR (400 MHz,  $\text{CDCl}_3$ )  $\delta$  7.43 – 7.35 (m, 1H), 7.31 (d,  $J = 3.6$  Hz, 1H), 7.05 (dd,  $J = 5.2, 3.6$  Hz, 1H), 4.13 – 3.85 (m, 1H), 3.10 – 2.75 (m, 2H), 2.13 – 1.99 (m, 1H), 1.99 – 1.90 (m, 1H), 1.76 – 1.62 (m, 1H), 1.05 (d,  $J = 6.4$  Hz, 3H), 0.88 (d,  $J = 6.4$  Hz, 3H).  $^{13}\text{C}$  NMR (100 MHz,  $\text{CDCl}_3$ )  $\delta$  166.4, 139.9, 128.8, 128.7, 127.4, 78.9, 36.0, 33.3, 25.2, 20.0, 18.1. HRMS-ESI: calcd for  $\text{C}_{11}\text{H}_{16}\text{NS}^+$  ( $[\text{M} + \text{H}^+]$ )  $m/z$  194.0998, found 194.0991.

### 3-(2-isopropyl-3,4-dihydro-2H-pyrrol-5-yl)pyridine

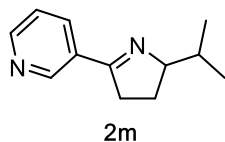

Purified by column chromatography (PE/EA = 2:1), colorless oil (13.5 mg, 72% yield). <sup>1</sup>H NMR (400 MHz, CDCl<sub>3</sub>) δ 8.99 (s, 1H), 8.65 (s, 1H), 8.21 (d, *J* = 7.6 Hz, 1H), 7.34 (dd, *J* = 8.0, 4.8 Hz, 1H), 4.02 (dd, *J* = 14.4, 6.8 Hz, 1H), 3.10 – 2.77 (m, 2H), 2.25 – 2.04 (m, 1H), 2.00 – 1.86 (m, 1H), 1.75 – 1.63 (m, 1H), 1.08 (d, *J* = 6.8 Hz, 3H), 0.92 (d, *J* = 6.4 Hz, 3H). <sup>13</sup>C NMR (100 MHz, CDCl<sub>3</sub>) δ 169.6, 151.1, 149.1, 134.8, 130.5, 123.4, 79.3, 35.2, 33.5, 25.2, 19.9, 18.5. HRMS-ESI: calcd for C<sub>12</sub>H<sub>17</sub>N<sub>2</sub><sup>+</sup> ([M + H<sup>+</sup>]) *m/z* 189.1386, found 189.1388.

### 5-cyclohexyl-2-isopropyl-3,4-dihydro-2H-pyrrole

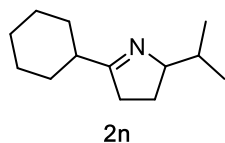

Purified by column chromatography (PE/EA = 4:1), colorless oil (7.1 mg, 37% yield). <sup>1</sup>H NMR (400 MHz, CDCl<sub>3</sub>) δ 3.79 (dd, *J* = 13.2, 6.4 Hz, 1H), 2.58 – 2.28 (m, 3H), 1.93 – 1.72 (m, 6H), 1.72 – 1.64 (m, 1H), 1.55 – 1.42 (m, 1H), 1.39 – 1.19 (m, 5H), 0.97 (d, *J* = 6.8 Hz, 3H), 0.81 (d, *J* = 6.8 Hz, 3H). <sup>13</sup>C NMR (100 MHz, CDCl<sub>3</sub>) δ 180.9, 77.9, 42.8, 34.8, 33.0, 30.7, 30.6, 26.1, 26.0, 24.4, 19.8, 17.9. HRMS-ESI: calcd for C<sub>13</sub>H<sub>24</sub>N<sup>+</sup> ([M + H<sup>+</sup>]) *m/z* 194.1903, found 194.1904.

### 2-isopropyl-5-phenethyl-3,4-dihydro-2H-pyrrole

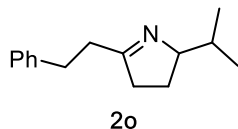

Purified by column chromatography (PE/EA = 4:1), colorless oil (11.4 mg, 53% yield). <sup>1</sup>H NMR (400 MHz, CDCl<sub>3</sub>) δ 7.34 – 7.14 (m, 5H), 3.84 – 3.72 (m, 1H), 3.00 – 2.84 (m, 2H), 2.72 – 2.56 (m, 2H), 2.46 – 2.30 (m, 2H), 1.96 – 1.75 (m, 2H), 1.55 – 1.42 (m, 1H), 0.98 (d, *J* = 6.8 Hz, 3H), 0.82 (d, *J* = 6.8 Hz, 3H). <sup>13</sup>C NMR (100 MHz, CDCl<sub>3</sub>) δ 176.3, 141.5, 128.4, 128.3, 126.0, 78.5, 37.7, 35.5, 33.1, 32.9, 25.0, 19.9, 18.2. HRMS-ESI: calcd for C<sub>15</sub>H<sub>22</sub>N<sup>+</sup> ([M + H<sup>+</sup>]) *m/z* 216.1747, found 216.1748.

### 2-isopropyl-5-(3-phenylpropyl)-3,4-dihydro-2H-pyrrole

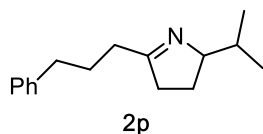

Purified by column chromatography (PE/EA = 4:1), colorless oil (9.6 mg, 42% yield).  $^1\text{H}$  NMR (400 MHz,  $\text{CDCl}_3$ )  $\delta$  7.33 – 7.23 (m, 2H), 7.22 – 7.13 (m, 3H), 3.77 (dd,  $J = 7.6, 6.4$  Hz, 1H), 2.65 (t,  $J = 7.6$  Hz, 2H), 2.50 – 2.31 (m, 4H), 1.99 – 1.77 (m, 4H), 1.55 – 1.43 (m, 1H), 0.99 (d,  $J = 6.8$  Hz, 3H), 0.85 (d,  $J = 6.8$  Hz, 3H).  $^{13}\text{C}$  NMR (100 MHz,  $\text{CDCl}_3$ )  $\delta$  176.9, 142.0, 128.5, 128.3, 125.8, 78.5, 37.3, 35.8, 33.5, 33.1, 28.6, 25.0, 19.9, 18.2. HRMS-ESI: calcd for  $\text{C}_{16}\text{H}_{24}\text{N}^+$  ( $[\text{M} + \text{H}^+]$ )  $m/z$  230.1903, found 230.1897.

### 2-benzyl-5-phenyl-3,4-dihydro-2H-pyrrole

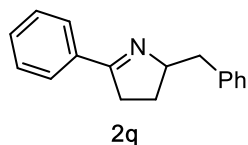

Purified by column chromatography (PE/EA = 20:1), light yellow solid (22.2 mg, 94% yield), m.p. = 77.4 – 78.6 °C.  $^1\text{H}$  NMR (400 MHz,  $\text{CDCl}_3$ )  $\delta$  8.00 – 7.78 (m, 2H), 7.45 – 7.35 (m, 3H), 7.33 – 7.23 (m, 4H), 7.23 – 7.14 (m, 1H), 4.50 (dd,  $J = 14.4, 6.8$  Hz, 1H), 3.30 (dd,  $J = 13.6, 5.2$  Hz, 1H), 2.90 – 2.75 (m, 2H), 2.72 (dd,  $J = 13.6, 8.4$  Hz, 1H), 2.10 – 1.95 (m, 1H), 1.80 – 1.65 (m, 1H).  $^{13}\text{C}$  NMR (100 MHz,  $\text{CDCl}_3$ )  $\delta$  172.6, 139.5, 134.7, 130.4, 129.5, 128.4, 128.3, 127.7, 126.1, 74.2, 42.5, 34.9, 27.9. HRMS-ESI: calcd for  $\text{C}_{17}\text{H}_{18}\text{N}^+$  ( $[\text{M} + \text{H}^+]$ )  $m/z$  236.1434, found 236.1441.

### 5-phenyl-2-(1-phenylethyl)-3,4-dihydro-2H-pyrrole

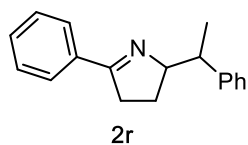

Purified by column chromatography (PE/EA = 20:1), colorless oil (16.9 mg, 68% yield), d.r. = 1.5:1.  $^1\text{H}$  NMR (400 MHz,  $\text{CDCl}_3$ )  $\delta$  7.90 – 7.74 (m, 2H), 7.45 – 7.32 (m, 3H), 7.31 – 7.23 (m, 4H), 7.22 – 7.12 (m, 1H), 4.49 (dd,  $J = 14.4, 6.8$  Hz, 0.6H), 4.36 (dd,  $J = 14.4, 6.8$  Hz, 0.4H), 3.35 – 3.20 (m, 0.6H), 2.94 – 2.56 (m, 2.4H), 2.00 – 1.84 (m, 1H), 1.77 – 1.65 (m, 0.6H), 1.60 – 1.48 (m, 1.6H), 1.34 (d,  $J = 6.8$  Hz, 1.8H).  $^{13}\text{C}$  NMR (100 MHz,  $\text{CDCl}_3$ )  $\delta$  172.8, 172.6, 144.9, 144.4, 134.9, 134.8, 130.3, 128.4, 128.3, 128.2, 128.1, 128.0, 127.7, 126.2, 126.1, 78.8, 78.5, 46.1, 44.3, 35.3, 34.9, 27.0, 25.0, 19.9, 16.4. HRMS-ESI: calcd for  $\text{C}_{18}\text{H}_{20}\text{N}^+$  ( $[\text{M} + \text{H}^+]$ )  $m/z$  250.1590, found 250.1581.

### 2-isopropyl-4,4-dimethyl-5-phenyl-3,4-dihydro-2H-pyrrole

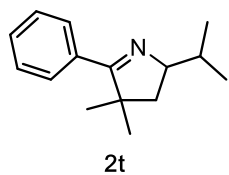

Purified by column chromatography (PE/EA = 20:1), colorless oil (10.1 mg, 47% yield).  $^1\text{H}$  NMR (400 MHz,  $\text{CDCl}_3$ )  $\delta$  7.70 – 7.55 (m, 2H), 7.35 – 7.25 (m, 3H), 3.70 (dt,  $J = 9.2, 6.8$  Hz, 1H), 1.91 – 1.77 (m, 2H), 1.51 (dd,  $J = 12.4, 9.2$  Hz, 1H), 1.28 (s, 3H), 1.23 (s, 3H), 1.04 (d,  $J = 6.8$  Hz, 3H), 0.87 (d,  $J = 6.8$  Hz, 3H).  $^{13}\text{C}$  NMR (100 MHz,  $\text{CDCl}_3$ )  $\delta$  178.1, 134.2, 128.2, 127.1, 126.9, 72.9, 49.2, 43.9, 32.3, 26.0, 25.0, 19.2, 17.6. HRMS-ESI: calcd for  $\text{C}_{15}\text{H}_{22}\text{N}^+$  ( $[\text{M} + \text{H}^+]$ )  $m/z$  216.1747, found 216.1740.

### 2-isopropyl-3,3a,4,5-tetrahydro-2H-benzo[g]indole

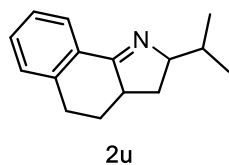

Purified by column chromatography (PE/EA = 20:1), light yellow oil (19.4 mg, 91% yield), d.r. = 2.4:1.  $^1\text{H}$  NMR (400 MHz,  $\text{CDCl}_3$ )  $\delta$  8.15 – 7.94 (m, 1H), 7.35 – 7.02 (m, 3H), 4.11 (t,  $J = 7.2$  Hz, 0.3H), 3.65 – 3.53 (m, 0.7H), 3.03 – 2.87 (m, 1H), 2.87 – 2.73 (m, 2H), 2.23 – 2.09 (m, 1.7H), 2.08 – 1.96 (m, 0.3H), 1.94 – 1.74 (m, 1H), 1.60 – 1.48 (m, 1.3H), 1.23 – 1.16 (m, 0.6H), 1.07 (d,  $J = 6.8$  Hz, 2H), 0.92 (d,  $J = 6.8$  Hz, 1H), 0.85 (d,  $J = 6.8$  Hz, 2H), 0.81 (d,  $J = 6.8$  Hz, 1H).  $^{13}\text{C}$  NMR (100 MHz,  $\text{CDCl}_3$ )  $\delta$  172.9, 172.7, 140.9, 140.9, 130.5, 130.4, 130.4, 130.3, 128.8, 126.4, 126.3, 126.1, 125.9, 77.4, 77.2, 47.3, 46.7, 33.8, 33.4, 32.9, 31.9, 30.5, 30.1, 30.0, 29.7, 20.6, 19.8, 18.7, 18.4. HRMS-ESI: calcd for  $\text{C}_{15}\text{H}_{20}\text{N}^+$  ( $[\text{M} + \text{H}^+]$ )  $m/z$  214.1590, found 214.1582.

### (3aR)-2-phenyl-3a,4,5,6,7,7a-hexahydro-3H-indole

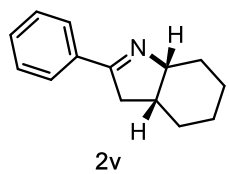

Purified by column chromatography (PE/EA = 20:1), colorless oil (17.3 mg, 87% yield).  $^1\text{H}$  NMR (400 MHz,  $\text{CDCl}_3$ )  $\delta$  7.85 – 7.65 (m, 2H), 7.45 – 7.25 (m, 3H), 3.91 (dd,  $J = 14.4, 6.8$  Hz, 1H), 2.82 (ddd,  $J = 16.0, 7.2, 1.6$  Hz, 1H), 2.64 (dd,  $J = 16.0, 4.4$  Hz, 1H), 2.40 – 2.20 (m, 1H), 1.83 (dd,  $J = 12.0, 5.6$  Hz, 2H), 1.72 – 1.46 (m, 2H), 1.43 – 1.36 (m, 2H), 1.32 – 1.21 (m, 2H).  $^{13}\text{C}$  NMR (100 MHz,  $\text{CDCl}_3$ )  $\delta$  173.5, 135.3, 130.3, 128.4, 127.4, 70.0, 41.5, 36.9, 29.2, 27.4, 23.0, 22.1. HRMS-ESI: calcd for  $\text{C}_{14}\text{H}_{18}\text{N}^+$  ( $[\text{M} + \text{H}^+]$ )  $m/z$  200.1434, found 200.1425.

### 3.8 Unsuccessful oximes

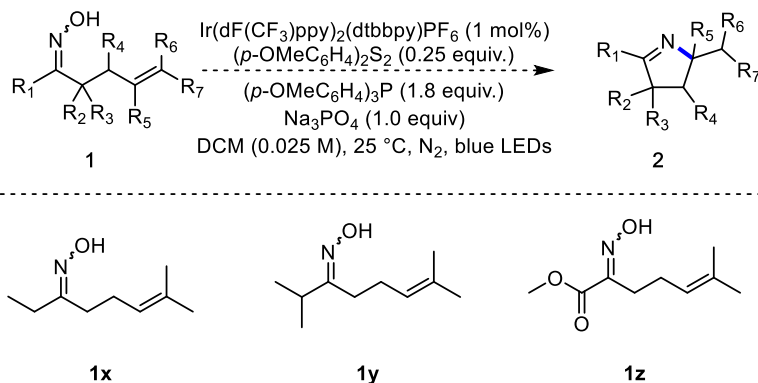

### 3.9 Further transformation of the products

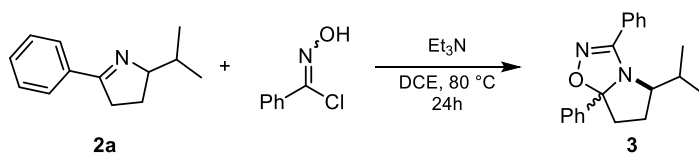

To an oven-dried tube, was added **2a** (56.1 mg, 0.3 mmol), *N*-hydroxybenzimidoyl chloride (93.3 mg, 0.6 mmol) and triethylamine (60.6 mg, 0.6 mmol). The system was evacuated and backfilled with N<sub>2</sub> for 3 time. Dry 1,2-dichloroethane (DCE) (3 mL) was added. The reaction mixture was stirred for 24 hours at 80 °C. Then the crude product was purified by column chromatography on silica gel, eluting with petroleum ether–EtOAc (20:1) to give the **3** (68.9 mg, 75% yield), d.r. > 19:1.

### 5-isopropyl-3,7a-diphenyl-5,6,7,7a-tetrahydropyrrolo[1,2-*d*][1,2,4]oxadiazole

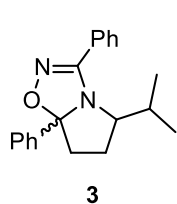

Purified by column chromatography (PE/EA = 20:1), yellow oil (68.9 mg, 75% yield), d.r. > 19:1. <sup>1</sup>H NMR (400 MHz, CDCl<sub>3</sub>) δ 7.83 (d, *J* = 7.2 Hz, 2H), 7.66 (d, *J* = 8. Hz, 2H), 7.52 – 7.35 (m, 5H), 7.34 – 7.26 (m, 1H), 3.27 (t, *J* = 7.6 Hz, 1H), 2.67 (dd, *J* = 14.0, 7.6 Hz, 1H), 2.52 – 2.33 (m, 1H), 2.10 – 1.93 (m, 2H), 1.88 – 1.73 (m, 1H), 1.00 (d, *J* = 6.8 Hz, 3H), 0.85 (d, *J* = 6.8 Hz, 3H). <sup>13</sup>C NMR (100 MHz, CDCl<sub>3</sub>) δ 160.1, 142.8, 130.6, 128.6, 128.6, 128.4, 128.2, 127.3, 125.5, 109.7, 71.7, 38.6, 31.2, 26.6, 21.2, 19.0. HRMS-ESI: calcd for C<sub>20</sub>H<sub>23</sub>N<sub>2</sub>O<sup>+</sup> ([M + H<sup>+</sup>]) *m/z* 307.1805, found 307.1806.



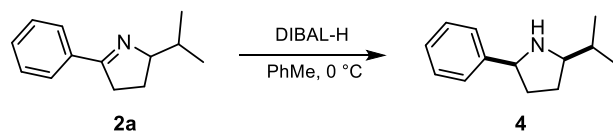

A dry tube equipped with a stirring bar was charged with **2a** (37.4 mg, 0.2 mmol) and then the tube was evacuated and refilled with N<sub>2</sub> (× 3). Dry toluene (2.8 mL) was added and the mixture was cooled to 0 °C. Then diisobutylaluminium hydride (1.0 M solution in hexane, 0.6 mL, 0.6 mmol) was added by dropwise. The mixture was stirred for 1 hour at 0 °C. Then the reaction was quenched with saturated aqueous NH<sub>4</sub>Cl, extracted with DCM (5 mL × 3). The organic layers were separated and dried over Na<sub>2</sub>SO<sub>4</sub>. Finally, the crude product was purified by column chromatography on silica gel, eluting with petroleum ether–EtOAc (1:1) to give the **4** (37.1 mg, 98% yield).

### 2-isopropyl-5-phenylpyrrolidine

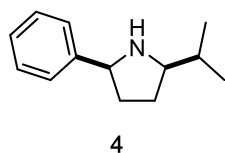

Purified by column chromatography (PE/EA = 1:1), colorless oil (37.1 mg, 98% yield), d.r. > 19:1. <sup>1</sup>H NMR (400 MHz, CDCl<sub>3</sub>) δ 7.40 (d, *J* = 7.6 Hz, 2H), 7.31 (t, *J* = 7.6 Hz, 2H), 7.22 (t, *J* = 7.2 Hz, 1H), 4.13 (t, *J* = 7.6 Hz, 1H), 2.87 (q, *J* = 7.6 Hz, 1H), 2.23 – 2.06 (m, 1H), 1.99 – 1.86 (m, 2H), 1.70 – 1.59 (m, 2H), 1.58 – 1.48 (m, 1H), 1.00 (d, *J* = 6.8 Hz, 3H), 0.94 (d, *J* = 6.8 Hz, 3H). <sup>13</sup>C NMR (100 MHz, CDCl<sub>3</sub>) δ 145.1, 128.3, 126.8, 126.7, 65.8, 62.6, 34.1, 29.3, 20.4, 19.8. HRMS-ESI: calcd for C<sub>13</sub>H<sub>20</sub>N<sup>+</sup> ([M + H<sup>+</sup>]) *m/z* 190.1590, found 190.1588.

2D NOESY  $^1\text{H}$  NMR reveals that there is a correlation between  $\text{H}^{\text{a}}$ / $\text{H}^{\text{b}}$ .

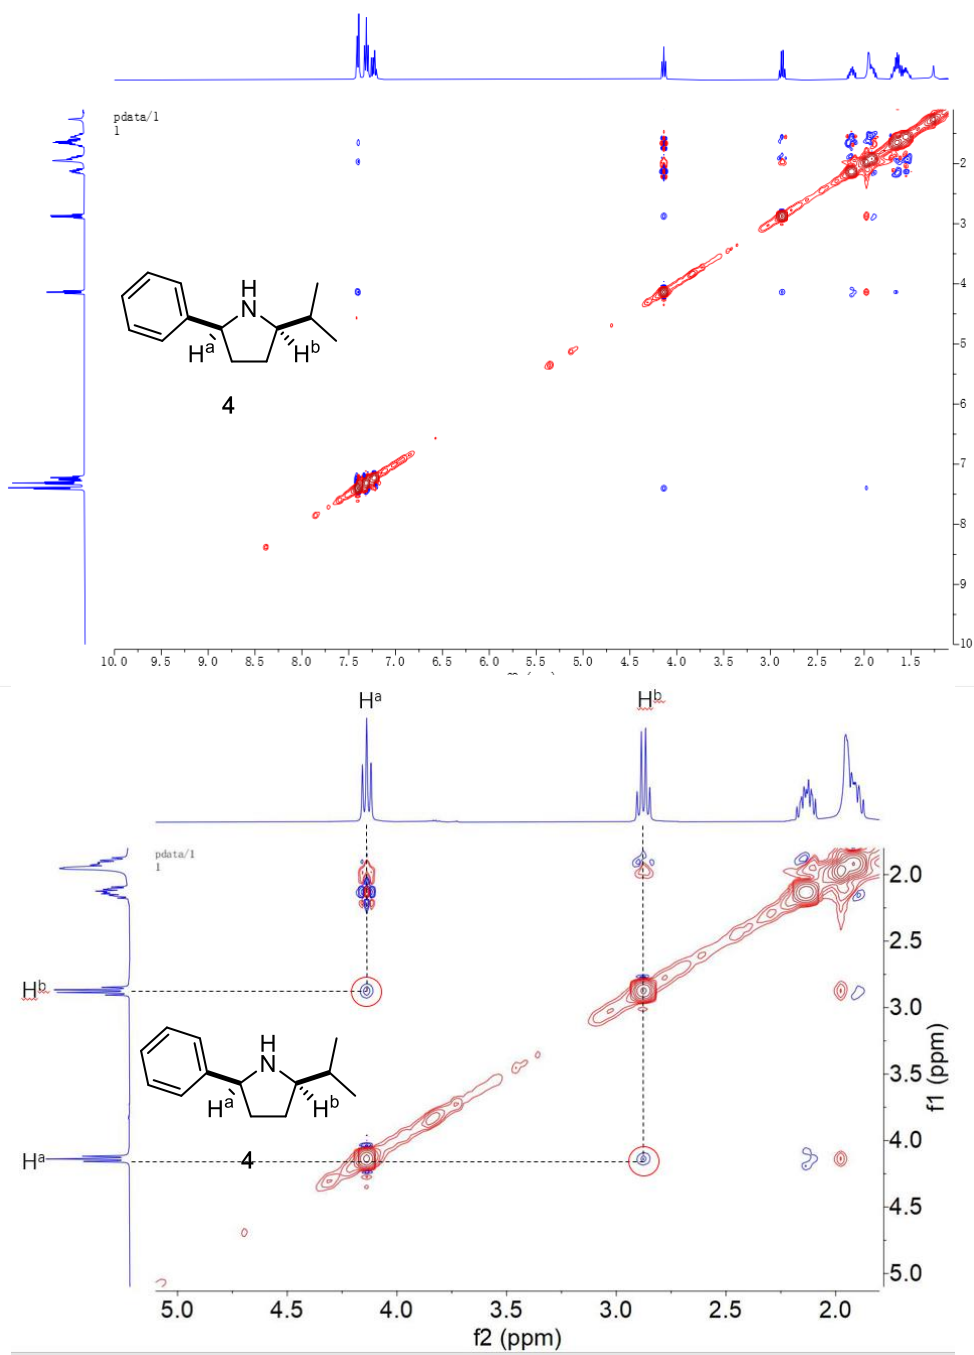

## 4. Mechanistic studies

### 4.1 Cyclic voltammetry experiments

Cyclic voltammograms were recorded using a CH Instruments 656E potentiostat and a glassy carbon working electrode, a Ag/AgCl reference electrode, and a Pt counter electrode. The voltammograms were recorded at room temperature under nitrogen atmosphere in 0.1 M tetrabutylammonium hexafluorophosphate in MeCN containing triaryl phosphines or oxime **1a** (1 mM). The scan rate was 100 mV s<sup>-1</sup>. All potentials are reported in V vs SCE. The potential of the Fc/Fc<sup>+</sup> redox couple, which was used as a standard, is 0.40 V vs SCE in acetonitrile under our conditions.<sup>12</sup>

**Table S8.** Oxidation potentials of compounds<sup>a</sup>

| entry          | Compounds                                            | $E_{p/2}$ |
|----------------|------------------------------------------------------|-----------|
| 1              | Ph <sub>3</sub> P                                    | 1.16      |
| 2              | (4-OMeC <sub>6</sub> H <sub>4</sub> ) <sub>3</sub> P | 0.87      |
| 3              | (4-MeC <sub>6</sub> H <sub>4</sub> ) <sub>3</sub> P  | 1.05      |
| 4              | (4-FC <sub>6</sub> H <sub>4</sub> ) <sub>3</sub> P   | 1.23      |
| 5              | <b>1a</b>                                            | 1.43      |
| 6 <sup>b</sup> | <b>1a</b> + Na <sub>3</sub> PO <sub>4</sub>          | 1.44      |

<sup>a</sup> All potentials are given in volts versus the saturated calomel electrode (SCE). Measurements were performed in MeCN at room temperature. <sup>b</sup> 1.0 equiv. of Na<sub>3</sub>PO<sub>4</sub> was added to the solution of **1a** in MeCN.

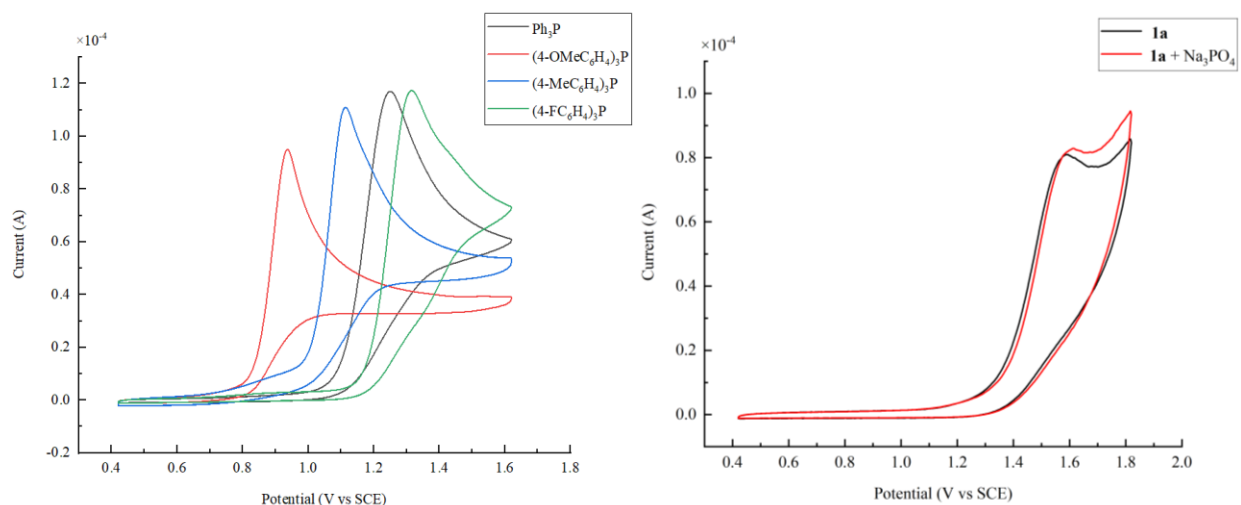

**Figure S5.** Cyclic voltammogram of triaryl phosphines and oxime **1a**.

#### 4.2 Luminescence quenching experiments

Emission spectra were recorded on an Edinburgh Analytical Instruments FLS 920 fluorescence spectrophotometer. Rigorously degassed solutions of each component were prepared under nitrogen atmosphere prior to each set of experiments. In a typical experiment, a  $2.5 \times 10^{-6}$  M solution of  $\text{Ir}(\text{dF}(\text{CF}_3)\text{ppy})_2(\text{dtbbpy})\text{PF}_6$  in DCM was added the appropriate amount of quencher in a quartz cuvette. The solutions were irradiated as a function of quencher concentration.<sup>13</sup>

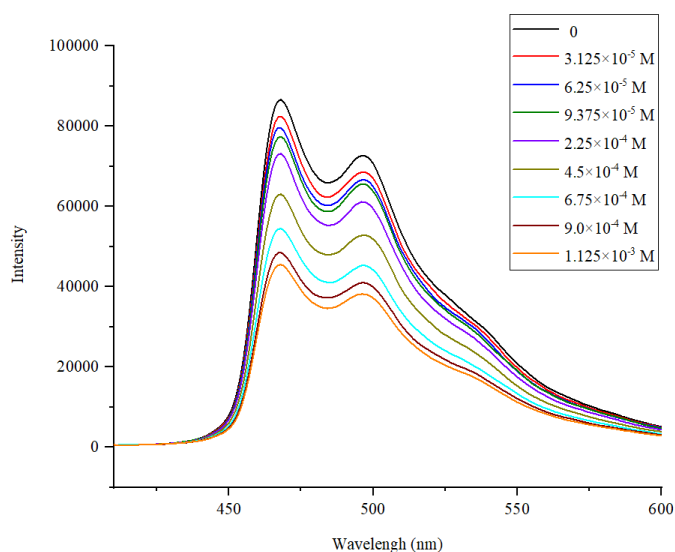

**Figure S6.** Luminescence quenching of  $\text{Ir}(\text{dF}(\text{CF}_3)\text{ppy})_2(\text{dtbbpy})\text{PF}_6$  by  $(p\text{-OMeC}_6\text{H}_4)_2\text{S}_2$ .

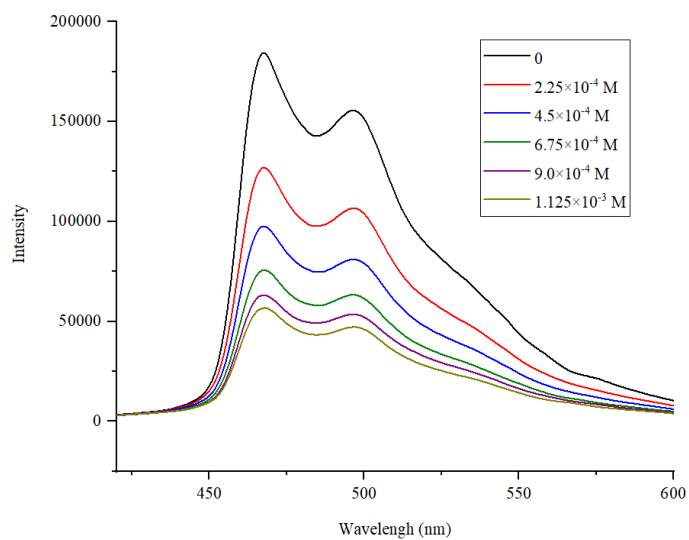

**Figure S7.** Luminescence quenching of  $\text{Ir}(\text{dF}(\text{CF}_3)\text{ppy})_2(\text{dtbbpy})\text{PF}_6$  by  $(p\text{-OMePh})_3\text{P}$ .

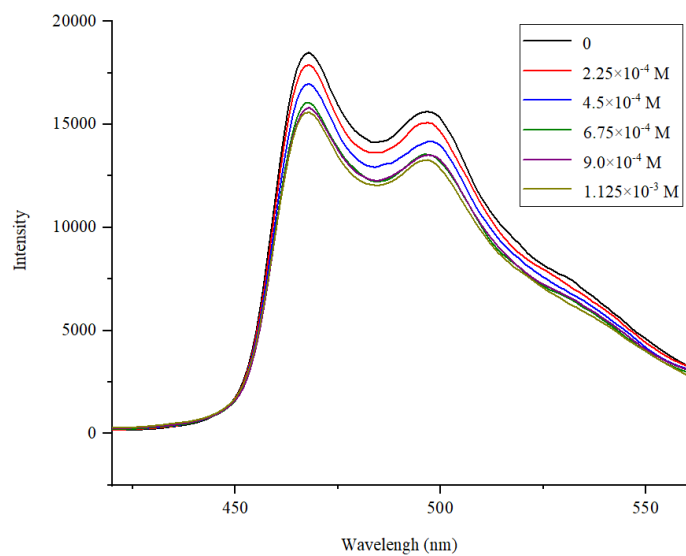

**Figure S8.** Luminescence quenching of  $\text{Ir}(\text{dF}(\text{CF}_3)\text{ppy})_2(\text{dtbbpy})\text{PF}_6$  by **1a**.

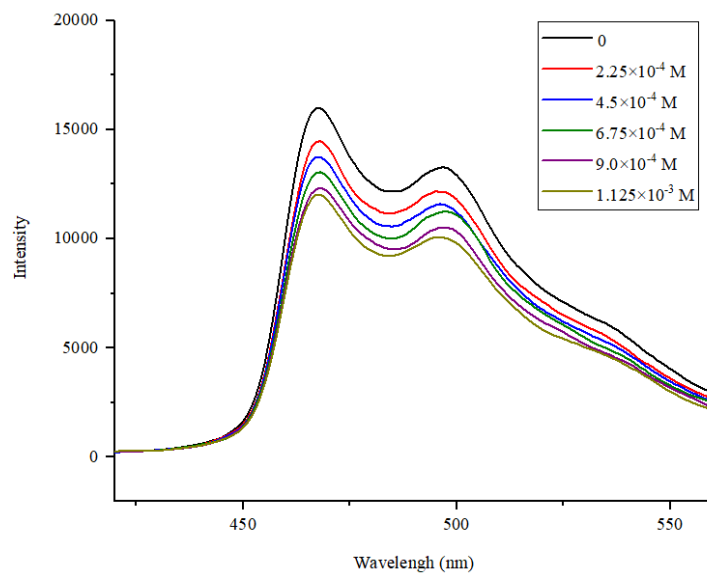

**Figure S9.** Luminescence quenching of Ir(dF(CF<sub>3</sub>)ppy)<sub>2</sub>(dtbbpy)PF<sub>6</sub> by **1a** + Na<sub>3</sub>PO<sub>4</sub>.

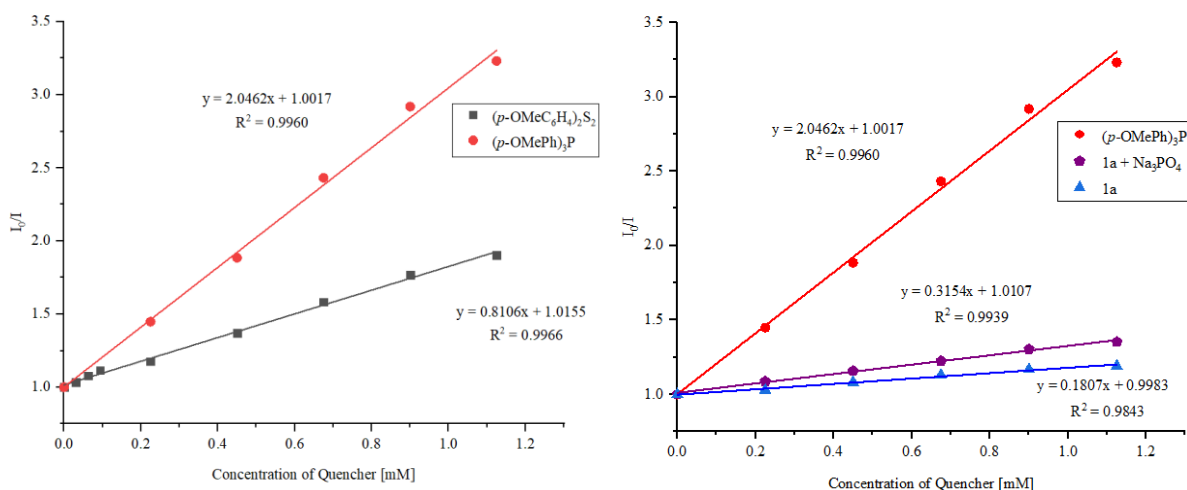

**Figure S10.** Stern-Volmer emission quenching of Ir(dF(CF<sub>3</sub>)ppy)<sub>2</sub>(dtbbpy)PF<sub>6</sub>.

These results suggested that (p-OMePh)<sub>3</sub>P could decrease the luminescence significantly compared with other components (Figure S10). In addition, we found that the solutions containing varying concentrations of oxime **1a** and Na<sub>3</sub>PO<sub>4</sub> (1:1), also resulted in a slight decrease in the emission intensity. These results suggested that O-centered radical may generated via PT/ET or PCET in the catalytic system (Scheme S1). According to a recent example, we could not rule out the formation of phosphoranyl radical via the addition of O-centered radical to PAR<sub>3</sub>.<sup>14</sup>

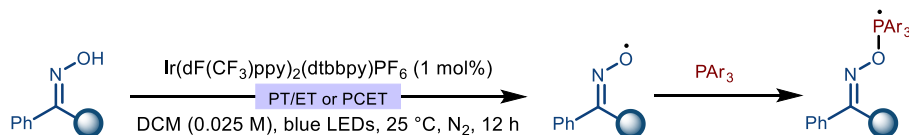

**Scheme S1.** The formation of phosphoranyl radical from O-centered radical.

### 4.3 Radical inhibiting experiment

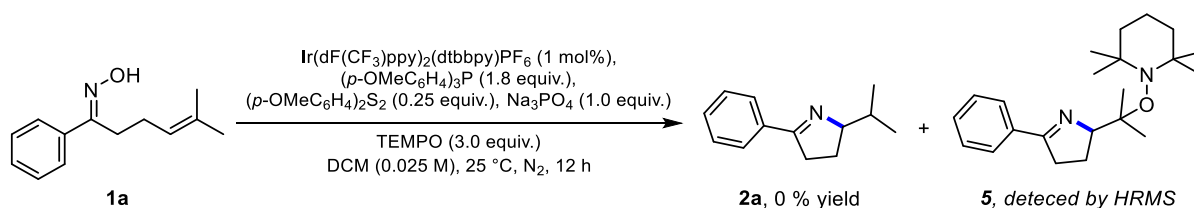

To an oven-dried reaction tube equipped with a stir bar was added **1a** (0.1 mmol, 1.0 equiv.), (*p*-OMeC<sub>6</sub>H<sub>4</sub>)<sub>2</sub>S<sub>2</sub> (0.025 mmol, 0.25 equiv.), (*p*-OMeC<sub>6</sub>H<sub>4</sub>)<sub>3</sub>P (0.18 mmol, 1.8 equiv.), Na<sub>3</sub>PO<sub>4</sub> (1.0 equiv.), TEMPO (0.3 mmol, 3.0 equiv.) and Ir(dF(CF<sub>3</sub>)ppy)<sub>2</sub>(dtbbpy)PF<sub>6</sub> (1 mol%). The tube was sealed and placed under nitrogen before DCM (4 mL) was added. The reaction mixture was irradiated by a 10 W blue LED at 25 °C for 12 hours. ESI-MS analysis of the crude reaction mixture was performed and the radical trapped product was successfully detected (**Figure S11**). HRMS-ESI: calcd for C<sub>22</sub>H<sub>35</sub>N<sub>2</sub>O<sup>+</sup> ([M + H<sup>+</sup>]) *m/z* 343.2744, found 343.2747.

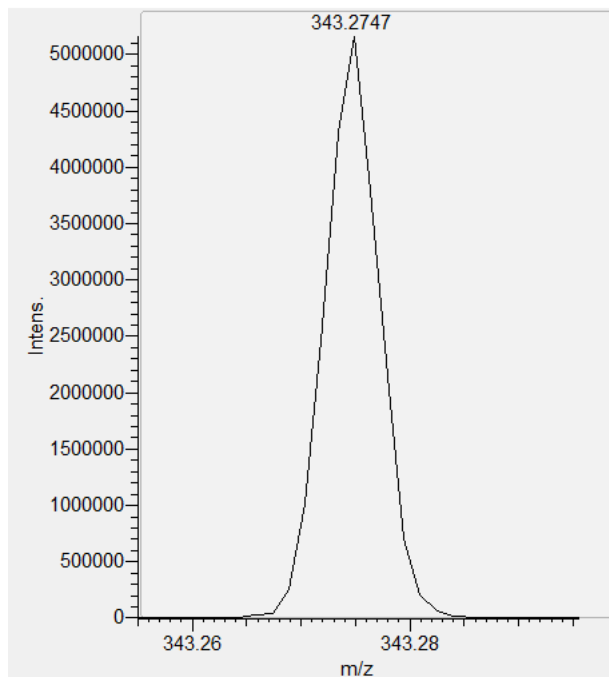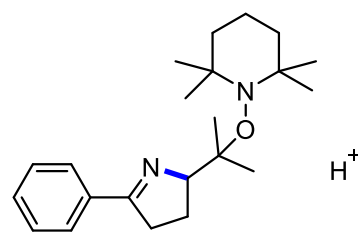

Chemical Formula:  $C_{22}H_{35}N_2O^+$   
Exact Mass: 343.2744

**Figure S11.** Crude ESI-MS of the TEMPO-trapping experiment.

## 4.4 Radical clock experiments

### 4.4.1 Synthesis of (1*E*,4*E*)-1-phenyl-5-(2-phenylcyclopropyl)pent-4-en-1-one oxime

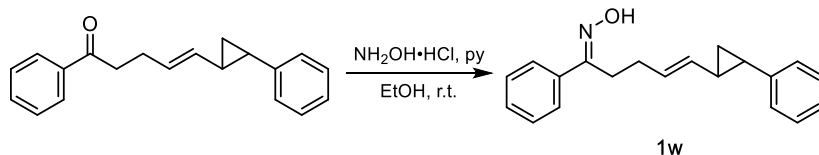

Add hydroxylamine hydrochloride (0.9 mmol) followed by pyridine (0.9 mmol) to a stirred solution of (*E*)-1-phenyl-5-(2-phenylcyclopropyl)pent-4-en-1-one<sup>15</sup> (0.83 mmol, 230 mg) in EtOH (2 mL). The reaction mixture was stirred for 2~4 hours at room temperature. Then the reaction was quenched with saturated aqueous  $NH_4Cl$ , extracted with EtOAc (5 mL  $\times$  3). The organic layers were separated and dried over  $Na_2SO_4$ . Finally, the crude product was purified by column chromatography on silica gel, eluting with petroleum ether–Et<sub>2</sub>O (20:1) to give the **1w** (180 mg, 95% yield).



### (1E,4E)-1-phenyl-5-(2-phenylcyclopropyl)pent-4-en-1-one oxime

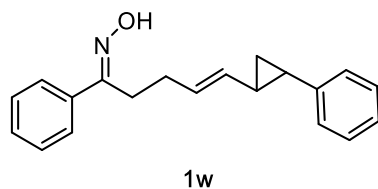

Purified by column chromatography (PE/EA = 20:1), white solid (180 mg, 95% yield), m.p. = 87.4 – 88.5 °C. <sup>1</sup>H NMR (400 MHz, CDCl<sub>3</sub>) δ 9.30 (br, 1H), 7.70 – 7.50 (m, 2H), 7.48 – 7.30 (m, 3H), 7.30 – 7.18 (m, 2H), 7.18 – 7.08 (m, 1H), 7.06 – 6.95 (m, 2H), 5.68 – 5.45 (m, 1H), 5.32 – 5.08 (m, 1H), 2.97 – 2.76 (m, 2H), 2.40 – 2.20 (m, 2H), 1.90 – 1.75 (m, 1H), 1.67 – 1.55 (m, 1H), 1.18 – 1.05 (m, 1H), 1.05 – 0.95 (m, 1H). <sup>13</sup>C NMR (100 MHz, CDCl<sub>3</sub>) δ 159.3, 142.6, 135.8, 133.1, 129.2, 128.6, 128.3, 127.6, 126.4, 125.7, 125.5, 29.1, 26.4, 26.3, 25.0, 16.6. HRMS-ESI: calcd for C<sub>20</sub>H<sub>22</sub>NO<sup>+</sup> ([M + H<sup>+</sup>]) *m/z* 292.1696, found 292.1689.

### 4.4.2 General procedure

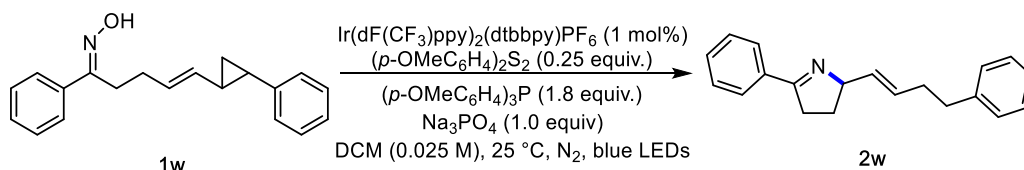

To an oven-dried reaction tube equipped with a stir bar was added **1w** (0.1 mmol, 1.0 equiv.), (*p*-OMeC<sub>6</sub>H<sub>4</sub>)<sub>2</sub>S<sub>2</sub> (0.025 mmol, 0.25 equiv.), (*p*-OMeC<sub>6</sub>H<sub>4</sub>)<sub>3</sub>P (0.18 mmol, 1.8 equiv.), Na<sub>3</sub>PO<sub>4</sub> (1.0 equiv.) and Ir(dF(CF<sub>3</sub>)ppy)<sub>2</sub>(dtbbpy)PF<sub>6</sub> (1 mol%). The tube was sealed and placed under nitrogen before DCM (4 mL) was added. The reaction mixture was irradiated by a 10 W blue LED at 25 °C for 12 hours. Then the reaction mixture was concentrated and purified through column chromatography to afford the desired product **2w** (2.7 mg, 10% yield).

### (E)-5-phenyl-2-(4-phenylbut-1-en-1-yl)-3,4-dihydro-2H-pyrrole

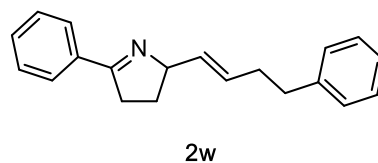

Purified by column chromatography (PE/EA = 20:1), light yellow oil (2.7 mg, 10% yield). <sup>1</sup>H NMR (400 MHz, CDCl<sub>3</sub>) δ 7.90 – 7.70 (m, 2H), 7.45 – 7.28 (m, 3H), 7.25 – 7.17 (m, 2H), 7.15 – 7.05 (m, 3H), 5.80 – 5.60 (m, 1H), 5.58 – 5.40 (m, 1H), 4.62 (dd, *J* = 14.4, 6.8 Hz, 1H), 3.05 – 2.90 (m, 1H), 2.90 – 2.75 (m, 1H), 2.73 – 2.57 (m, 2H), 2.42 – 2.25 (m, 2H), 2.25 – 2.11 (m, 1H), 1.72 – 1.62 (m, 1H). <sup>13</sup>C NMR (100 MHz, CDCl<sub>3</sub>) δ 173.1, 142.1, 134.4, 132.4, 130.6, 130.5, 128.5, 128.4, 128.3, 127.9, 125.8, 74.4, 35.7, 35.1, 34.4, 29.7. HRMS-ESI: calcd for C<sub>20</sub>H<sub>22</sub>N<sup>+</sup> ([M + H<sup>+</sup>]) *m/z* 276.1747, found 276.1738.

## 4.5 Oxidative quenching cycle

Given the fact that the disulfide could also quench the excited state of the iridium photocatalyst (Figure S12), an oxidative quenching cycle was proposed.

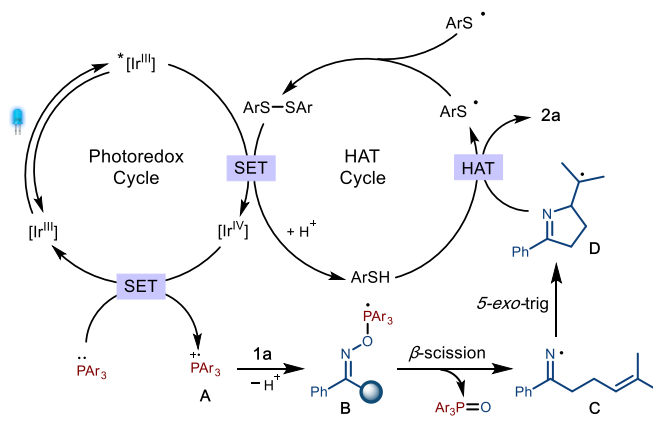

Figure S12. Oxidative quenching cycle.

## 5. References

- [1] Y. Liu, X.-L. Chen, X.-Y. Li, S.-S. Zhu, S.-J. Li, Y. Song, L.-B. Qu and B. Yu, *J. Am. Chem. Soc.*, 2021, **143**, 964–972.
- [2] X. Li, Y. Zhang, H. Chen, J. Sun and F. Feng, *ACS Appl. Mater. Interfaces*, 2016, **8**, 22756–22761.
- [3] M. S. Lowry, J. I. Goldsmith, J. D. Slinker, R. Rohl, R. A. Pascal, G. G. Malliaras and S. Bernhard, *Complex. Chem. Mater.*, 2005, **17**, 5712–5719.
- [4] K. Usami, E. Yamaguchi, N. Tada and A. Itoh, *Org. Lett.*, 2018, **20**, 5714–5717.
- [5] X. Peng, B. M. K. Tong, H. Hirao and S. Chiba, *Angew. Chem.* 2014, **126**, 1990–1993.
- [6] F. Chen, X.-L. Yang, Z.-W. Wu and B. Han, *J. Org. Chem.*, 2016, **81**, 3042–3050.
- [7] X.-X. Peng, Y.-J. Deng, X.-L. Yang, L. Zhang, W. Yu and B. Han, *Org. Lett.*, 2014, **16**, 4650–4653.
- [8] T. Cheng, S. Meng and Y. Huang, *Org. Lett.*, 2013, **15**, 1958–1961.
- [9] J. Davies, N. S. Sheikh and D. Leonori, *Angew. Chem. Int. Ed.*, 2017, **56**, 13361–13365.
- [10] C. Chen, Y. Bao, J. Zhao and B. Zhu, *Chem. Commun.*, 2019, **55**, 14697–14700.
- [11] J. Davies, S. G. Booth, S. Essafi, R. A. W. Dryfe and D. Leonori, *Angew. Chem. Int. Ed.*, 2015, **54**, 14017–14021.
- [12] L. Delfau, S. Nichilo, F. Molton, J. Broggi, E. Tomás-Mendivil and D. Martin, *Angew. Chem. Int. Ed.*, 2021, **60**, 26783–26789.
- [13] M. Jiang, H. Li, H. Yang and H. Fu, *Angew. Chem. Int. Ed.*, 2017, **129**, 892–897.
- [14] J.-B. Han, A. Guo and X.-Y. Tang, *Chem. Eur. J.* 2019, **25**, 2989–2994.
- [15] W.-D. Liu, W. Lee, H. Shu, C. Xiao, H. Xu, X. Chen, Kendall N. Houk and J. Zhao, *J. Am. Chem. Soc.*, 2022, **144**, 22767–22777.

## 6. Copy of $^1\text{H}$ NMR, $^{13}\text{C}$ and $^{19}\text{F}$ NMR spectra

$^1\text{H}$  NMR Spectrum of **1b** (400 MHz;  $\text{CDCl}_3$ )

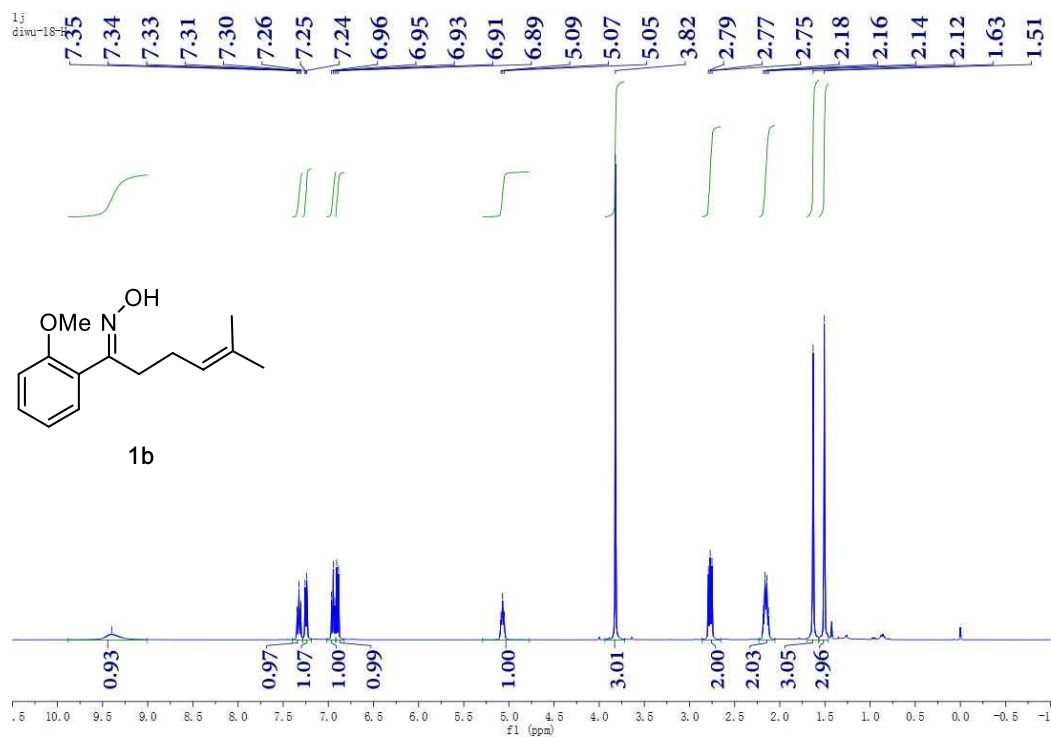

$^{13}\text{C}$  NMR Spectrum of **1b** (100 MHz;  $\text{CDCl}_3$ )

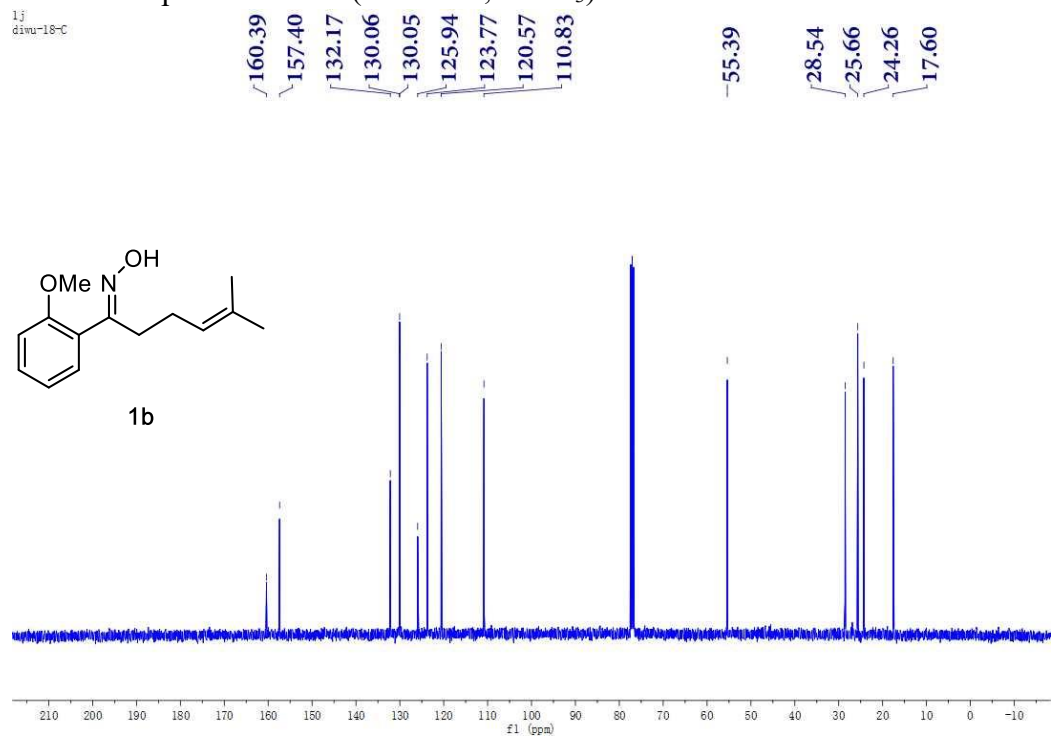

### <sup>1</sup>H NMR Spectrum of **1c** (400 MHz; CDCl<sub>3</sub>)

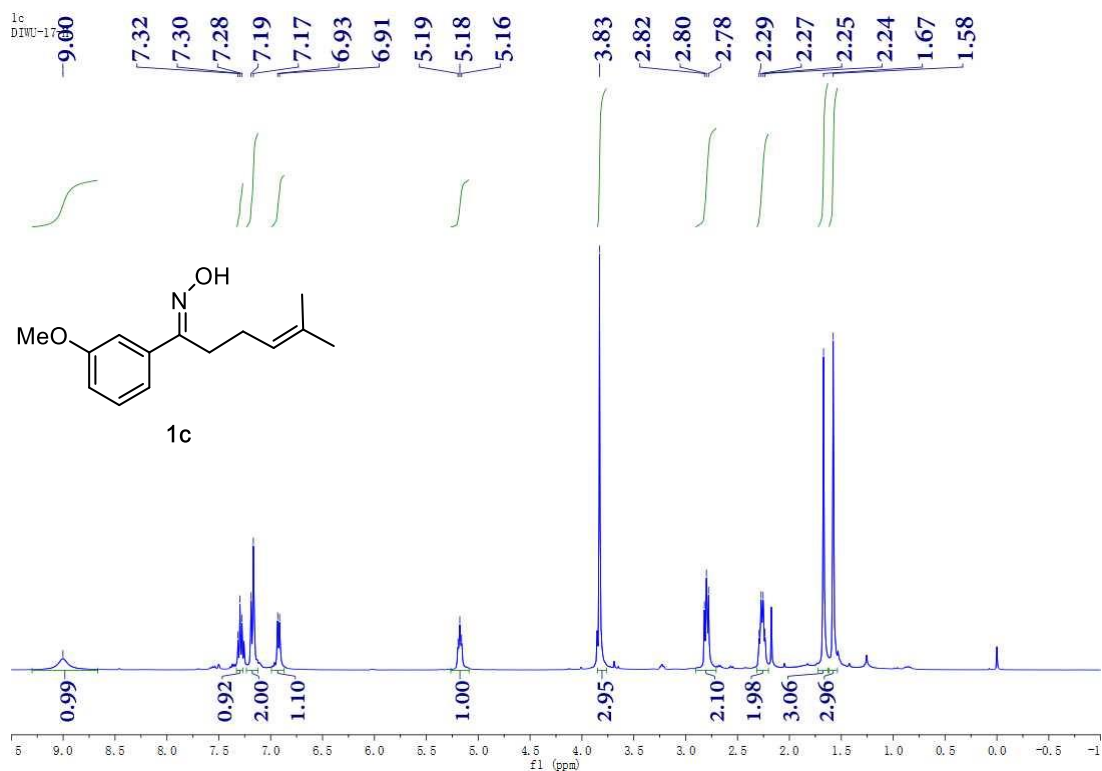

### <sup>13</sup>C NMR Spectrum of **1c** (100 MHz; CDCl<sub>3</sub>)

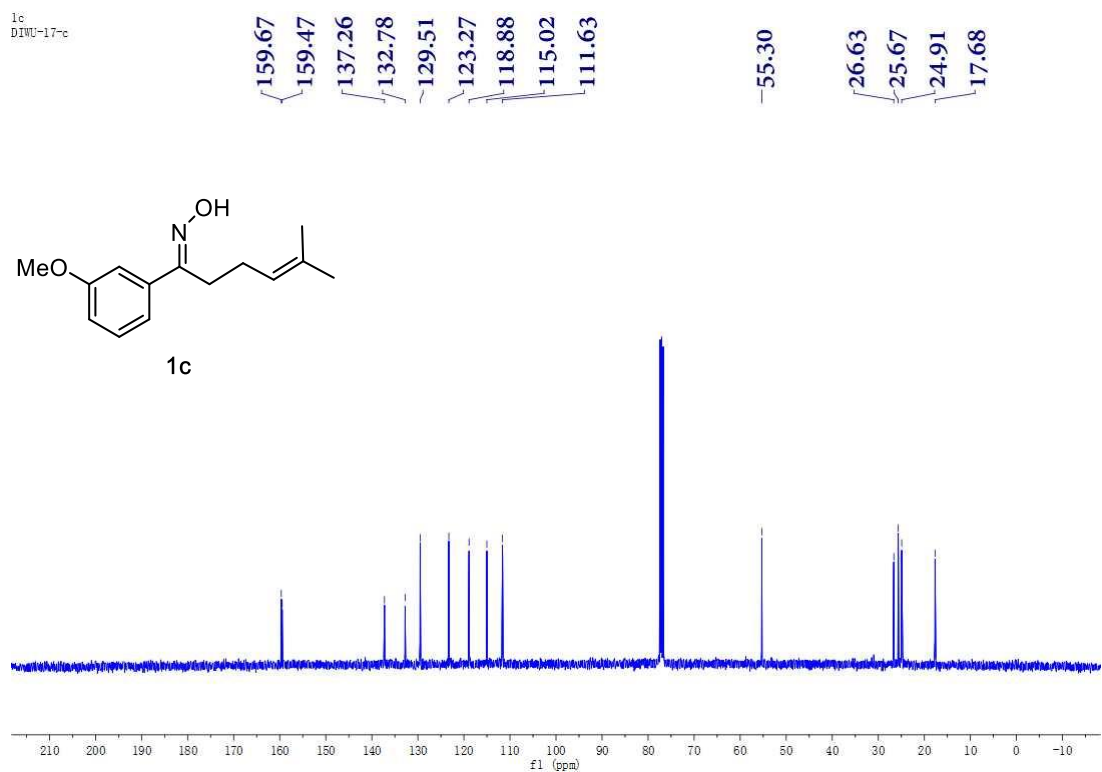

# <sup>1</sup>H NMR Spectrum of **1d** (400 MHz; CDCl<sub>3</sub>)

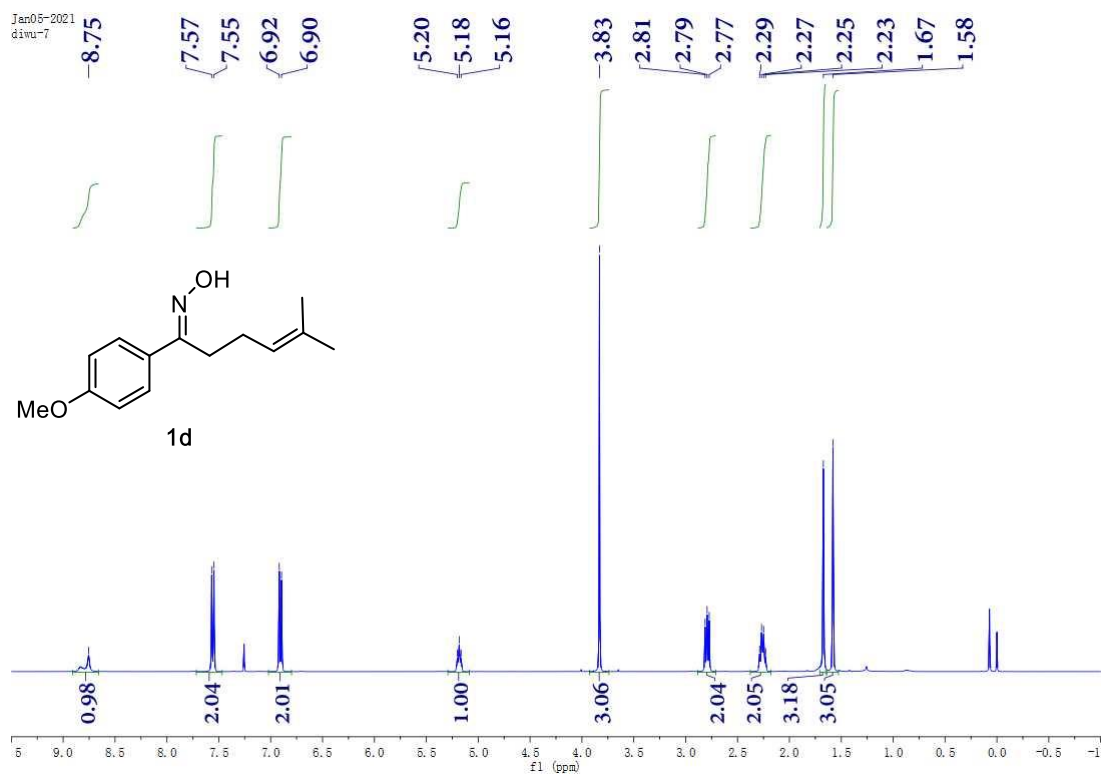

# <sup>13</sup>C NMR Spectrum of **1d** (100 MHz; CDCl<sub>3</sub>)

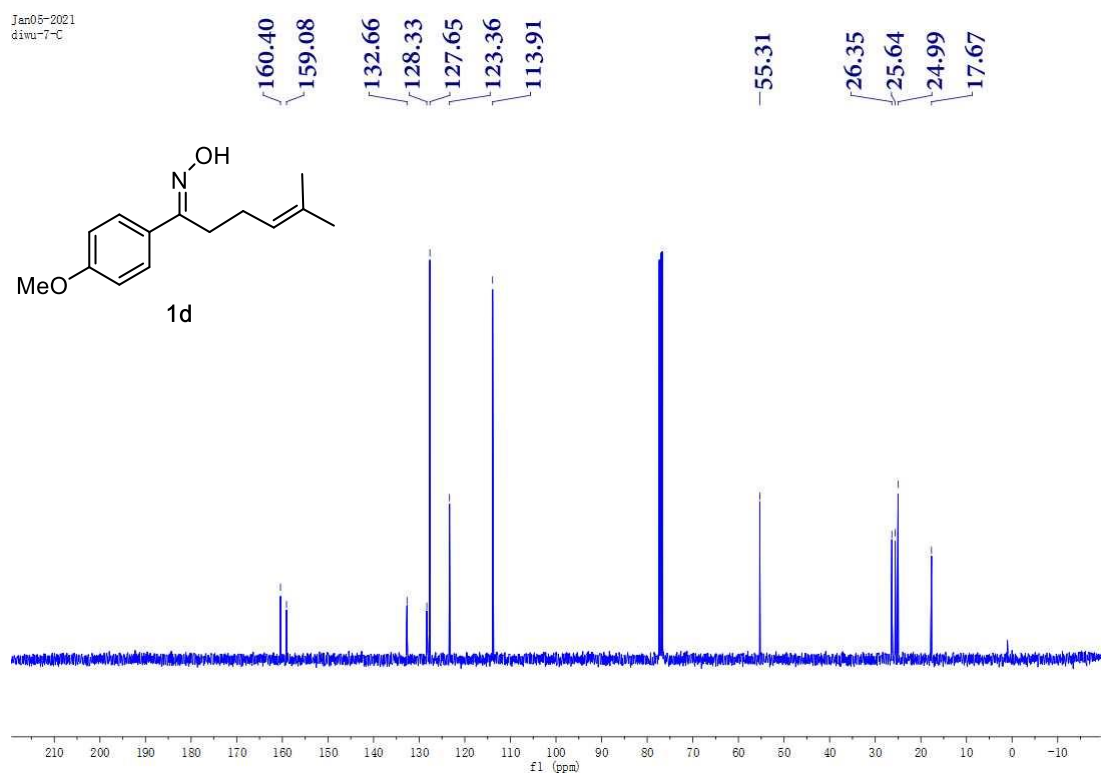

### <sup>1</sup>H NMR Spectrum of **1e** (400 MHz; CDCl<sub>3</sub>)

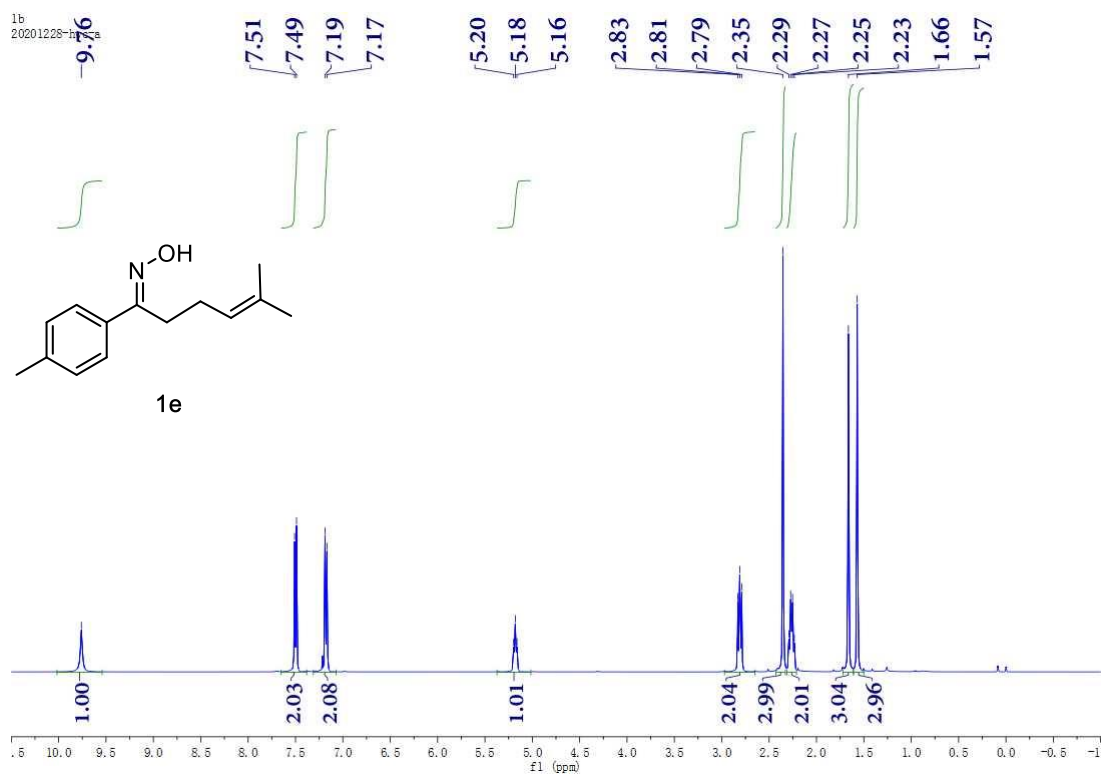

### <sup>13</sup>C NMR Spectrum of **1e** (100 MHz; CDCl<sub>3</sub>)

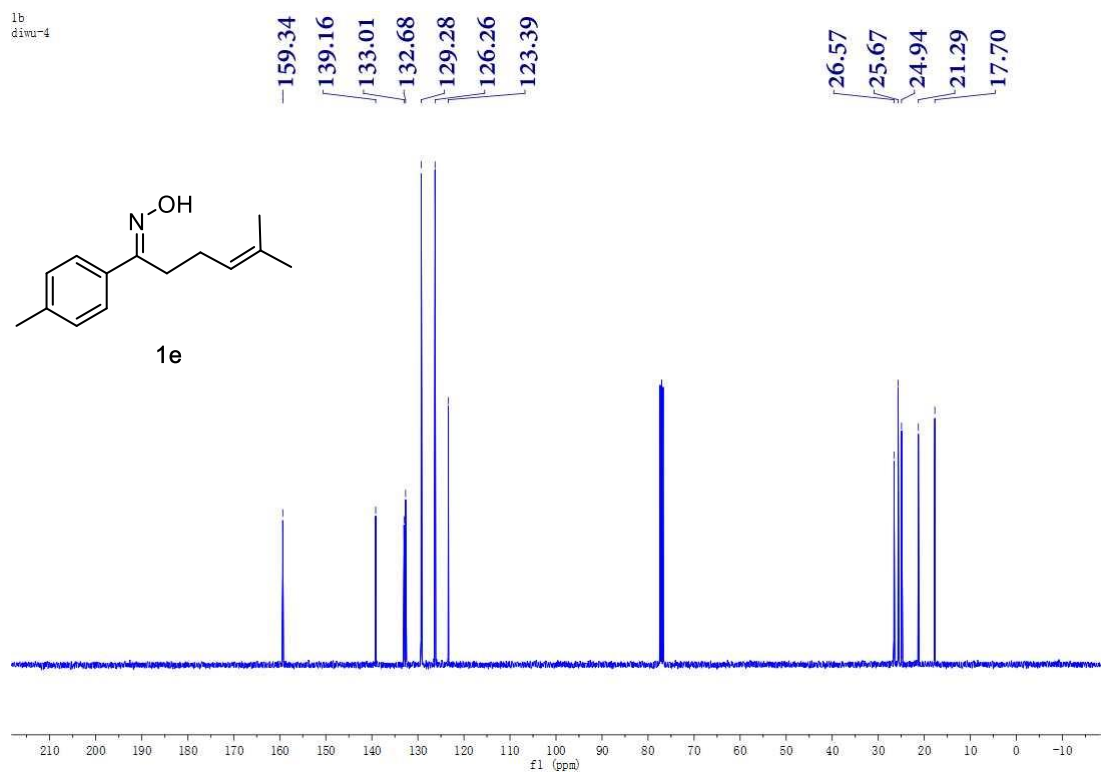

<sup>1</sup>H NMR Spectrum of **1f** (400 MHz; CDCl<sub>3</sub>)

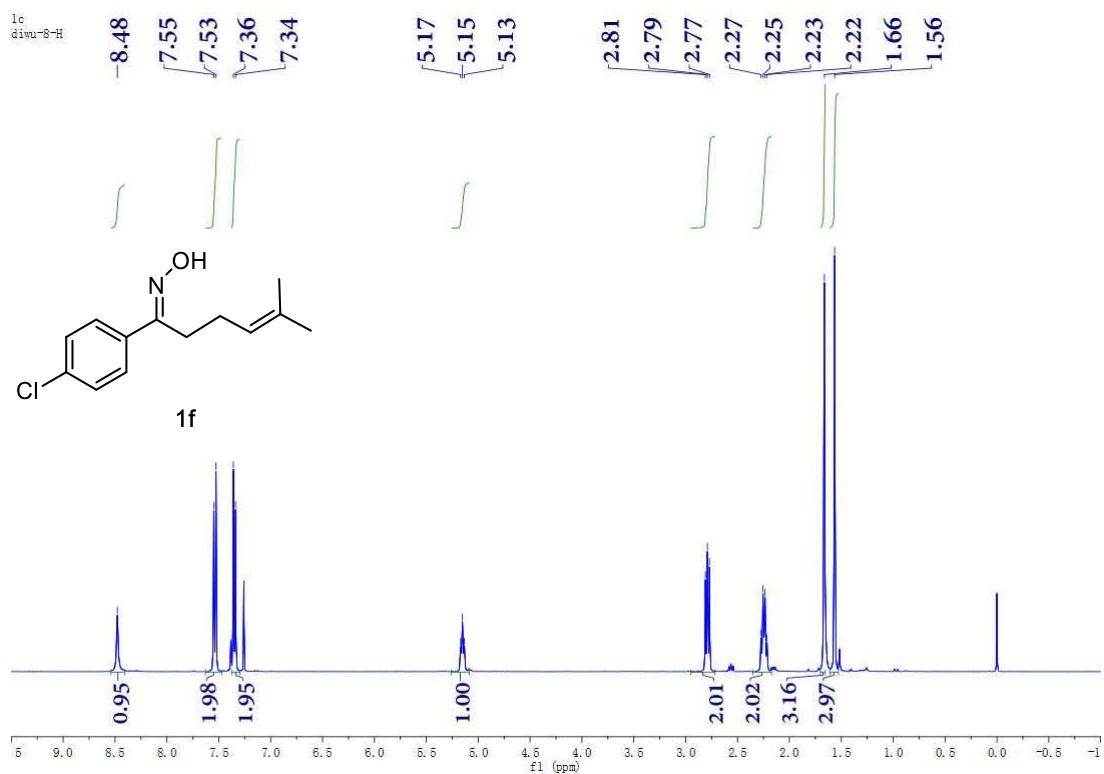

<sup>13</sup>C NMR Spectrum of **1f** (100 MHz; CDCl<sub>3</sub>)

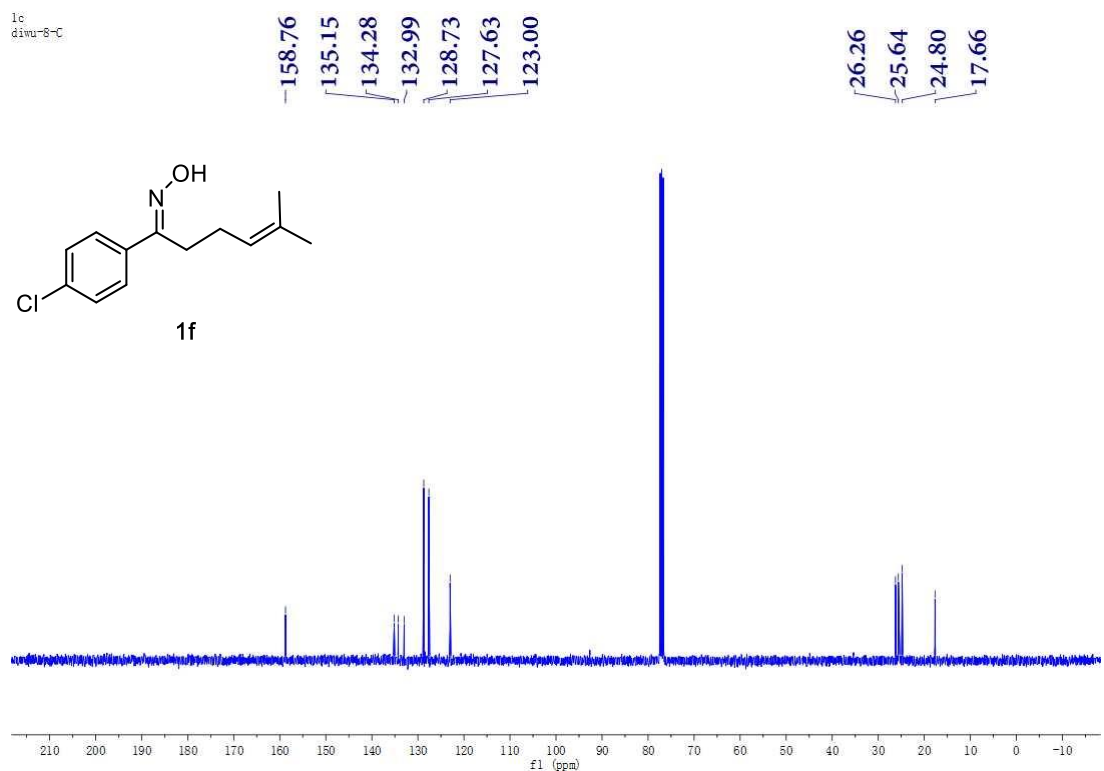



# <sup>1</sup>H NMR Spectrum of **1g** (400 MHz; CDCl<sub>3</sub>)

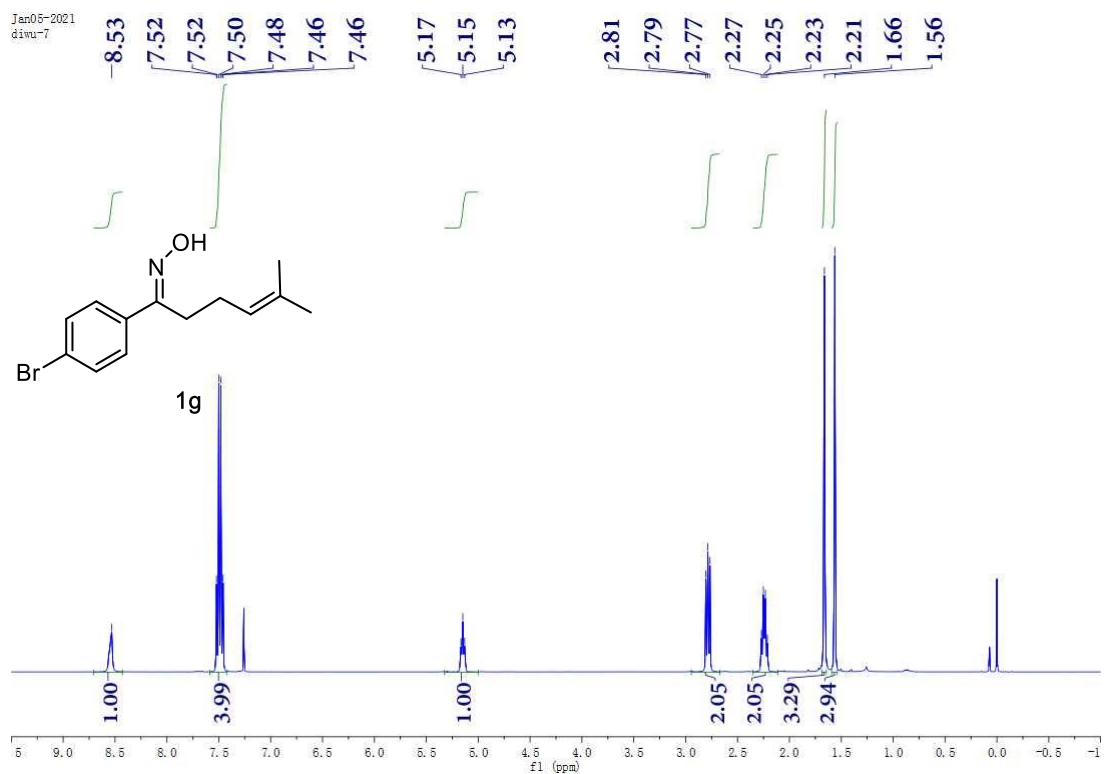

# <sup>13</sup>C NMR Spectrum of **1g** (100 MHz; CDCl<sub>3</sub>)

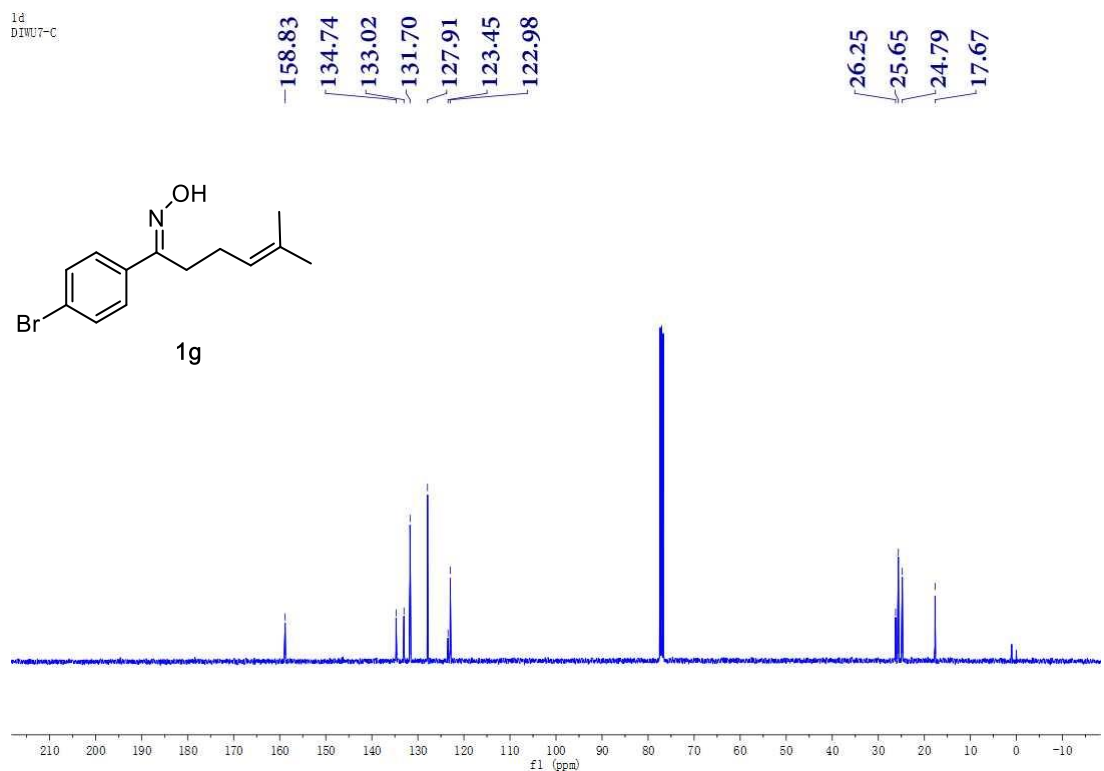

### <sup>1</sup>H NMR Spectrum of **1h** (400 MHz; CDCl<sub>3</sub>)

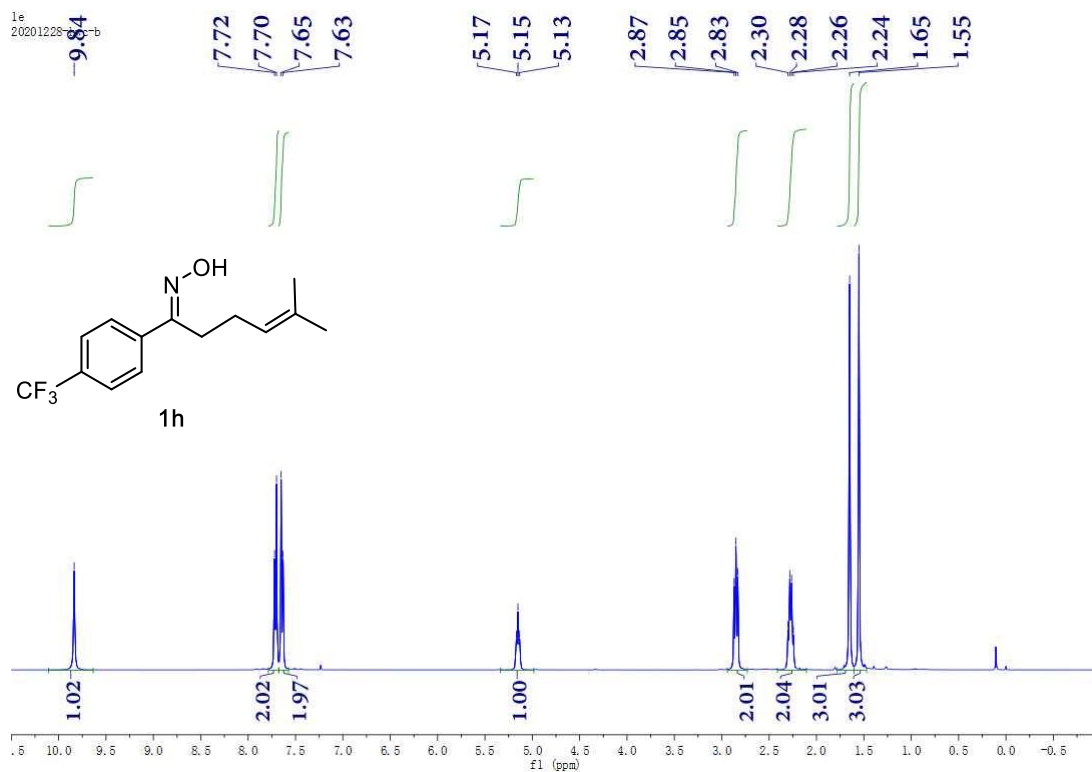

### <sup>13</sup>C NMR Spectrum of **1h** (100 MHz; CDCl<sub>3</sub>)

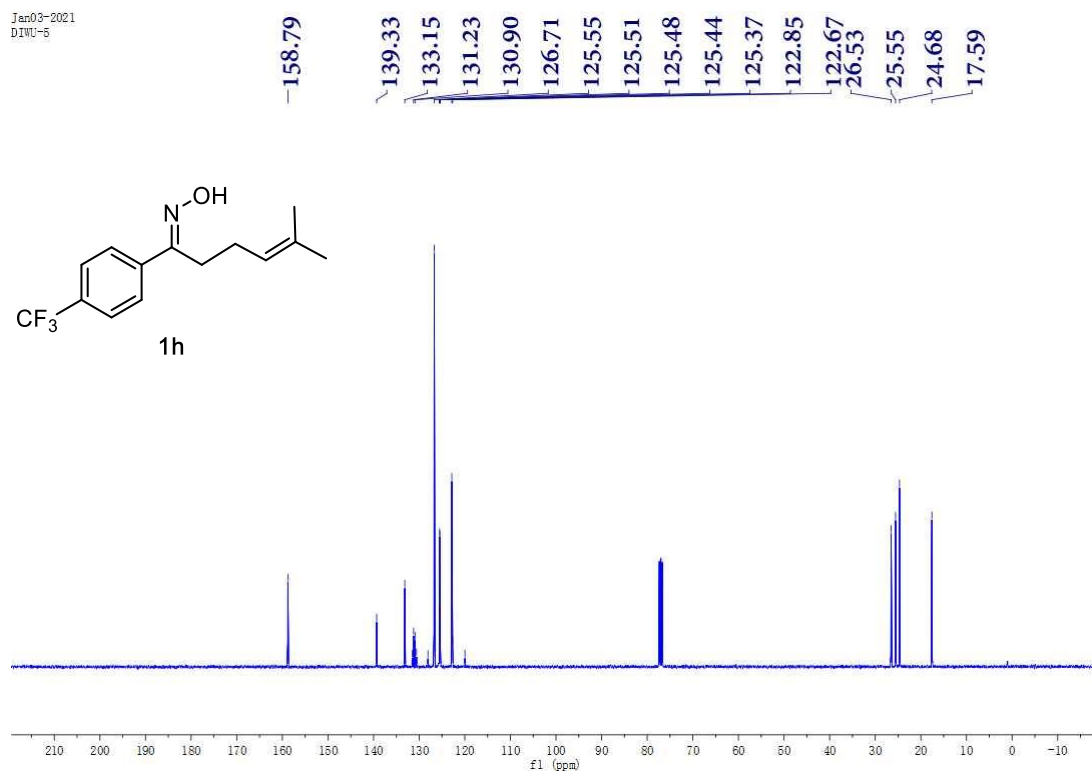

$^{19}\text{F}$  NMR Spectrum of **1h** (376 MHz;  $\text{CDCl}_3$ )

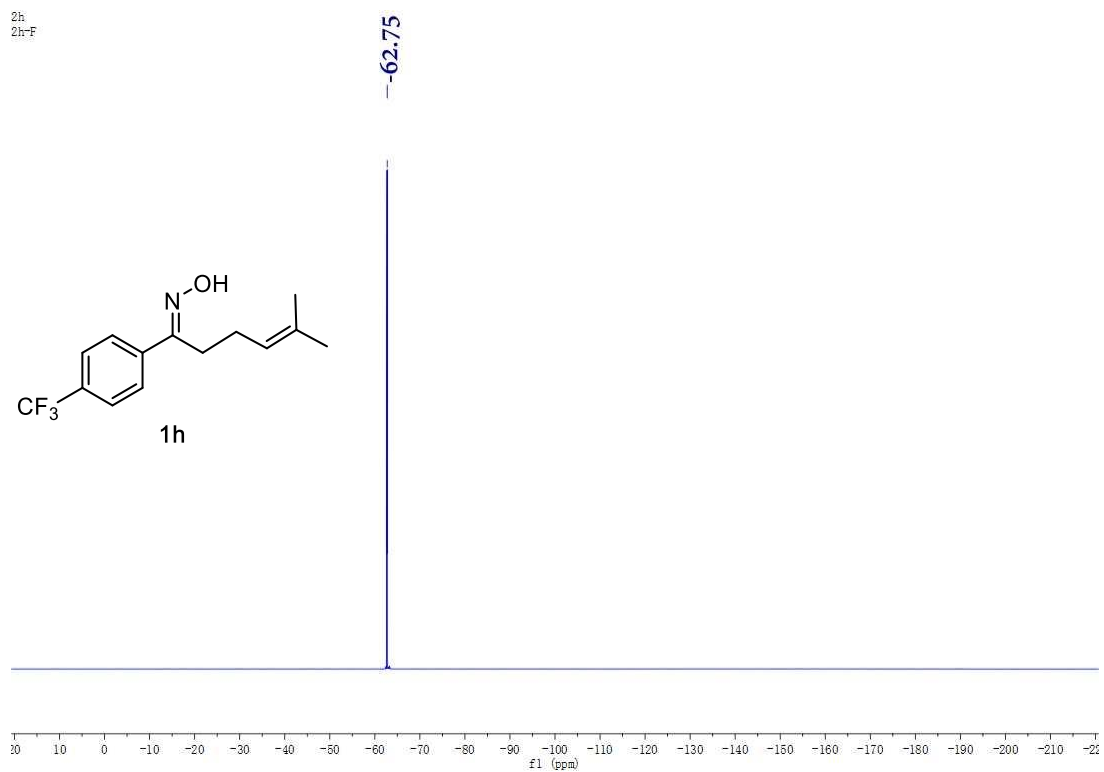

$^1\text{H}$  NMR Spectrum of **1i** (400 MHz;  $\text{CDCl}_3$ )

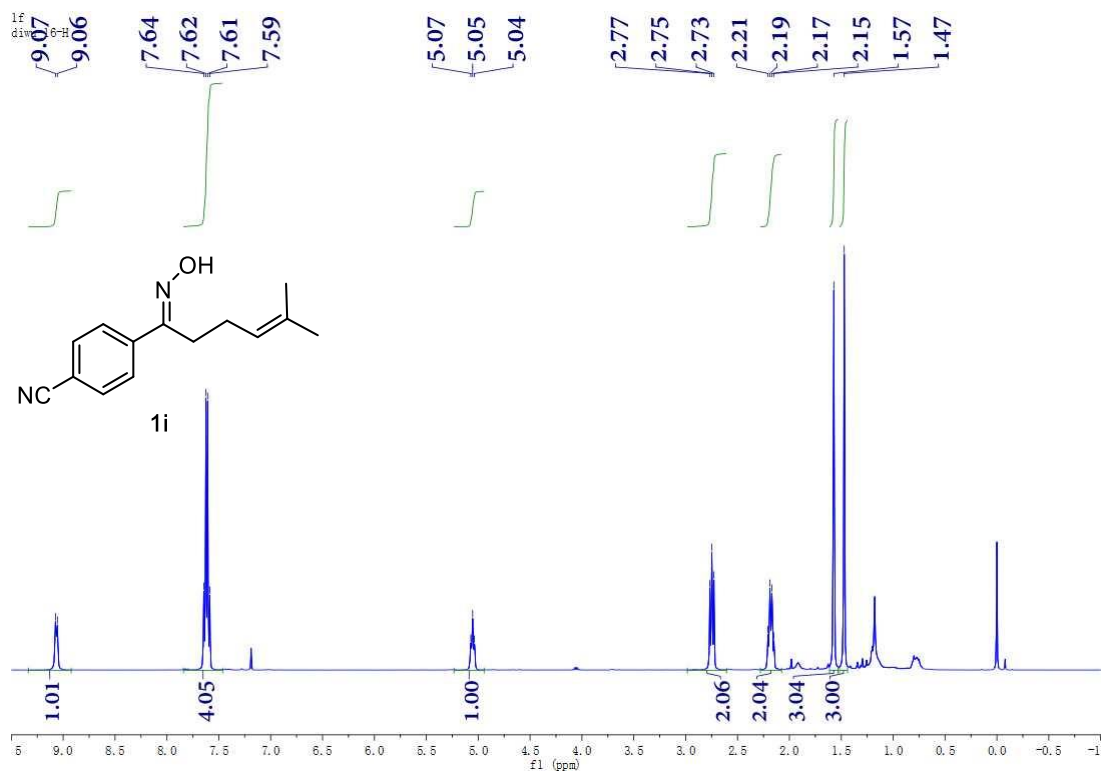

### $^{13}\text{C}$ NMR Spectrum of **1i** (100 MHz; $\text{CDCl}_3$ )

1f  
divu-16-c

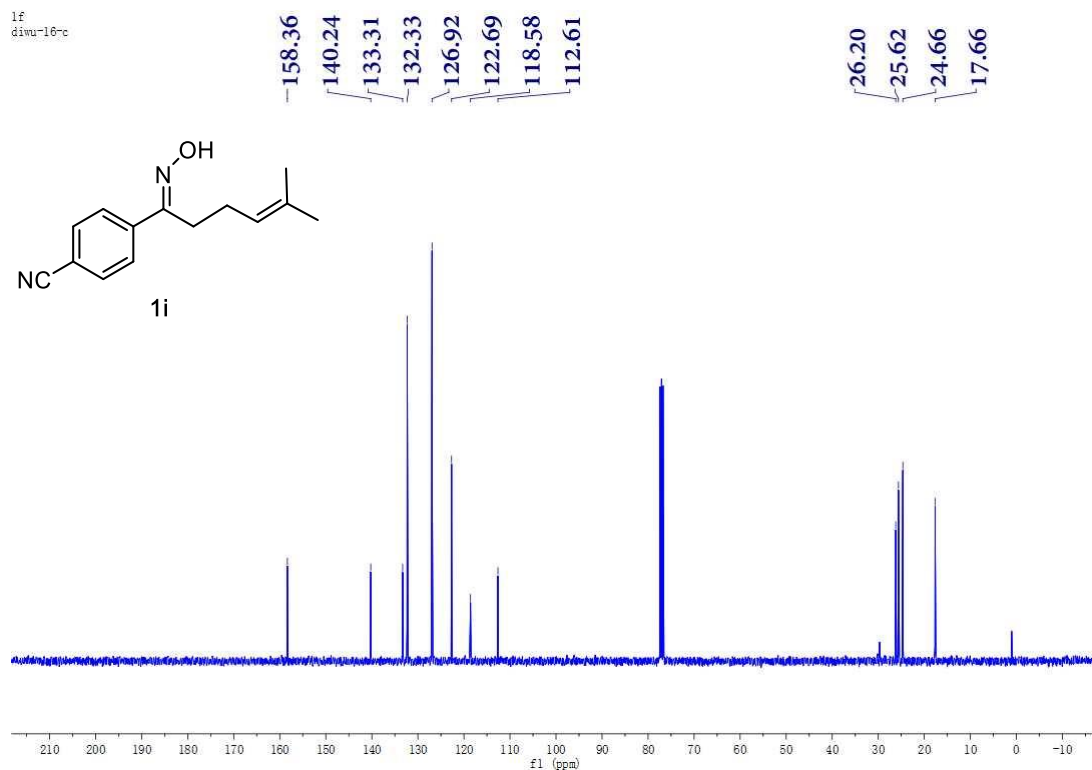

### $^1\text{H}$ NMR Spectrum of **1j** (400 MHz; $\text{CDCl}_3$ )

20221120-12  
divu-11-H

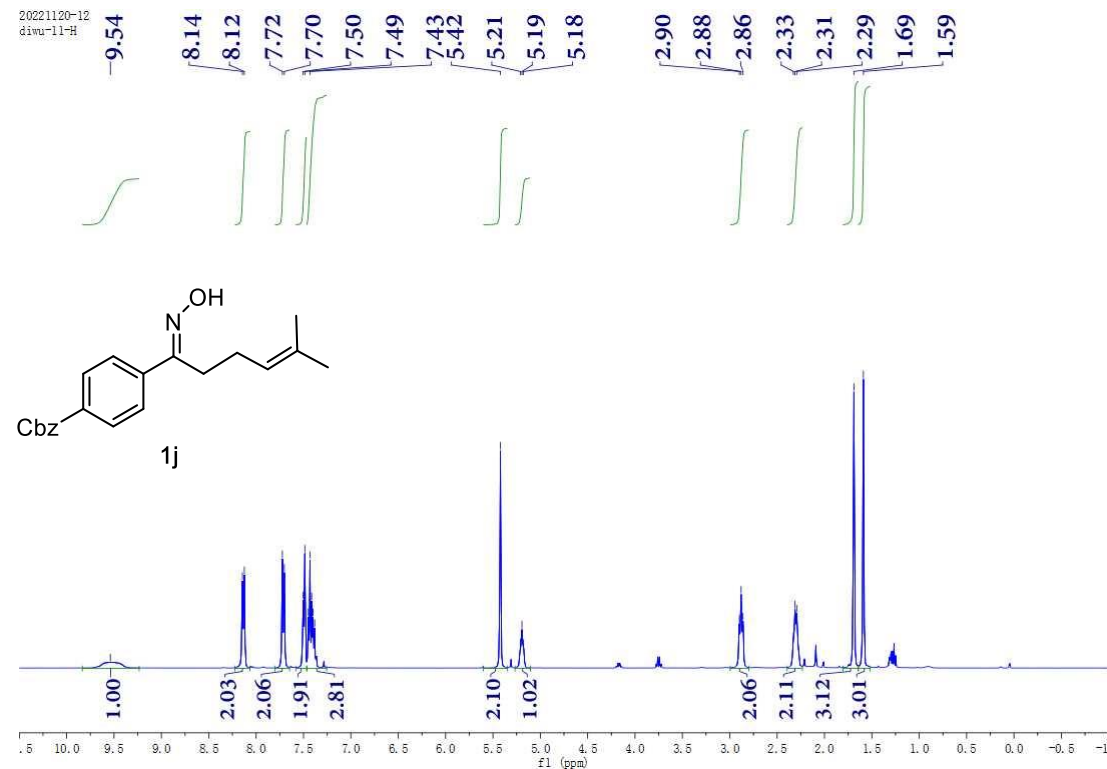

### <sup>13</sup>C NMR Spectrum of **1j** (100 MHz; CDCl<sub>3</sub>)

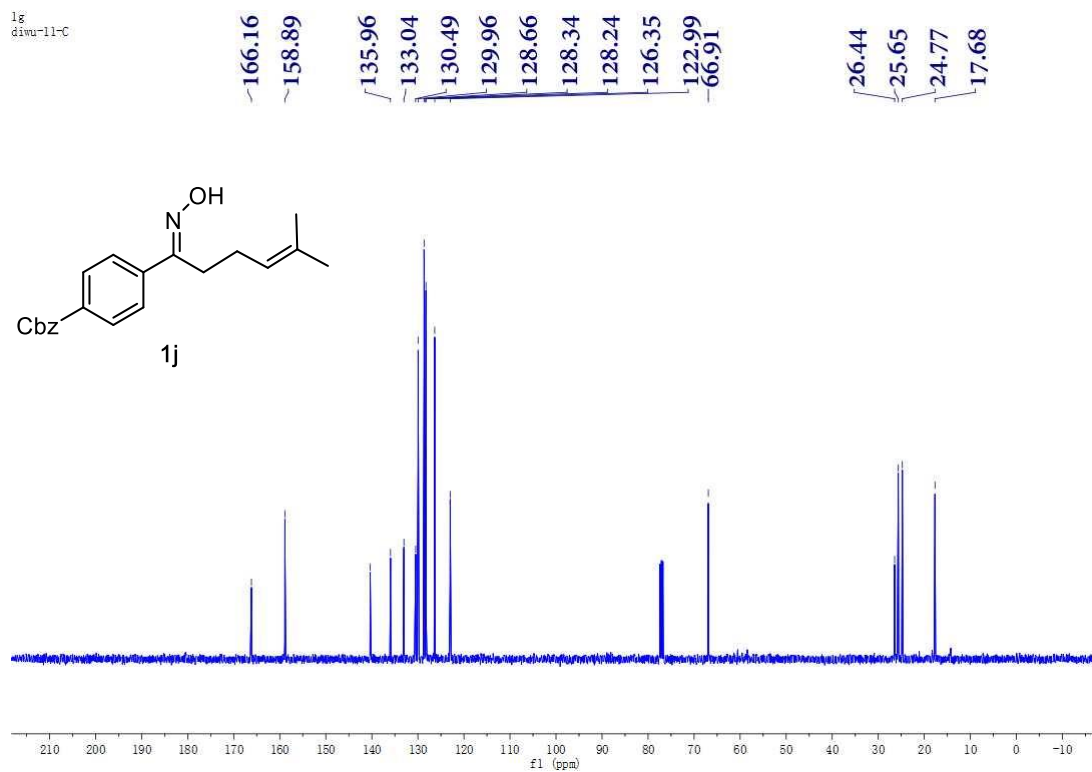

### <sup>1</sup>H NMR Spectrum of **1k** (400 MHz; CDCl<sub>3</sub>)

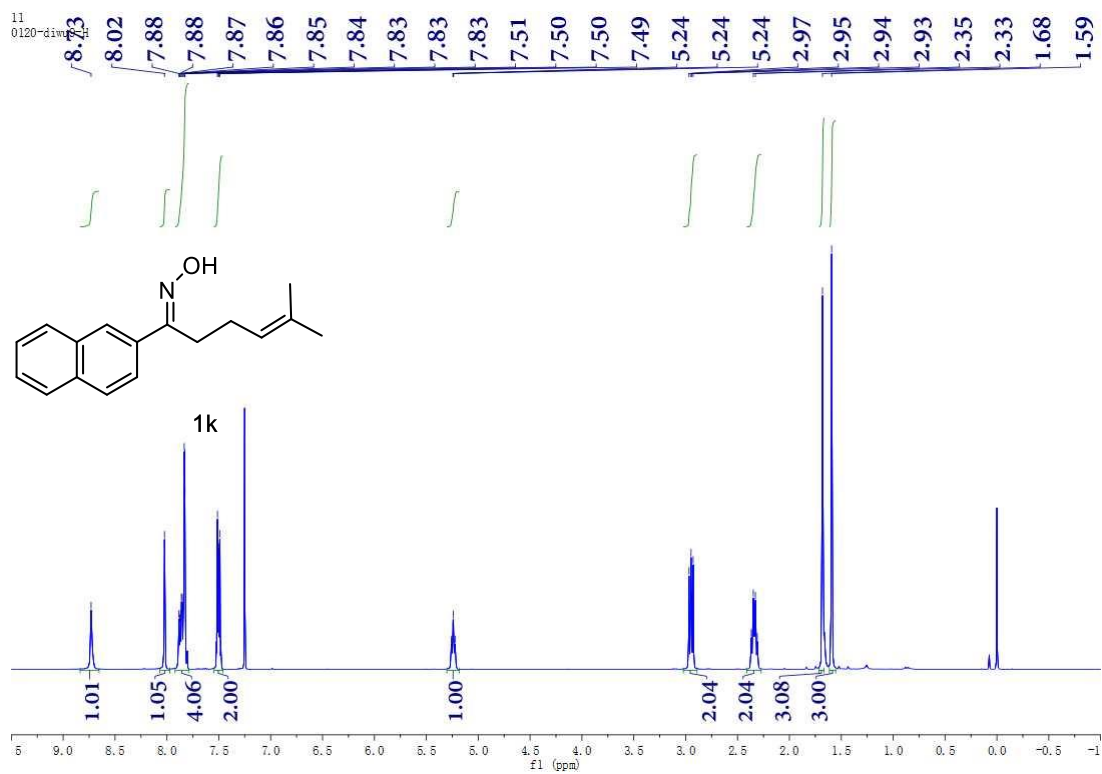

### $^{13}\text{C}$ NMR Spectrum of **1k** (100 MHz; $\text{CDCl}_3$ )

11  
0120-divu9-C

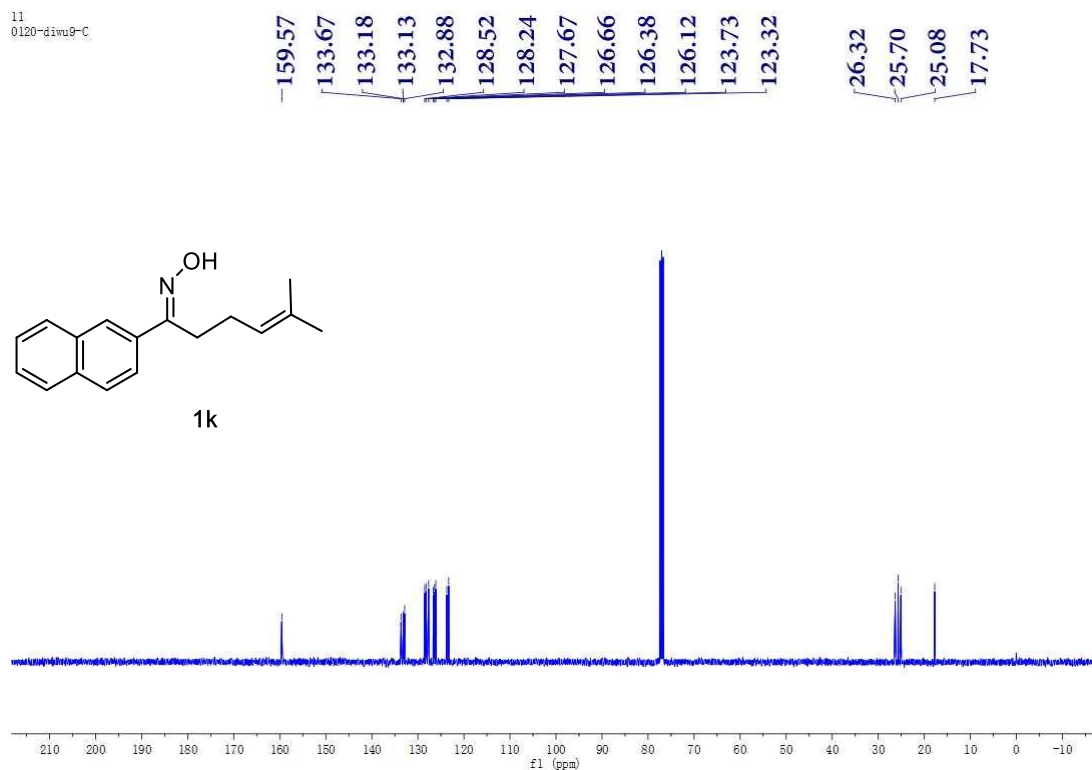

### $^1\text{H}$ NMR Spectrum of **1l** (400 MHz; $\text{CDCl}_3$ )

1k  
0120-divu9-C

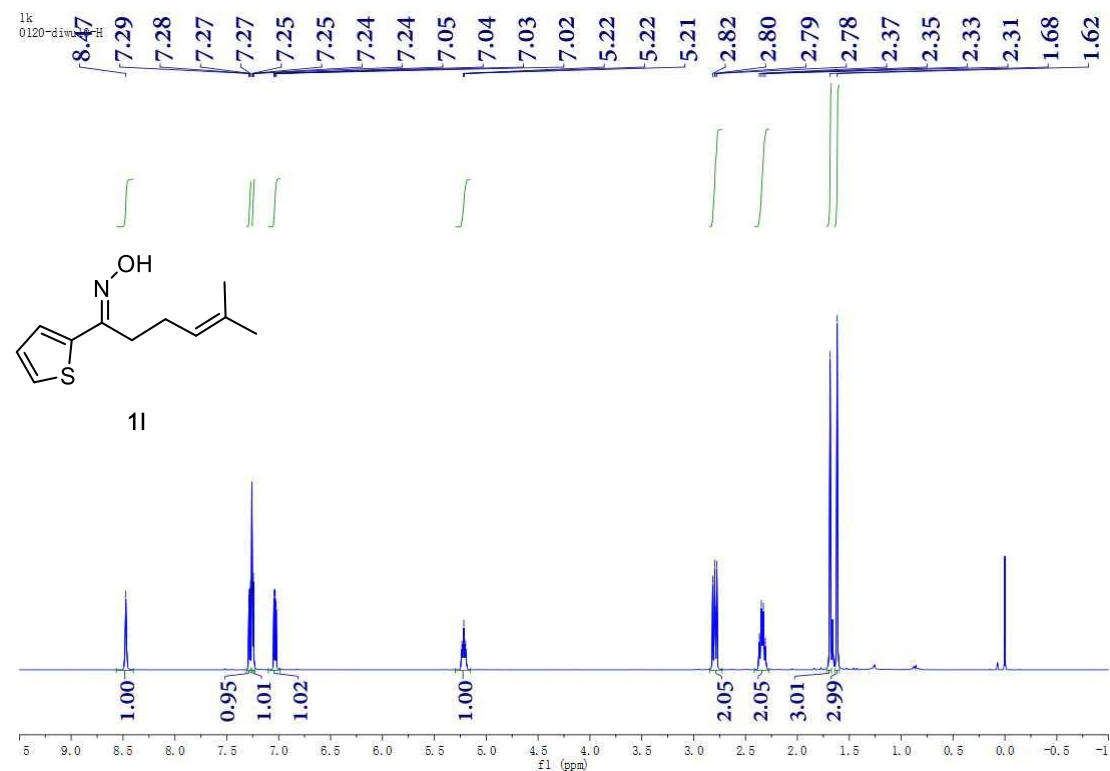

### $^{13}\text{C}$ NMR Spectrum of **1l** (100 MHz; $\text{CDCl}_3$ )

1k  
0120-diwu10-C

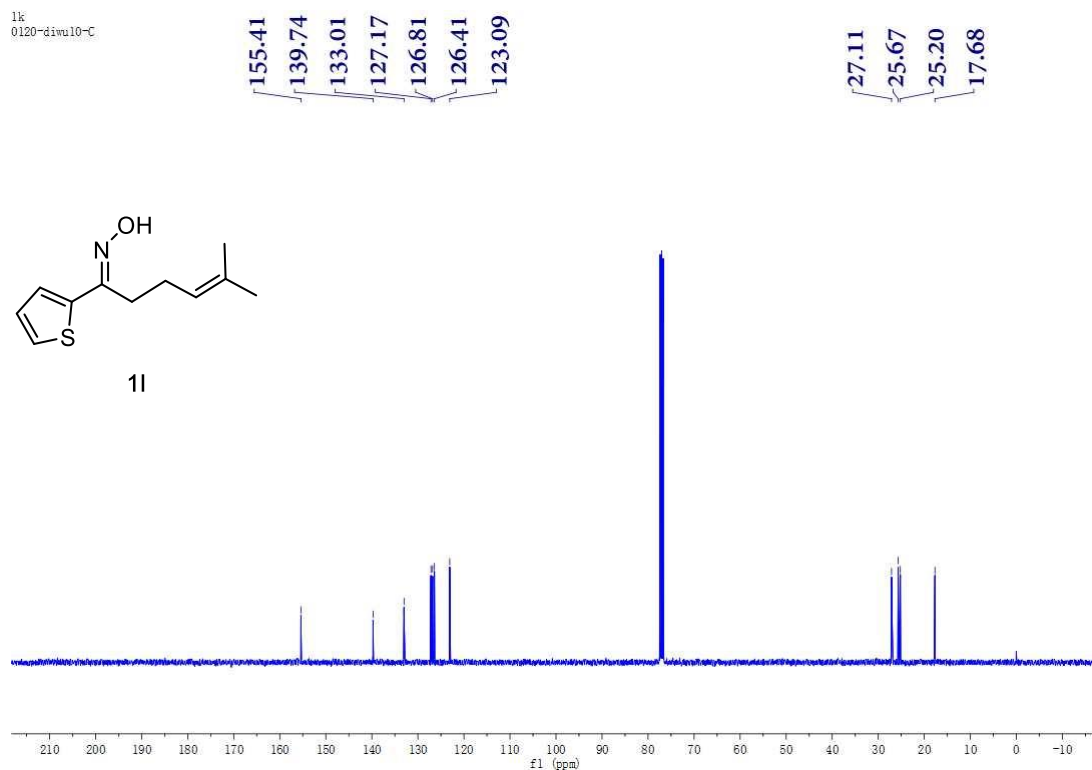

### $^1\text{H}$ NMR Spectrum of **1m** (400 MHz; $\text{CDCl}_3$ )

3-底物  
3-DIWU-H

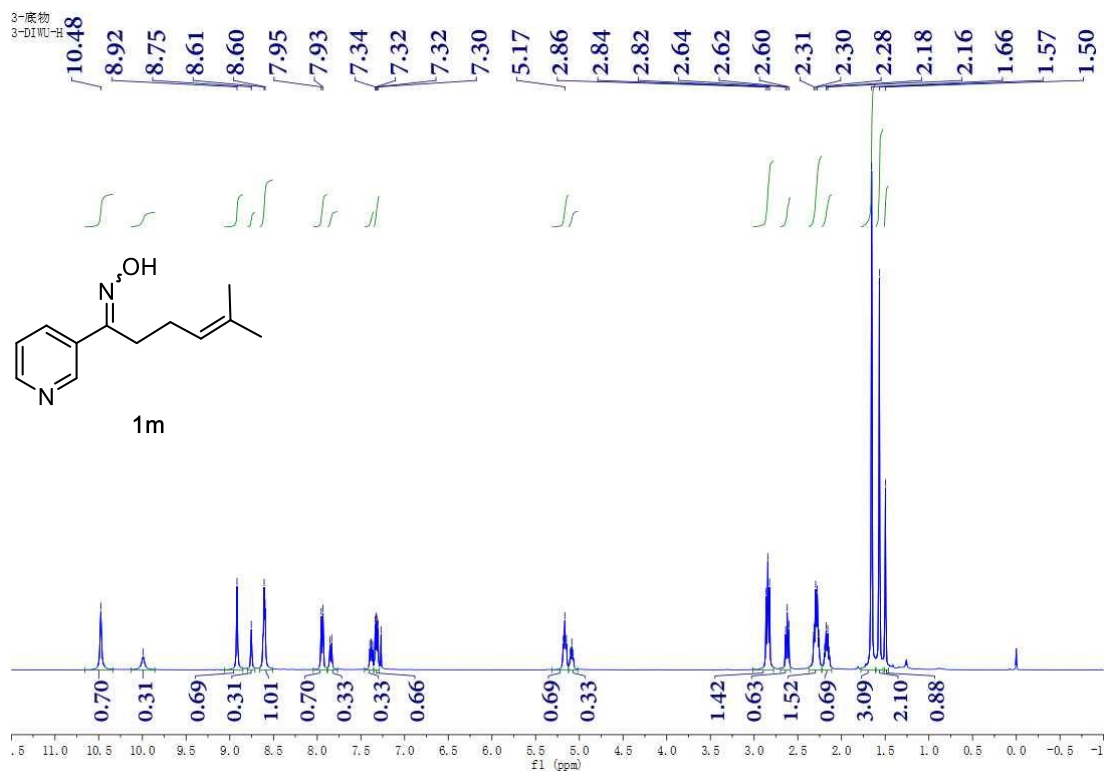

### $^{13}\text{C}$ NMR Spectrum of **1m** (100 MHz; $\text{CDCl}_3$ )

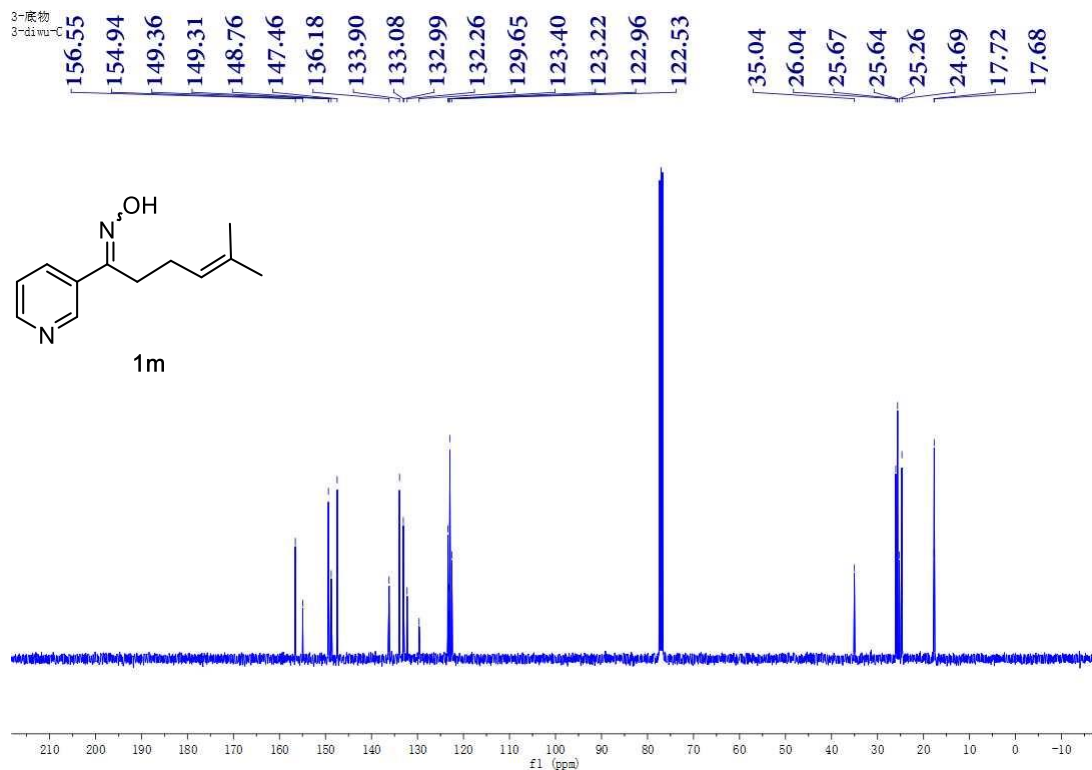

### $^1\text{H}$ NMR Spectrum of **1n** (400 MHz; $\text{CDCl}_3$ )

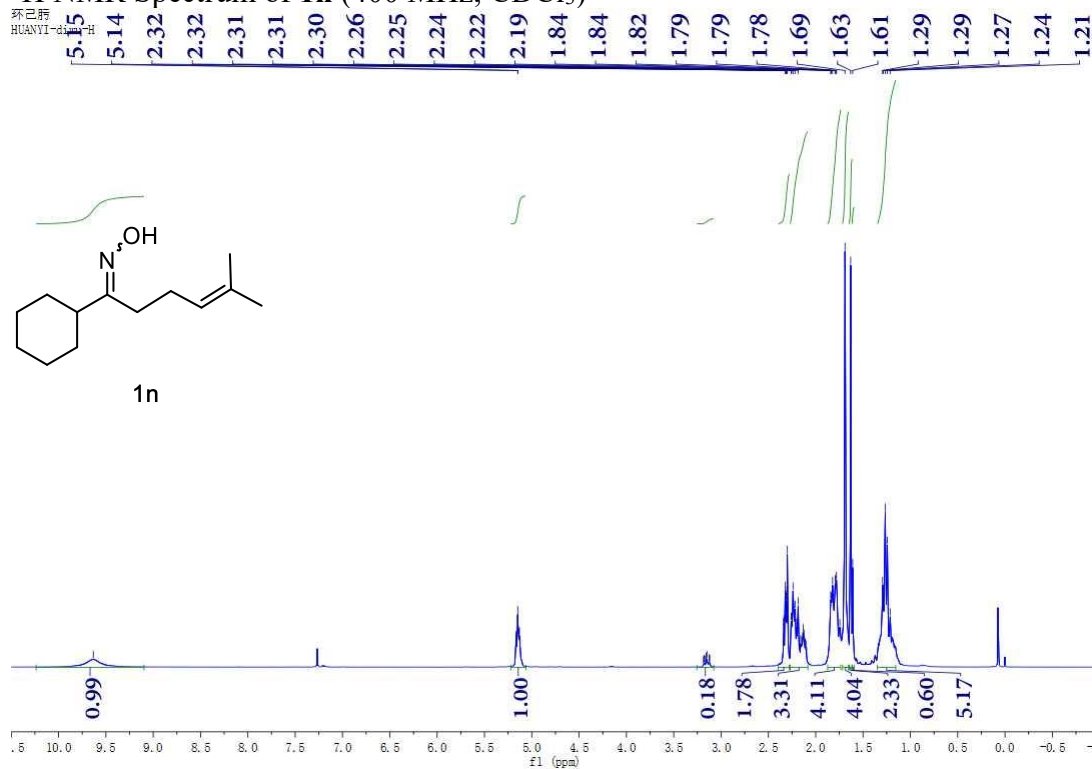



### $^{13}\text{C}$ NMR Spectrum of **1n** (100 MHz; $\text{CDCl}_3$ )

环己醇  
huanjiwo-C

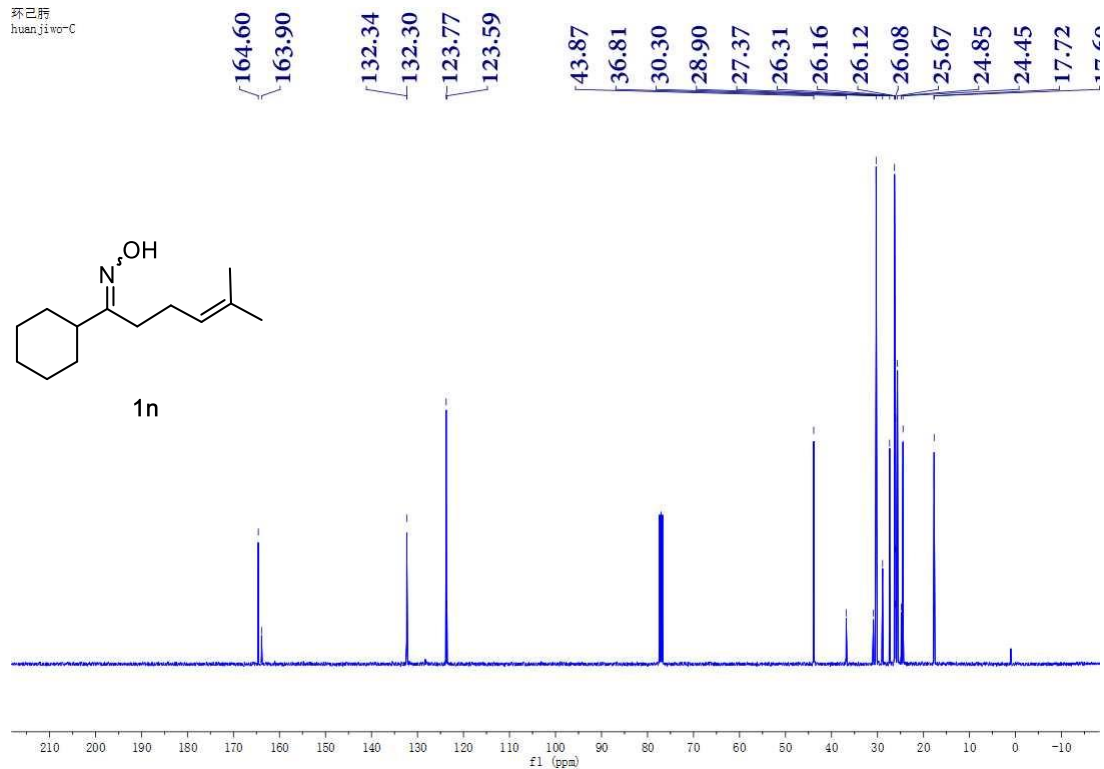

### $^1\text{H}$ NMR Spectrum of **1o** (400 MHz; $\text{CDCl}_3$ )

2-底物  
2-diwu-H

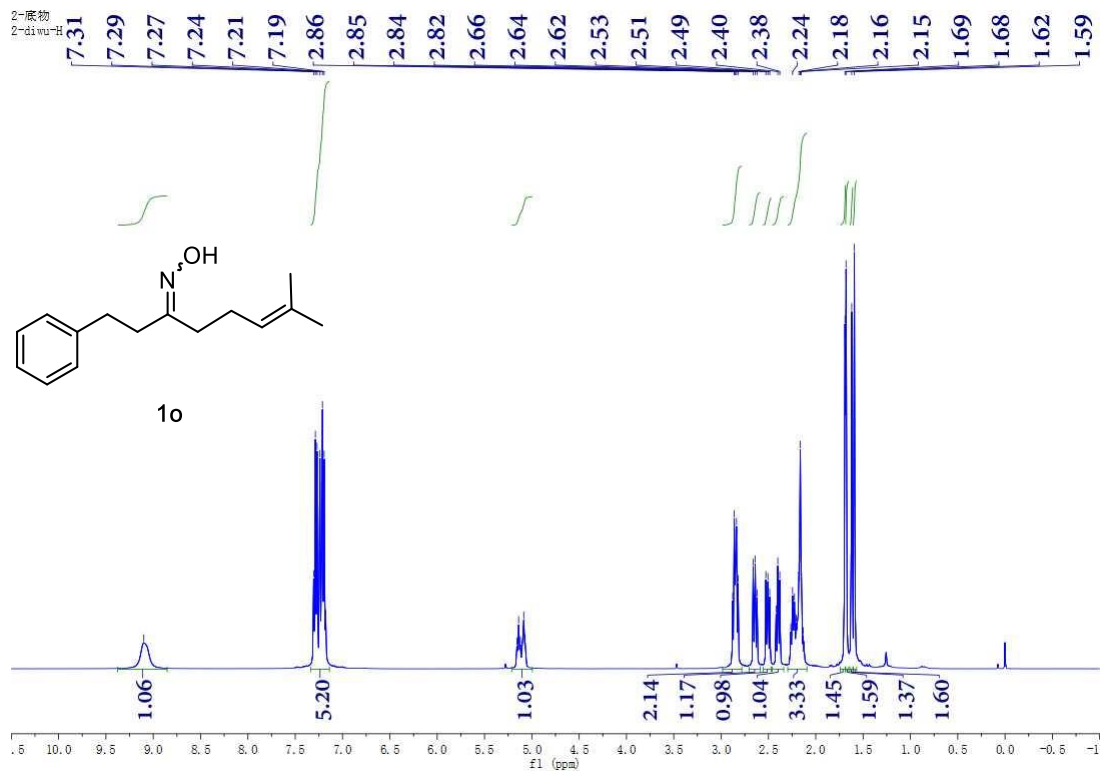

### $^{13}\text{C}$ NMR Spectrum of **1o** (100 MHz; $\text{CDCl}_3$ )

2-底物  
2-diwi-C

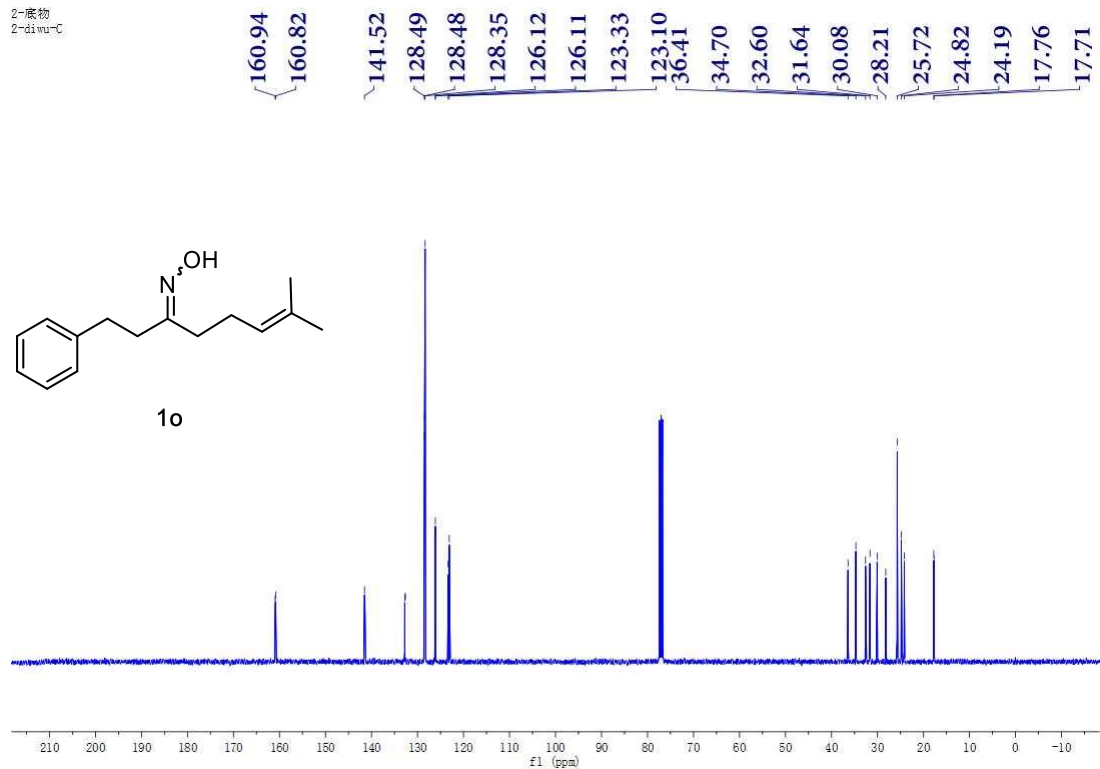

### $^1\text{H}$ NMR Spectrum of **1p** (400 MHz; $\text{CDCl}_3$ )

底物  
bingben

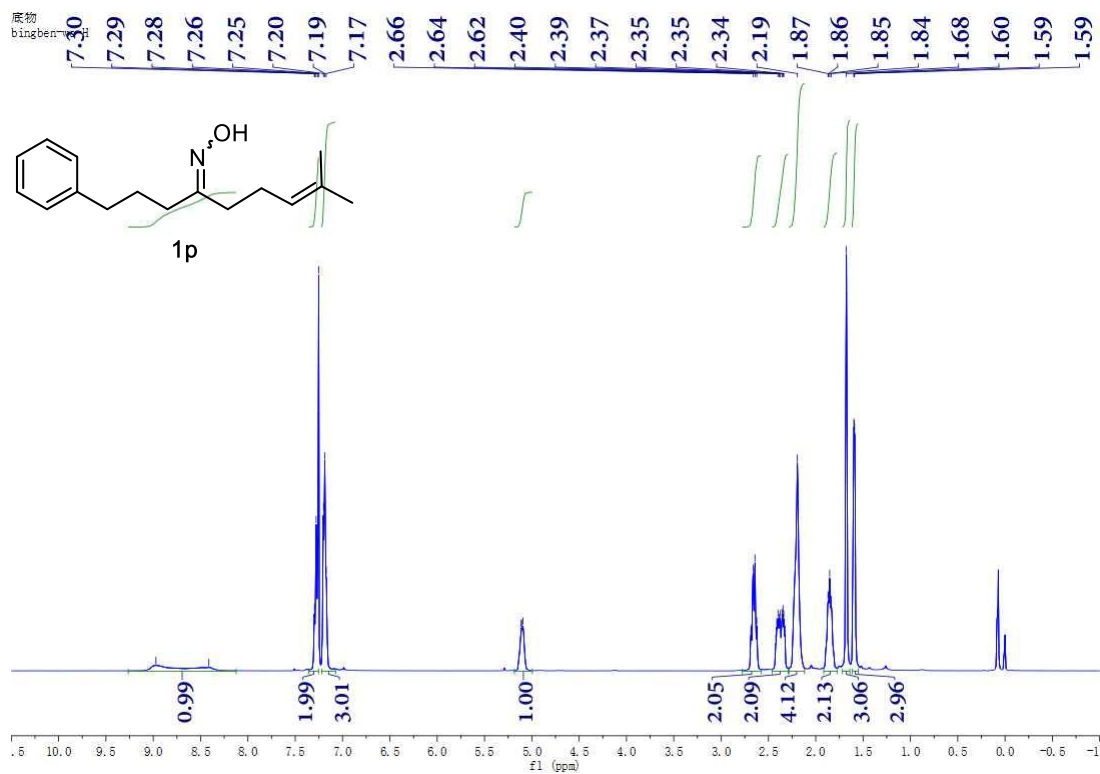

### $^{13}\text{C}$ NMR Spectrum of **1p** (100 MHz; $\text{CDCl}_3$ )

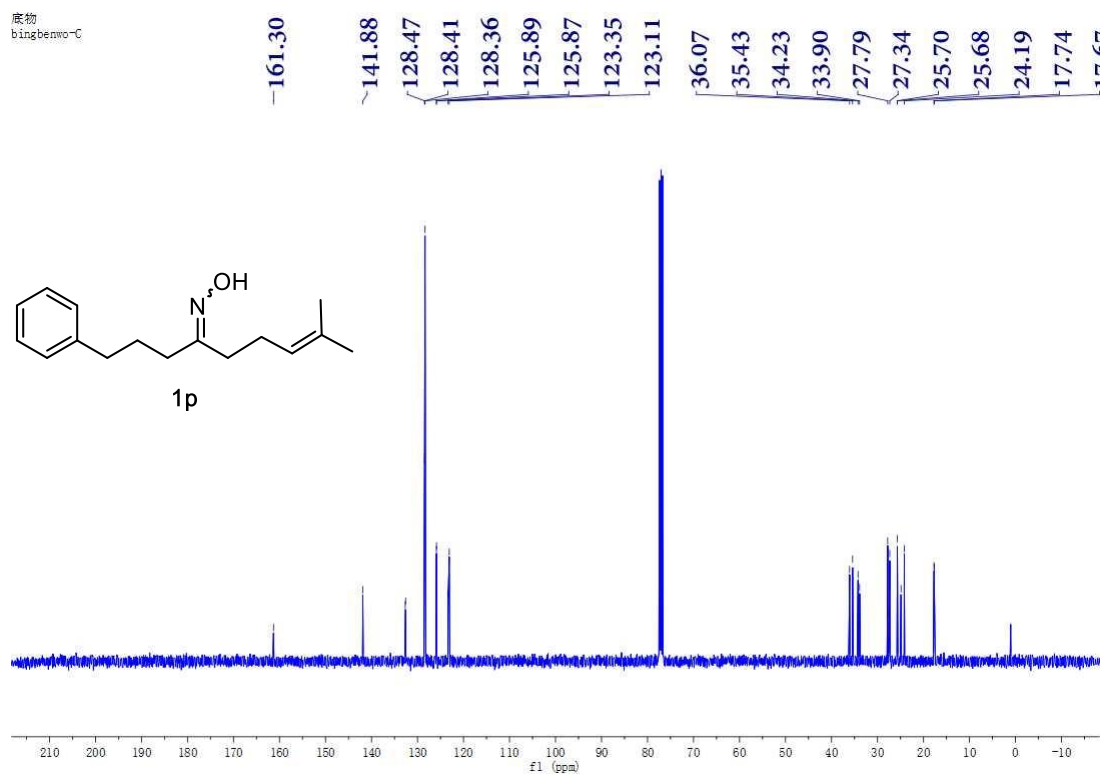

### $^1\text{H}$ NMR Spectrum of **1r** (400 MHz; $\text{CDCl}_3$ )

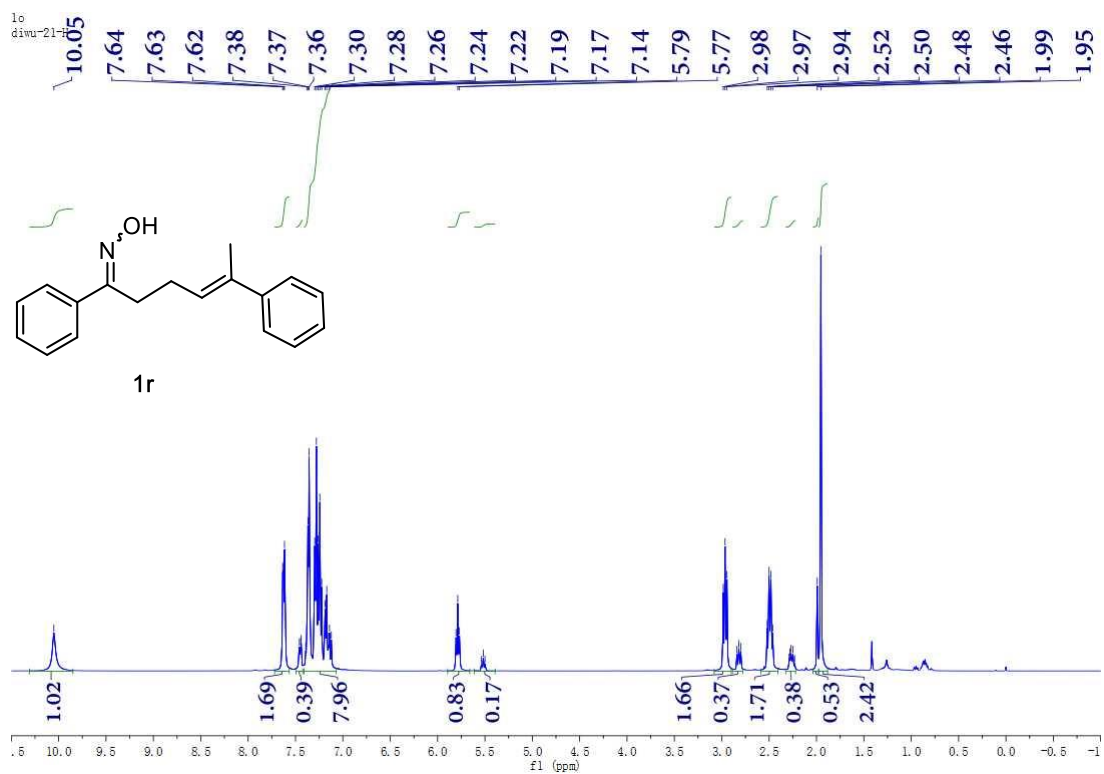

<sup>13</sup>C NMR Spectrum of **1r** (100 MHz; CDCl<sub>3</sub>)

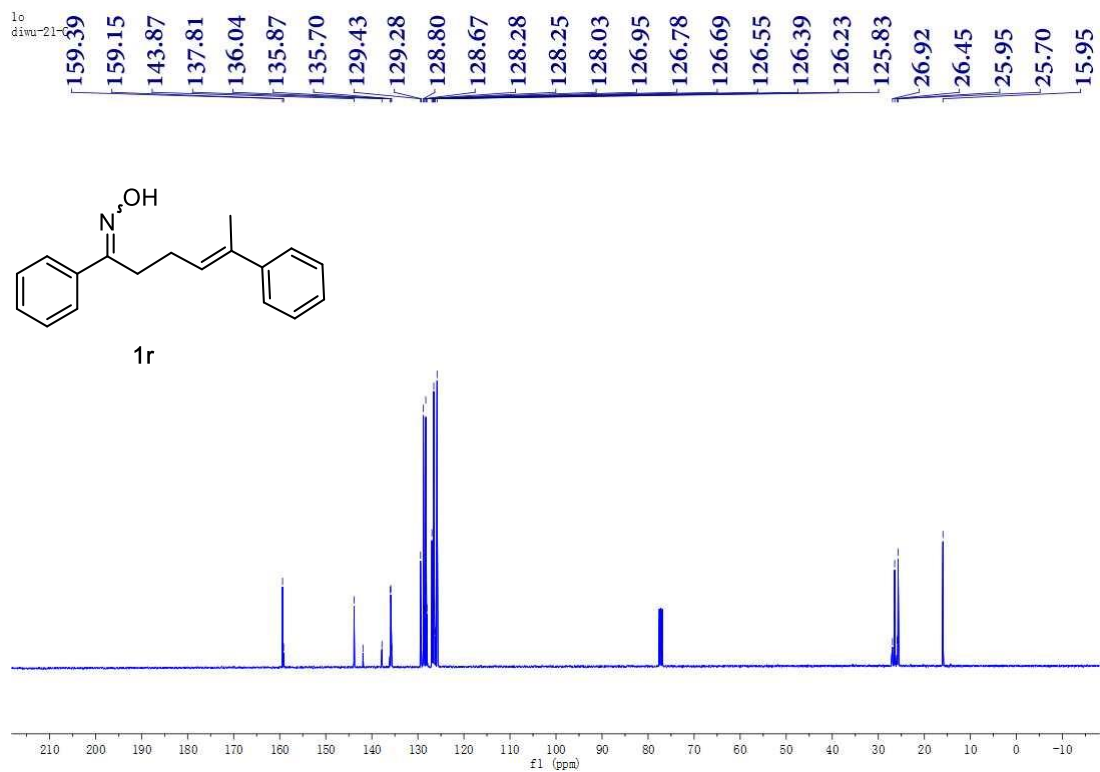

<sup>1</sup>H NMR Spectrum of **1u** (400 MHz; CDCl<sub>3</sub>)

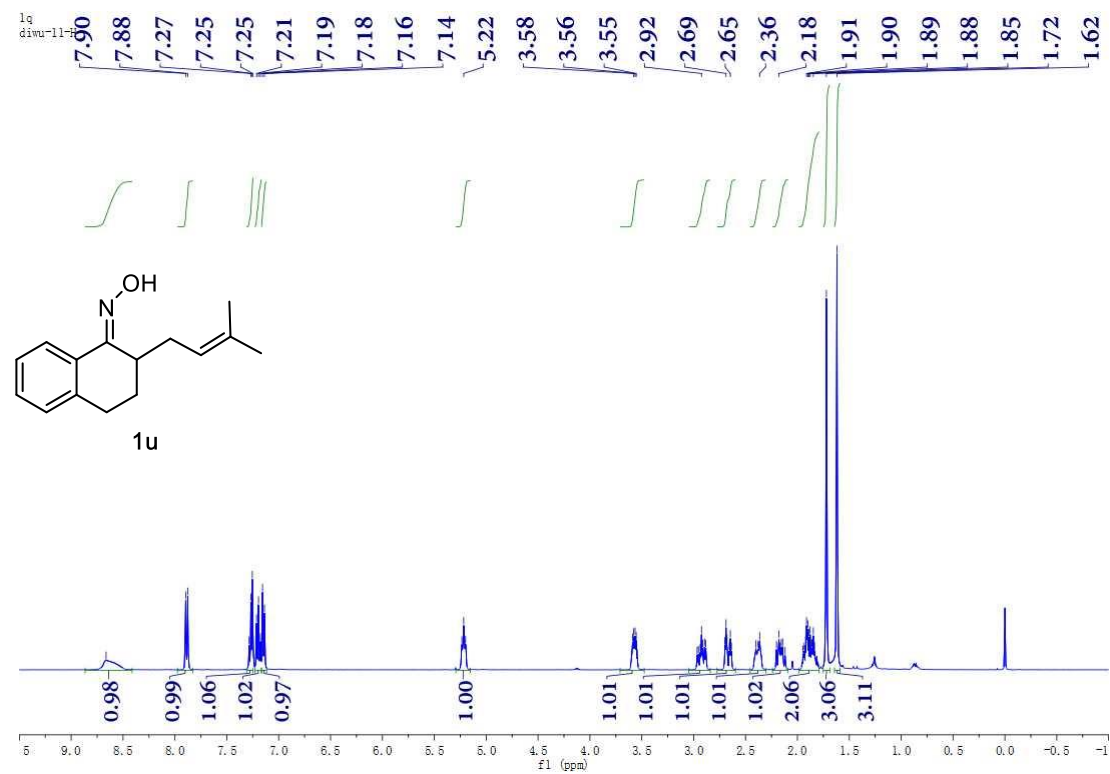

### $^{13}\text{C}$ NMR Spectrum of **1u** (100 MHz; $\text{CDCl}_3$ )

1u  
givu-11-C

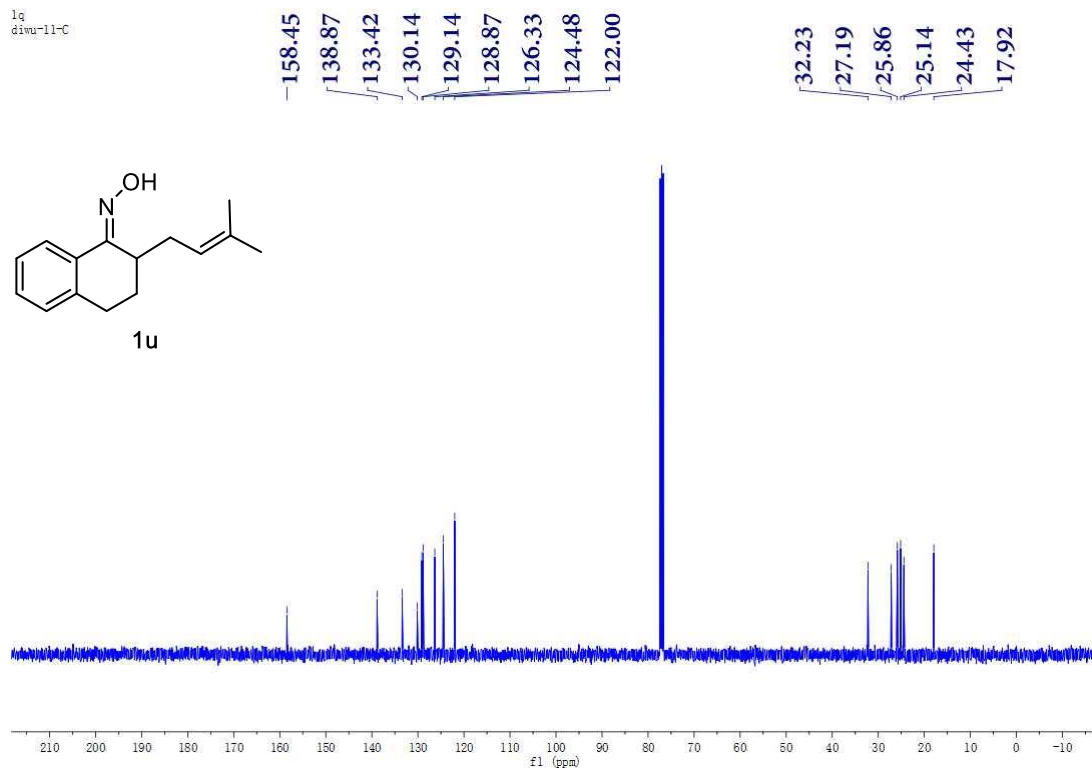

### $^1\text{H}$ NMR Spectrum of **1w** (400 MHz; $\text{CDCl}_3$ )

20221209  
radical clock-div

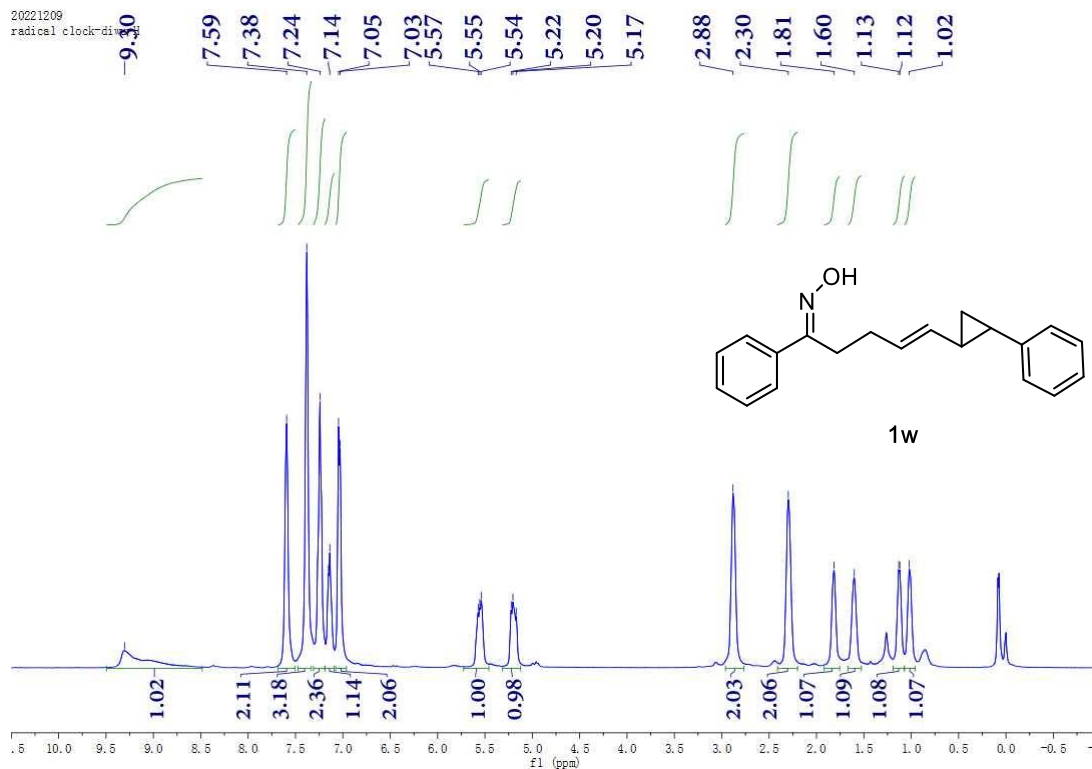

<sup>13</sup>C NMR Spectrum of **1w** (100 MHz; CDCl<sub>3</sub>)

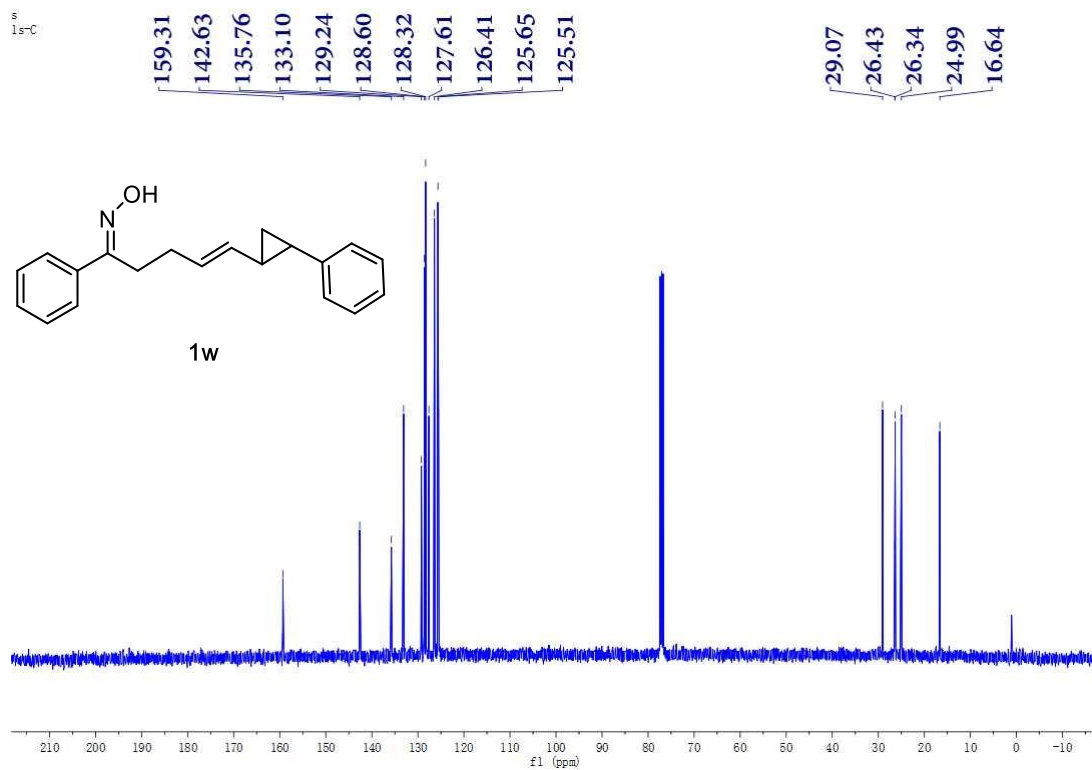

<sup>1</sup>H NMR Spectrum of **1x** (400 MHz; CDCl<sub>3</sub>)

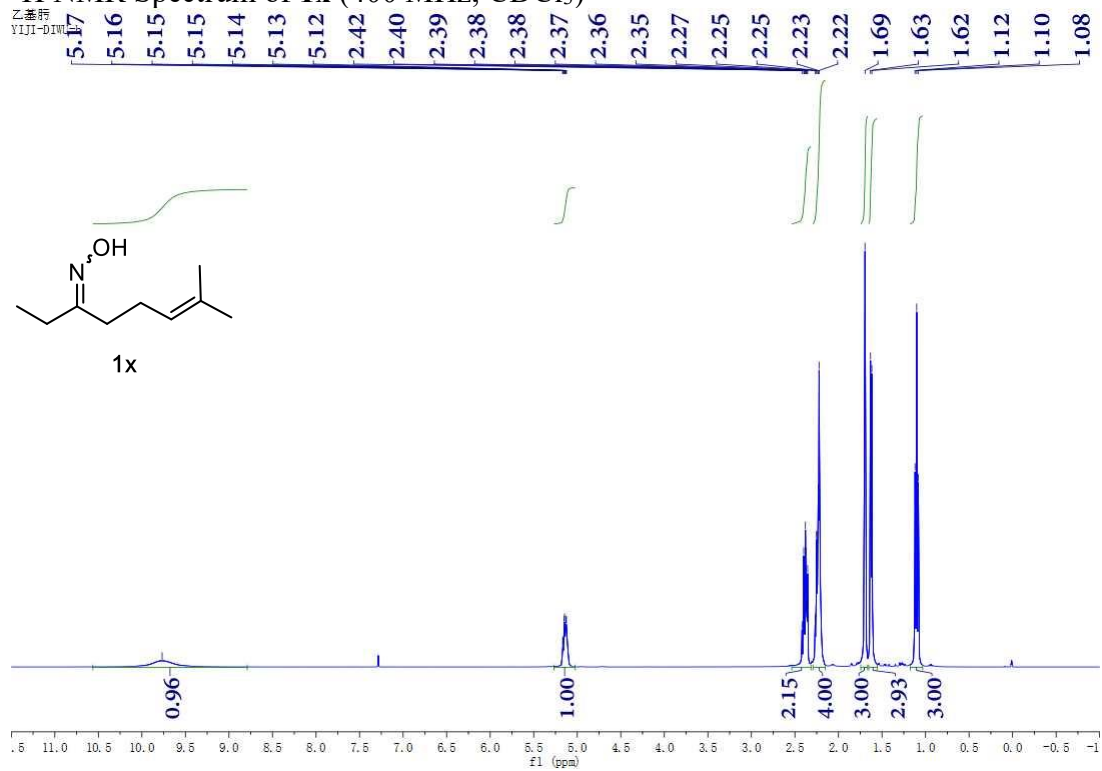

### $^{13}\text{C}$ NMR Spectrum of **1x** (100 MHz; $\text{CDCl}_3$ )

乙基衍  
YIJI-DIWU-C

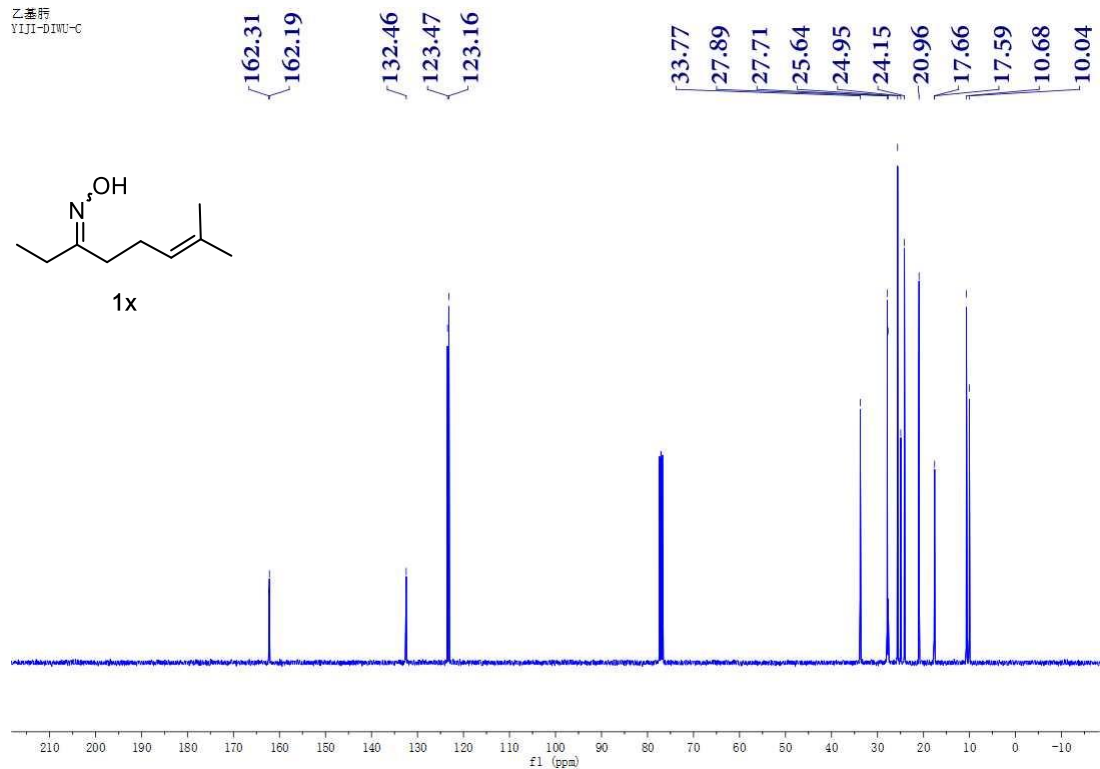

### $^1\text{H}$ NMR Spectrum of **1y** (400 MHz; $\text{CDCl}_3$ )

异丙基  
yibingwo

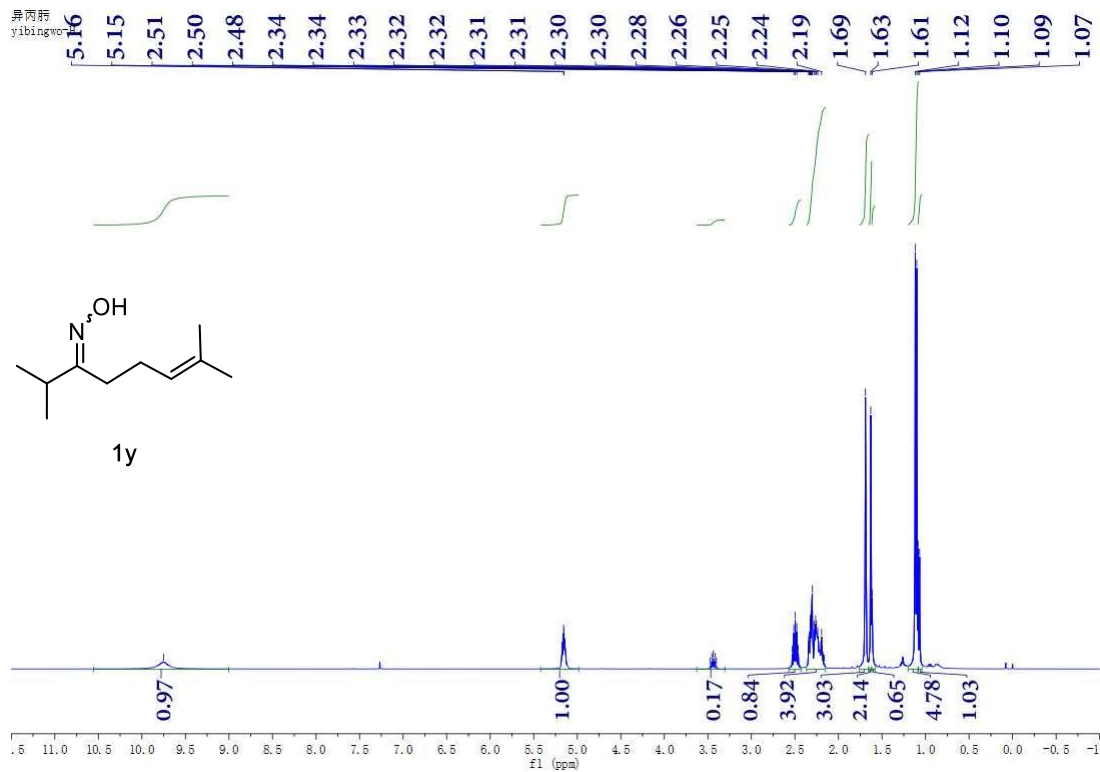

### $^{13}\text{C}$ NMR Spectrum of **1y** (100 MHz; $\text{CDCl}_3$ )

异丙醇  
yibingwo-C

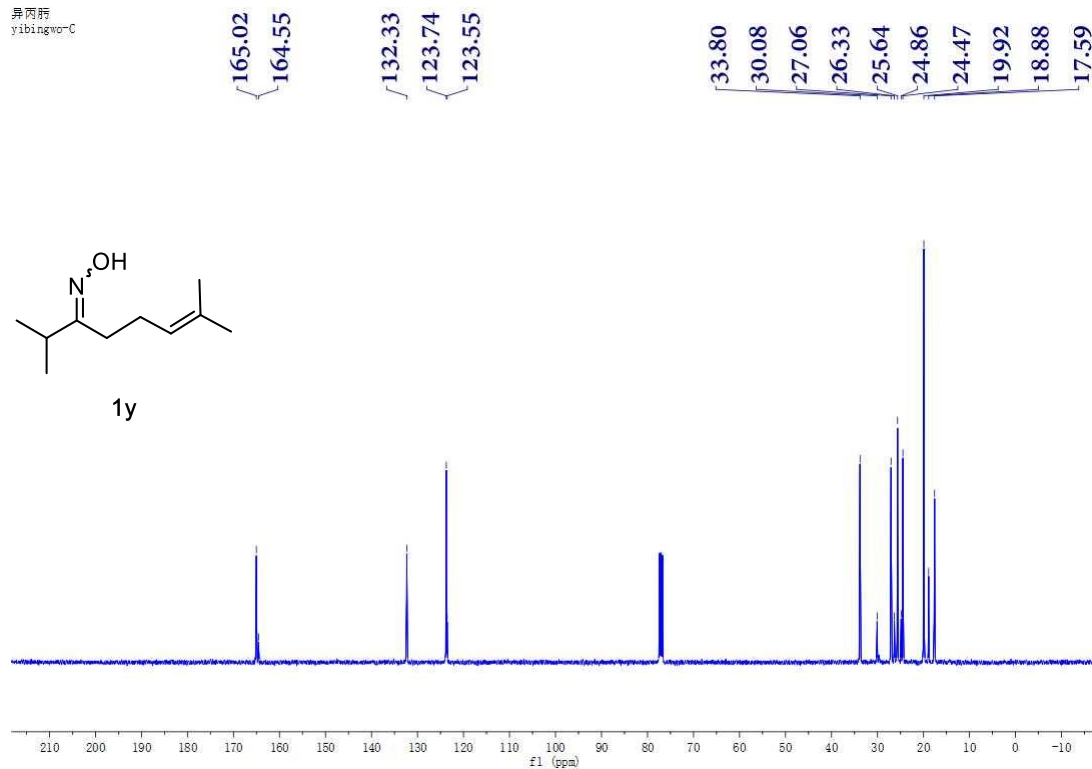

### $^1\text{H}$ NMR Spectrum of **1z** (400 MHz; $\text{CDCl}_3$ )

1-底物

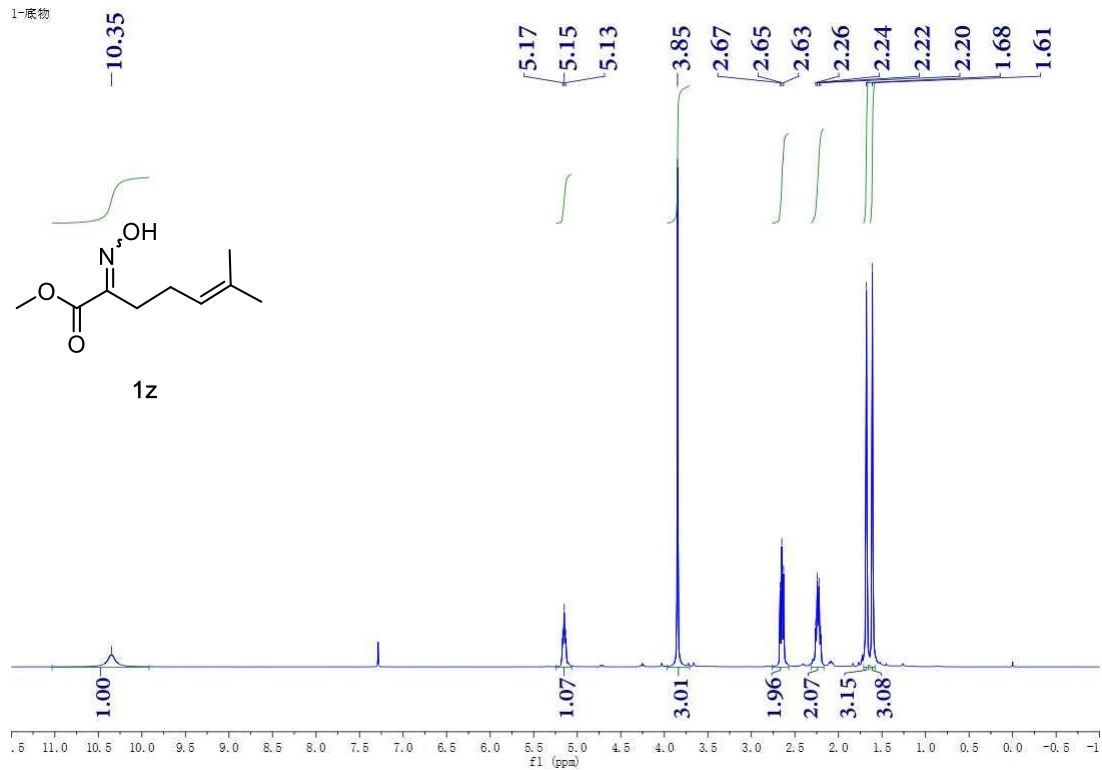



### $^{13}\text{C}$ NMR Spectrum of **1z** (100 MHz; $\text{CDCl}_3$ )

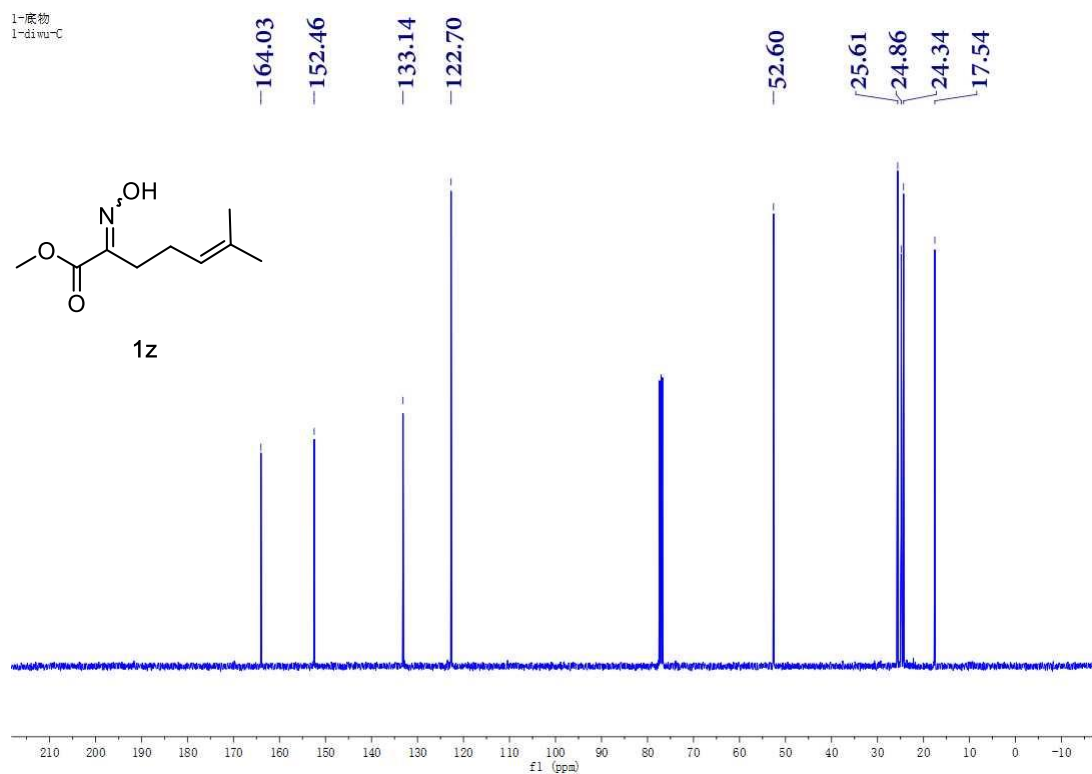

### $^1\text{H}$ NMR Spectrum of **2a** (400 MHz; $\text{CDCl}_3$ )

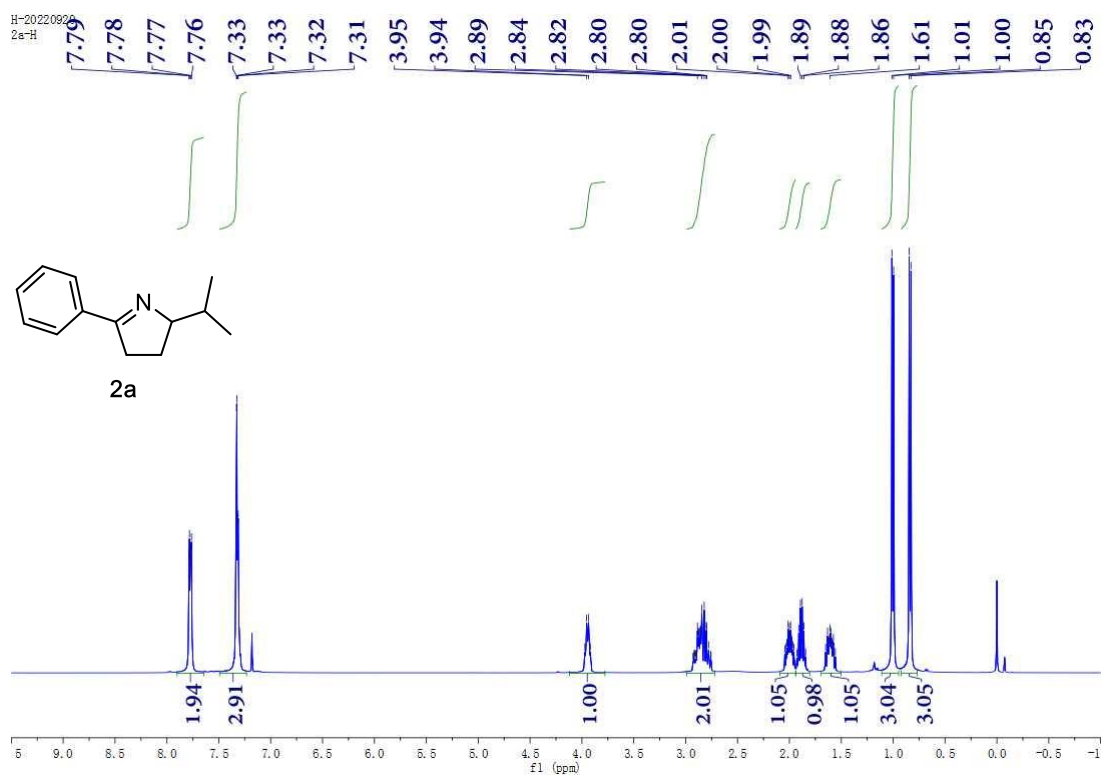

### <sup>13</sup>C NMR Spectrum of **2a** (100 MHz; CDCl<sub>3</sub>)

Dec27-2020  
hwc-91a-c

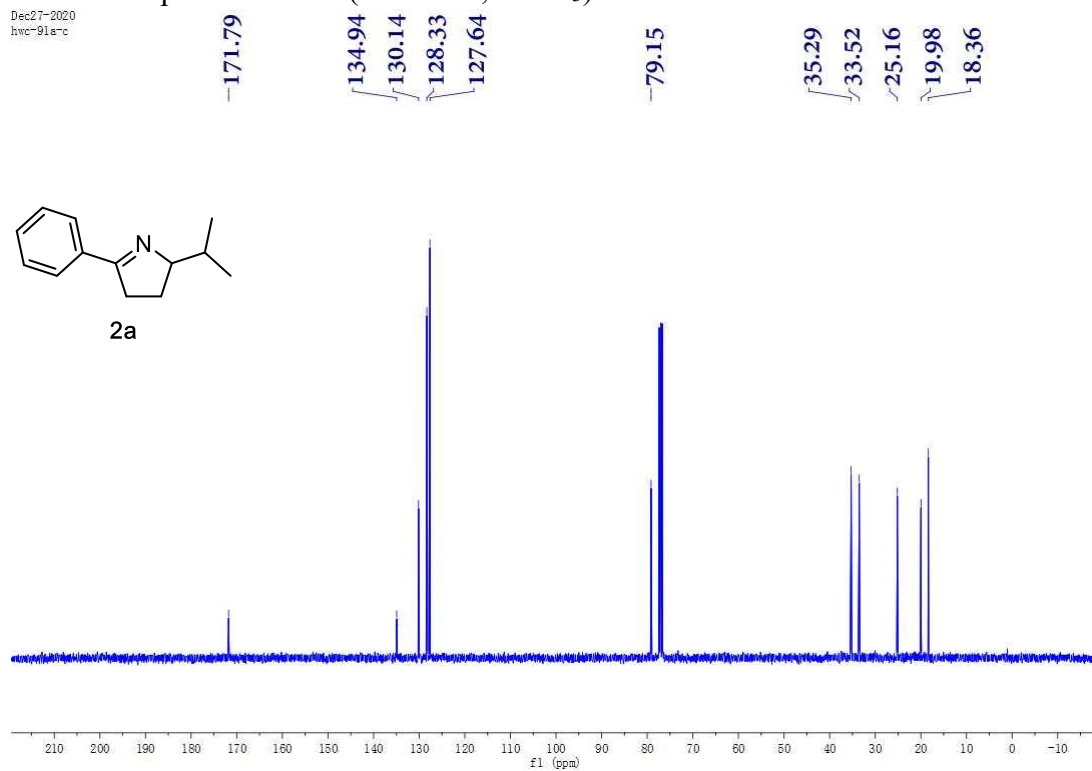

### <sup>1</sup>H NMR Spectrum of **2b** (400 MHz; CDCl<sub>3</sub>)

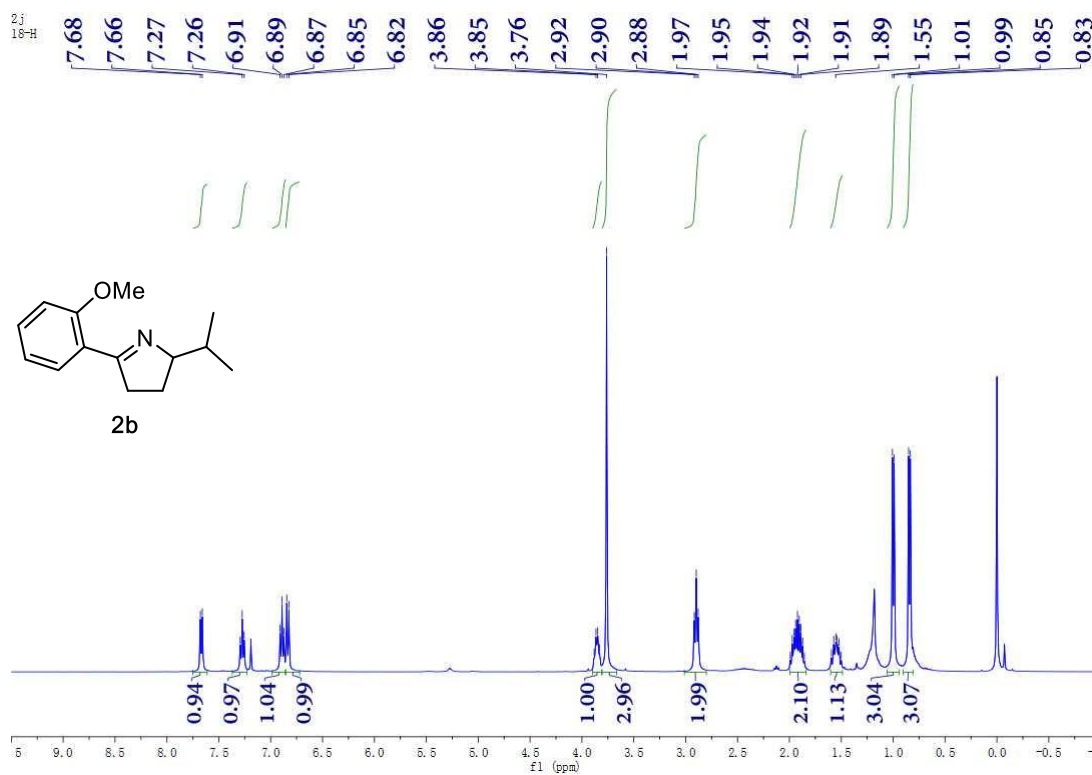

<sup>13</sup>C NMR Spectrum of **2b** (100 MHz; CDCl<sub>3</sub>)

2j  
chanwu18-C

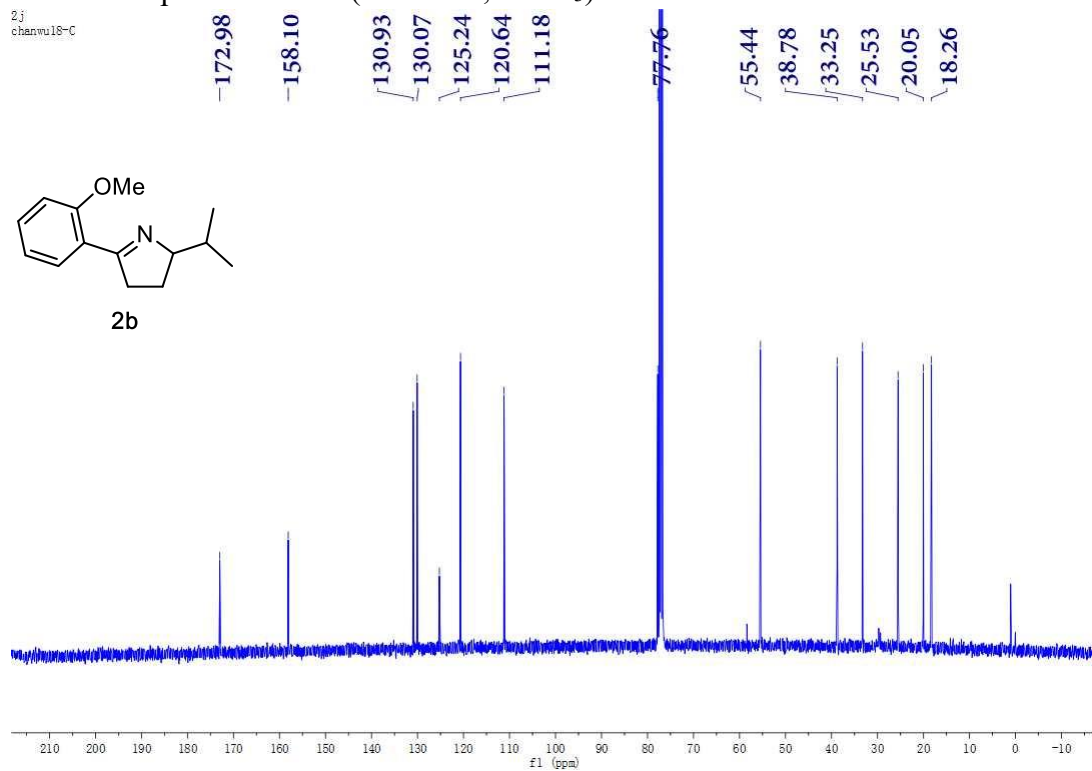

<sup>1</sup>H NMR Spectrum of **2c** (400 MHz; CDCl<sub>3</sub>)

2i  
CHANWU-17

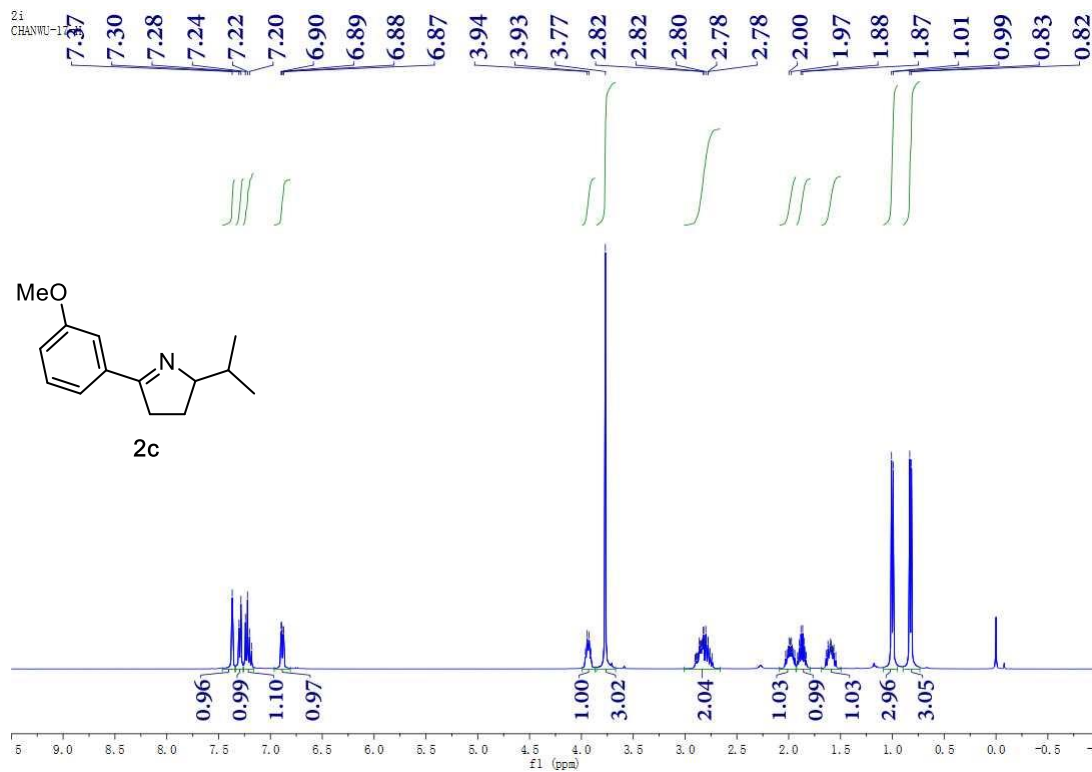

### $^{13}\text{C}$ NMR Spectrum of **2c** (100 MHz; $\text{CDCl}_3$ )

2i  
CHANWU-17-C

-171.77  
-159.59  
136.28  
129.34  
120.40  
116.50  
112.14  
-79.10  
-55.38  
35.43  
33.51  
25.12  
20.06  
18.32

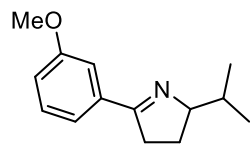

**2c**

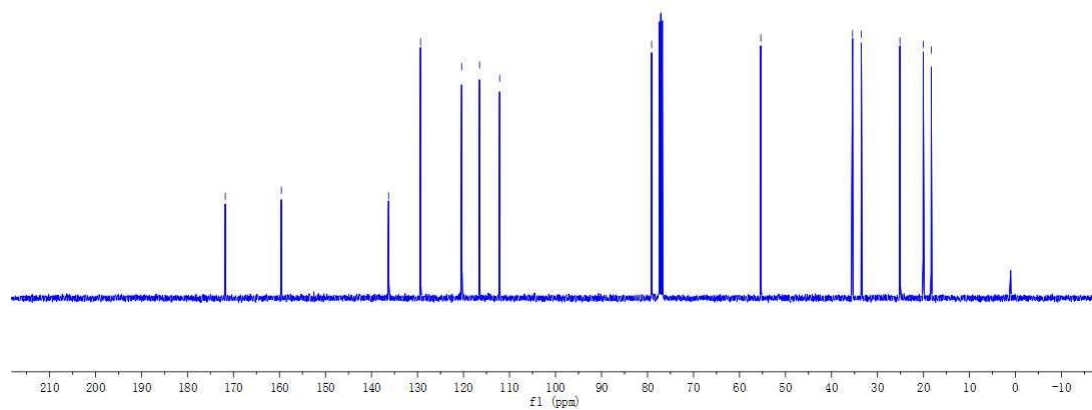

### $^1\text{H}$ NMR Spectrum of **2d** (400 MHz; $\text{CDCl}_3$ )

2h  
20210121

7.80  
7.78  
6.91  
6.89  
3.99  
3.97  
3.83  
2.92  
2.91  
2.88  
2.86  
2.83  
2.06  
2.04  
2.04  
1.96  
1.94  
1.93  
1.91  
1.68  
1.65  
1.63  
1.08  
1.06  
0.90  
0.89

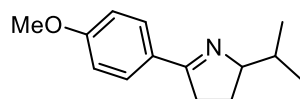

**2d**

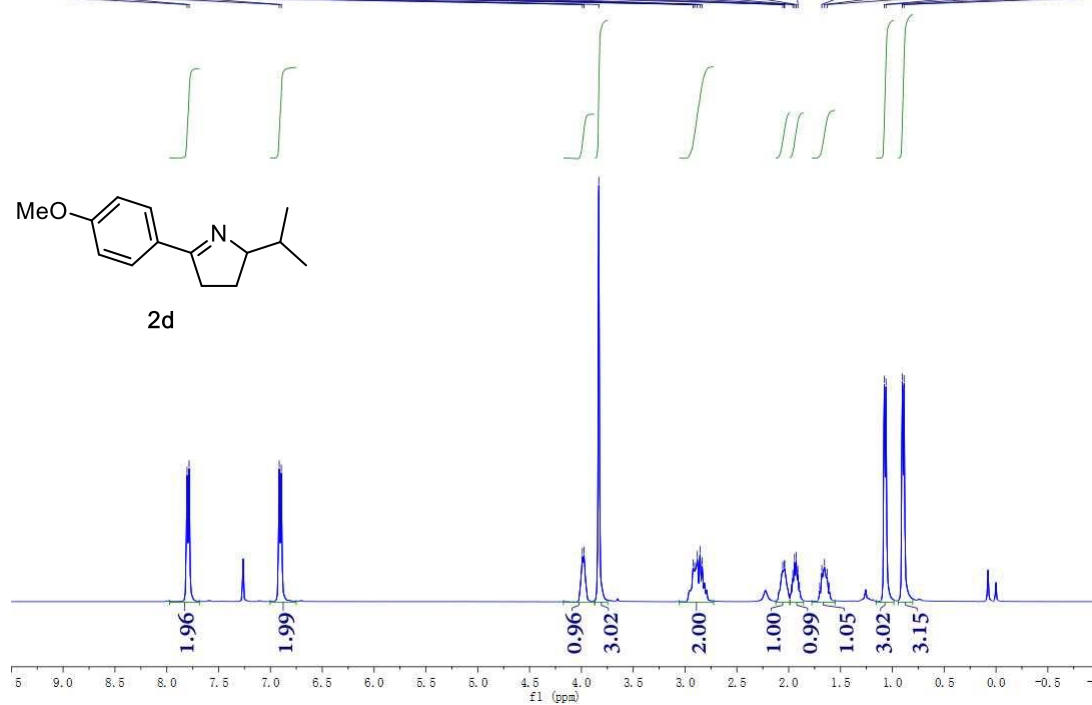

### $^{13}\text{C}$ NMR Spectrum of **2d** (100 MHz; $\text{CDCl}_3$ )

2h  
20210121-chaaru6-C

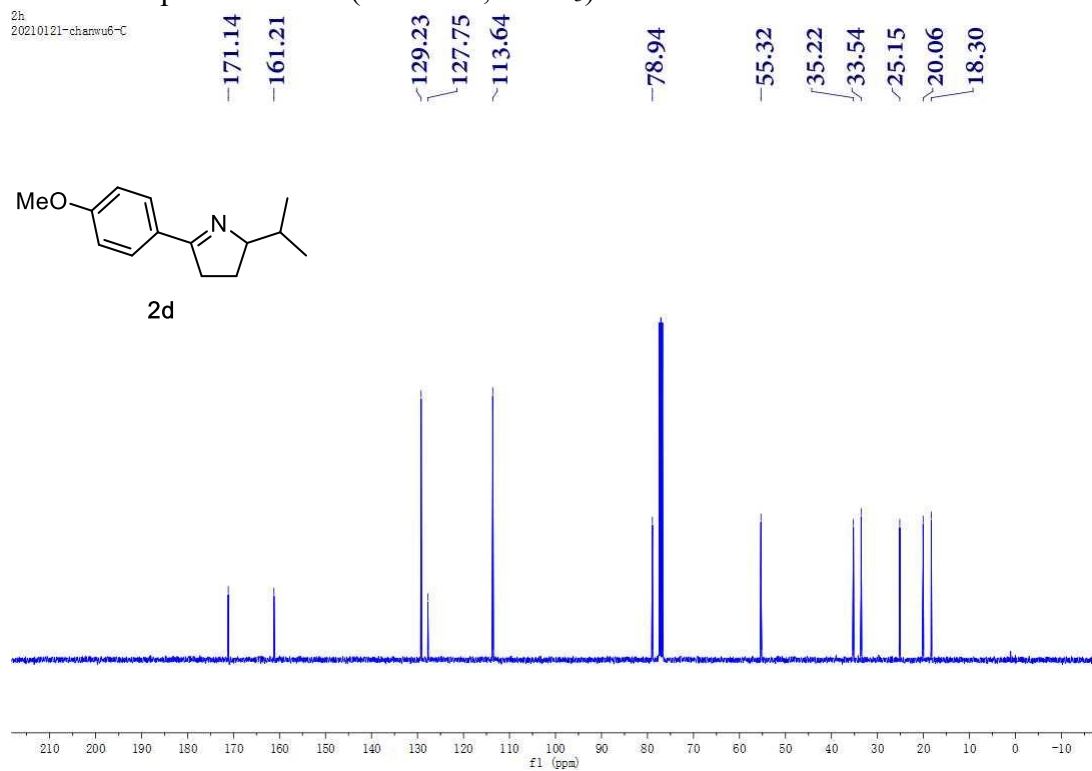

### $^1\text{H}$ NMR Spectrum of **2e** (400 MHz; $\text{CDCl}_3$ )

H-2022090  
2d

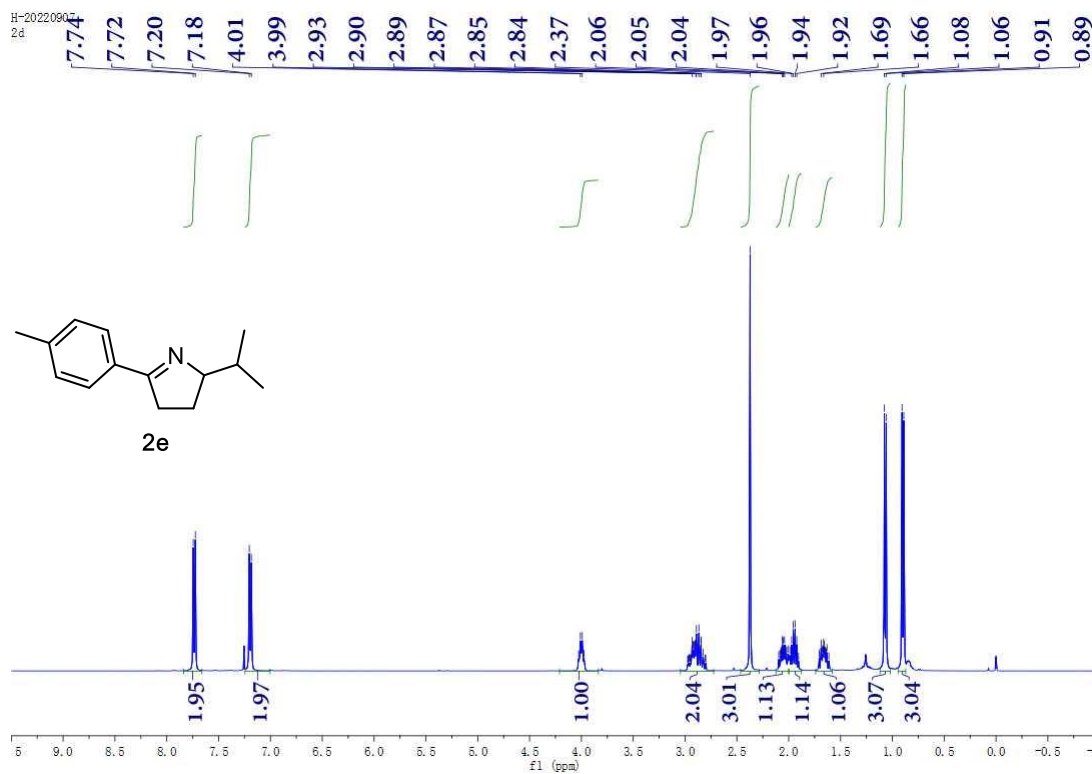

### $^{13}\text{C}$ NMR Spectrum of **2e** (100 MHz; $\text{CDCl}_3$ )

Dec27-2020  
91d-C

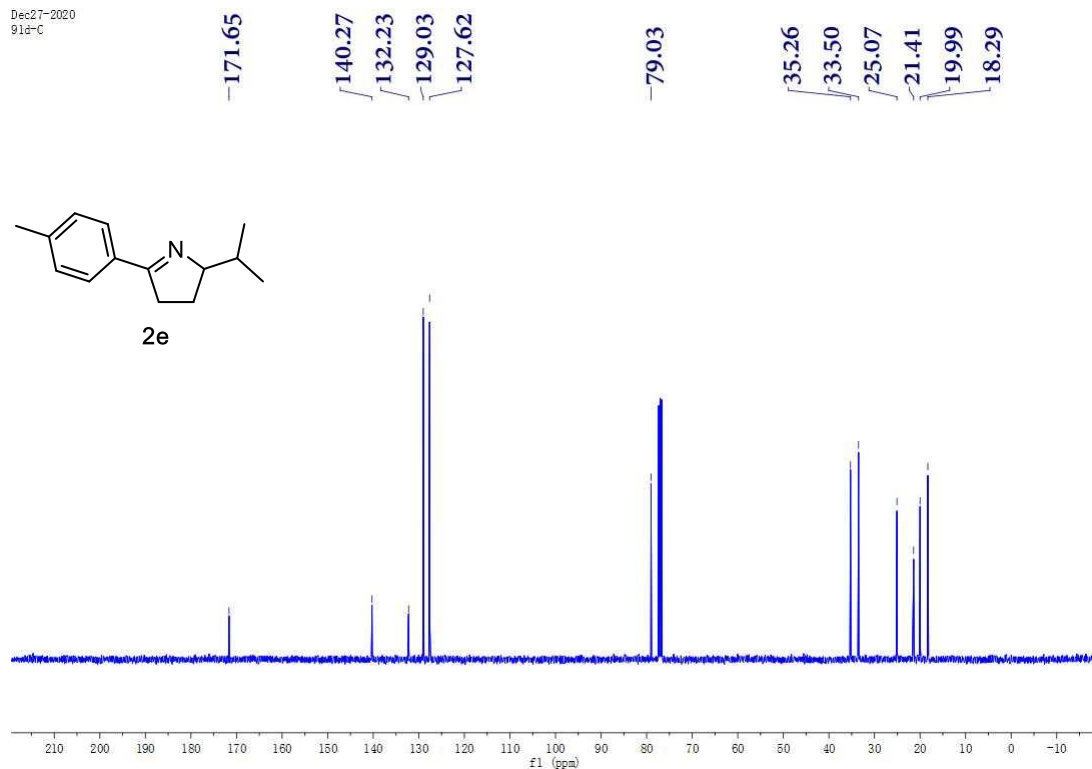

### $^1\text{H}$ NMR Spectrum of **2f** (400 MHz; $\text{CDCl}_3$ )

产物S  
CHANWU-84

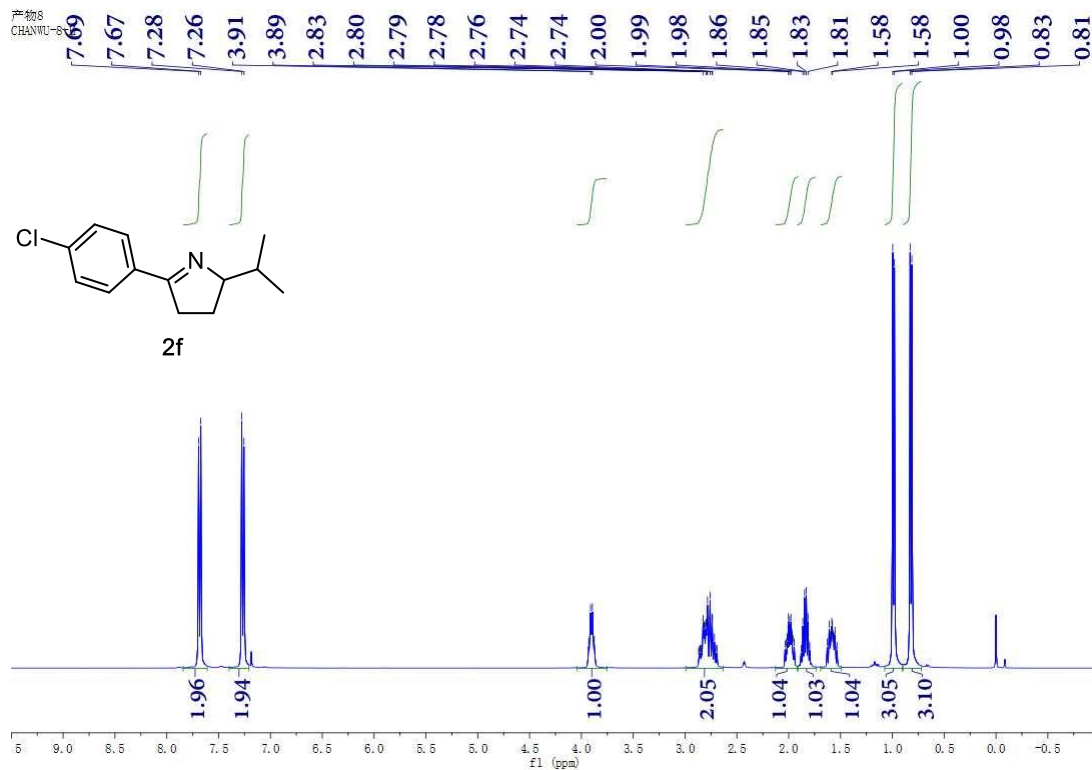

$^{13}\text{C}$  NMR Spectrum of **2f** (100 MHz;  $\text{CDCl}_3$ )

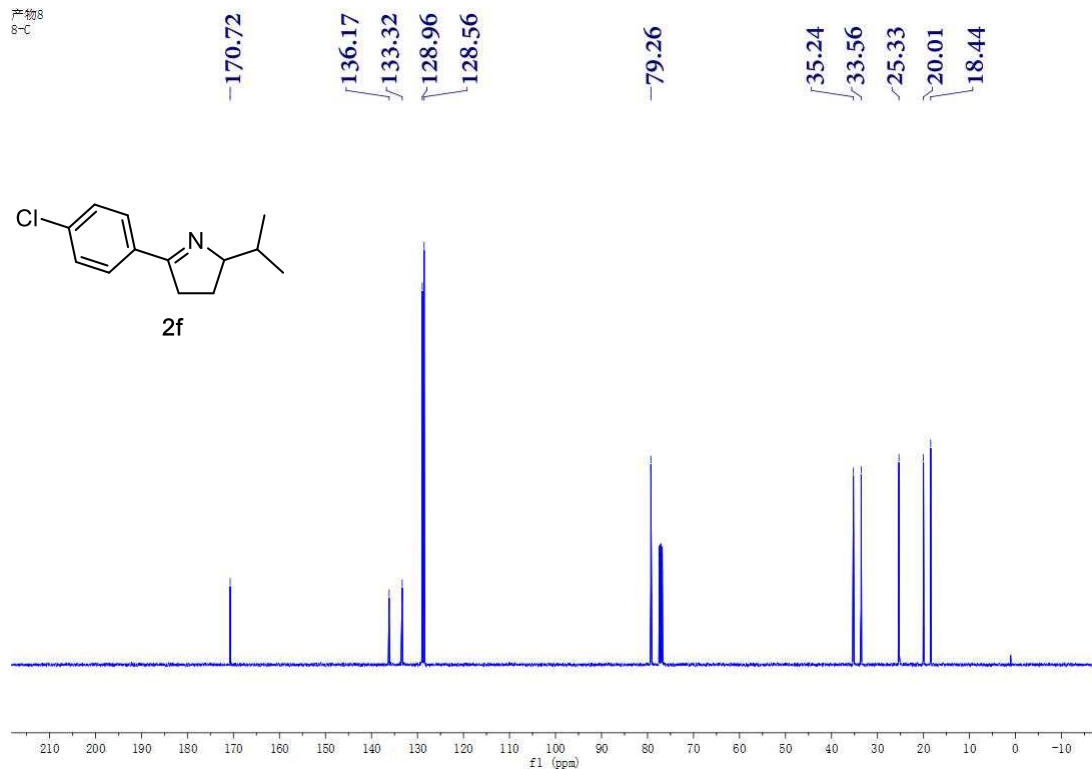

$^1\text{H}$  NMR Spectrum of **2g** (400 MHz;  $\text{CDCl}_3$ )

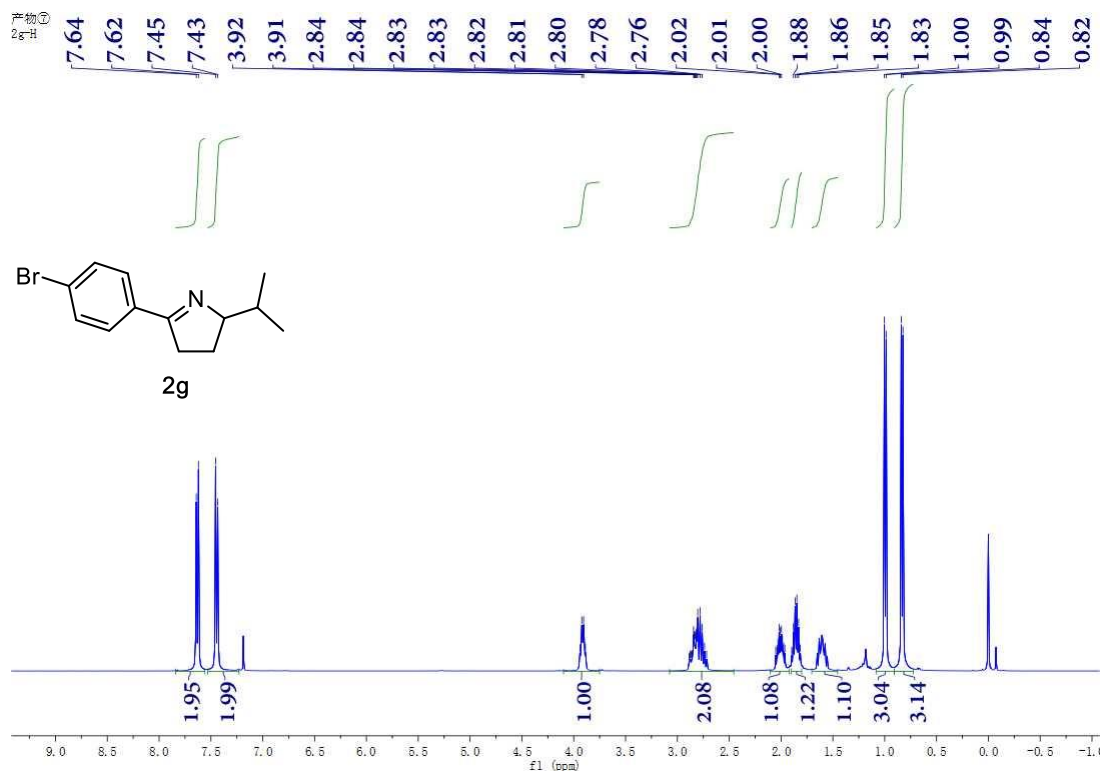

### $^{13}\text{C}$ NMR Spectrum of **2g** (100 MHz; $\text{CDCl}_3$ )

产物7  
20210121-charwu7-C

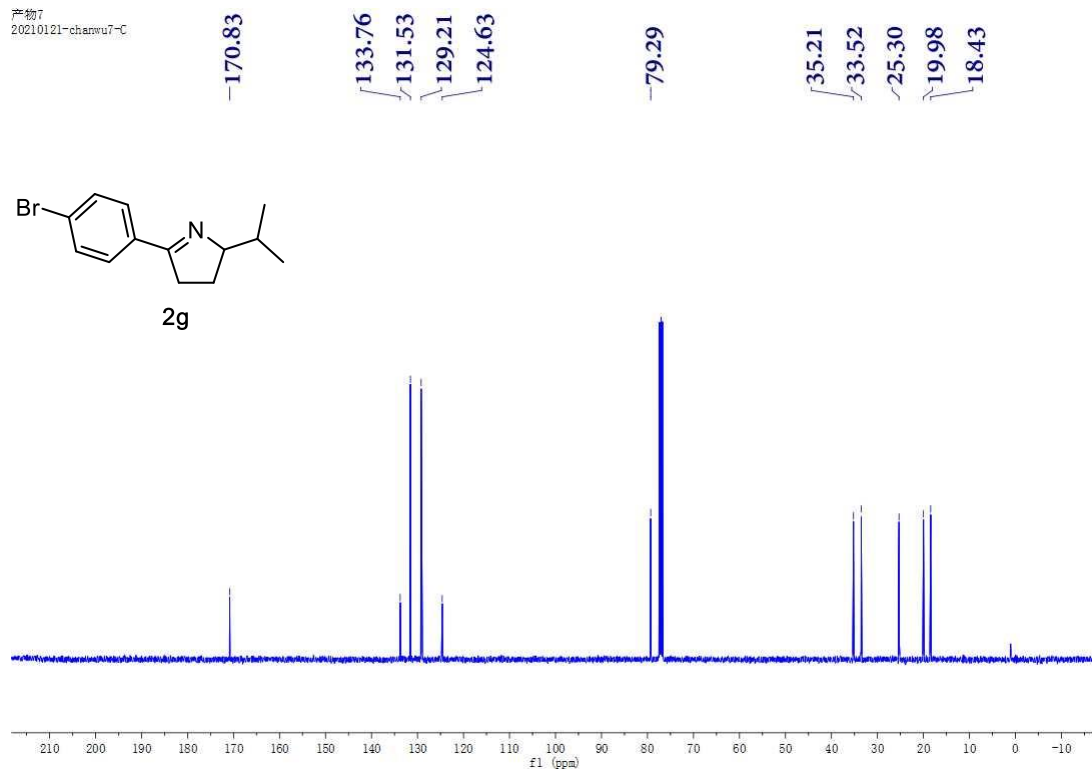

### $^1\text{H}$ NMR Spectrum of **2h** (400 MHz; $\text{CDCl}_3$ )

2e

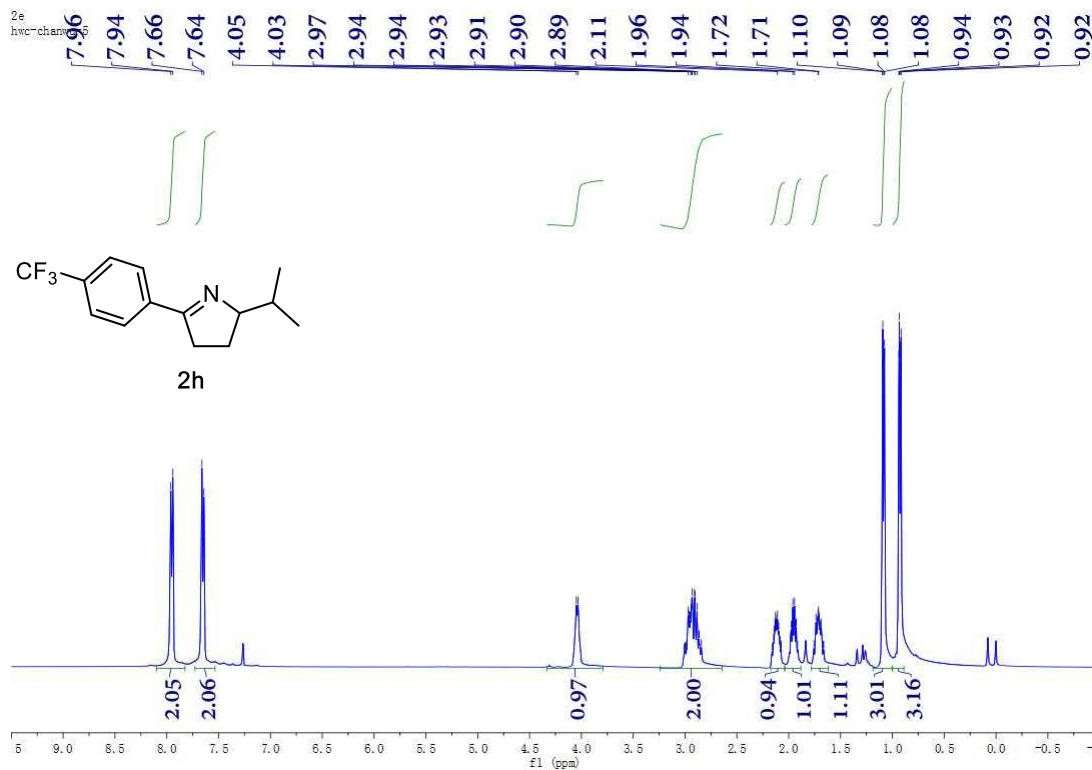



### <sup>13</sup>C NMR Spectrum of **2h** (100 MHz; CDCl<sub>3</sub>)

2e  
chanwu-S-C

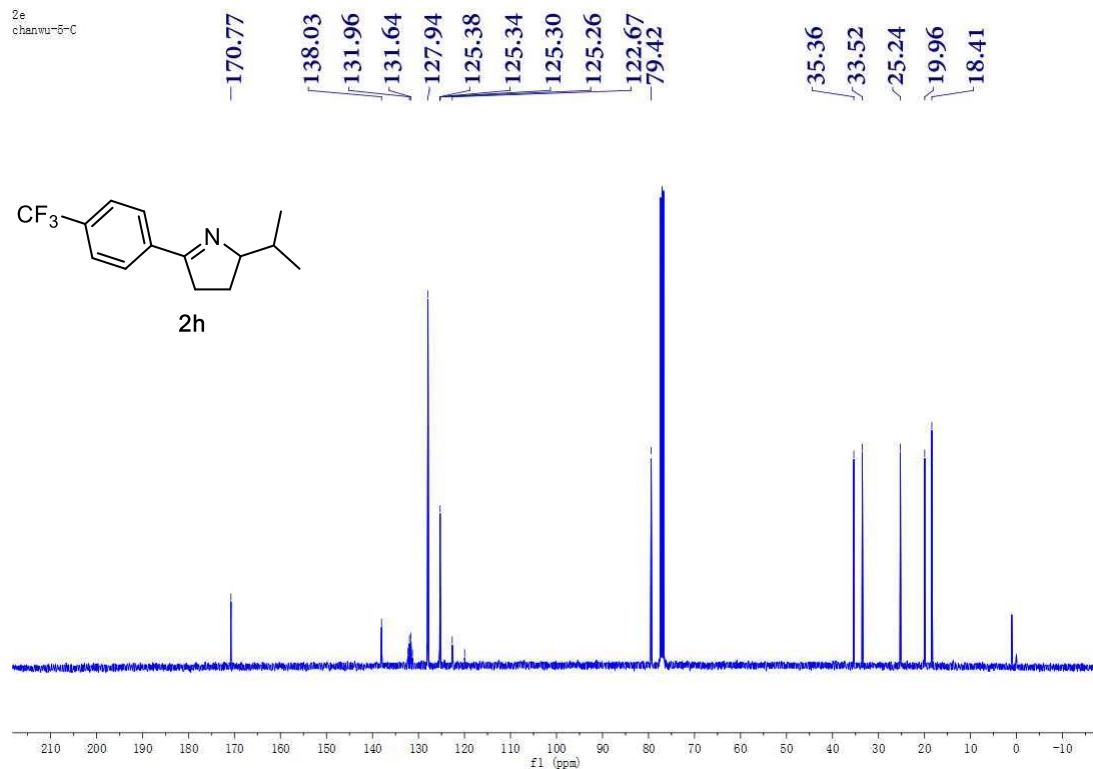

### <sup>19</sup>F NMR Spectrum of **2h** (376 MHz; CDCl<sub>3</sub>)

1h  
1h-F

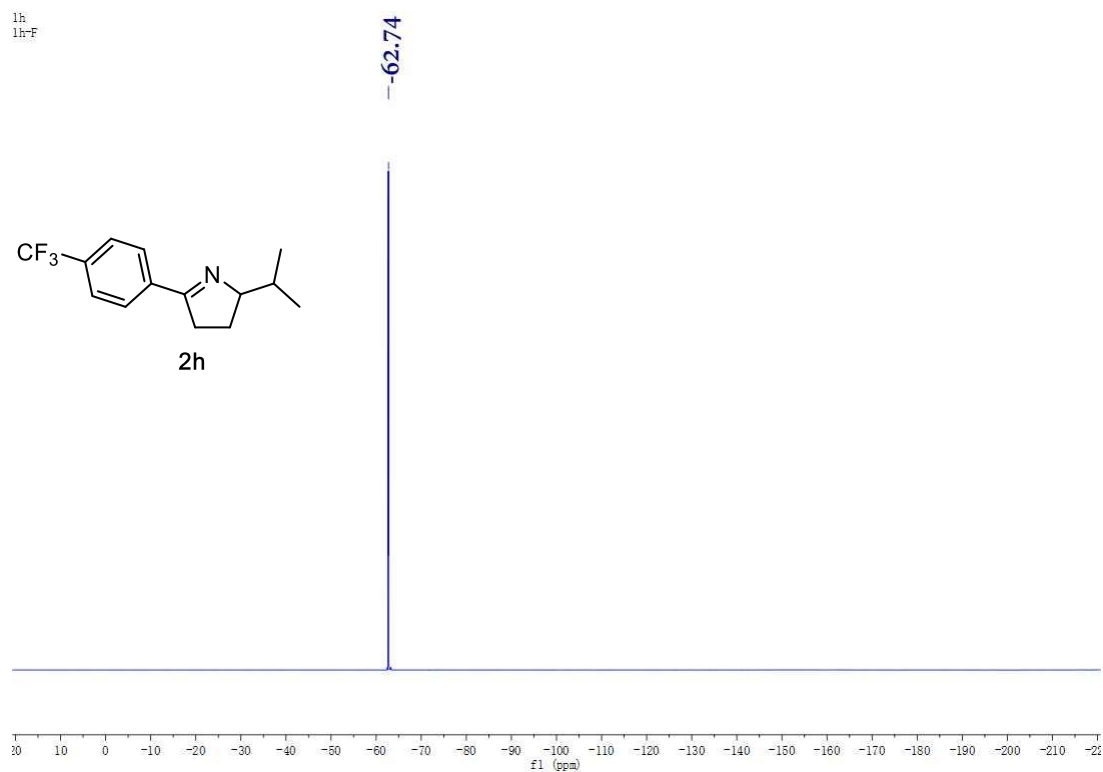

### $^1\text{H}$ NMR Spectrum of **2i** (400 MHz; $\text{CDCl}_3$ )

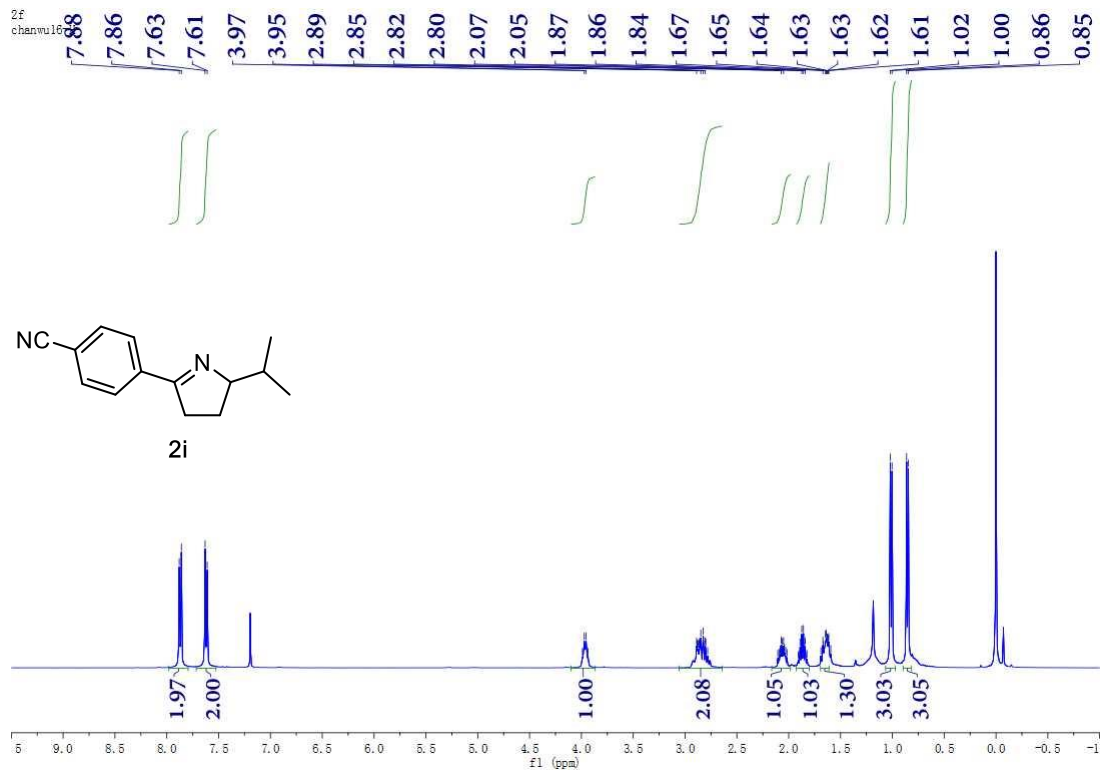

### $^{13}\text{C}$ NMR Spectrum of **2i** (100 MHz; $\text{CDCl}_3$ )

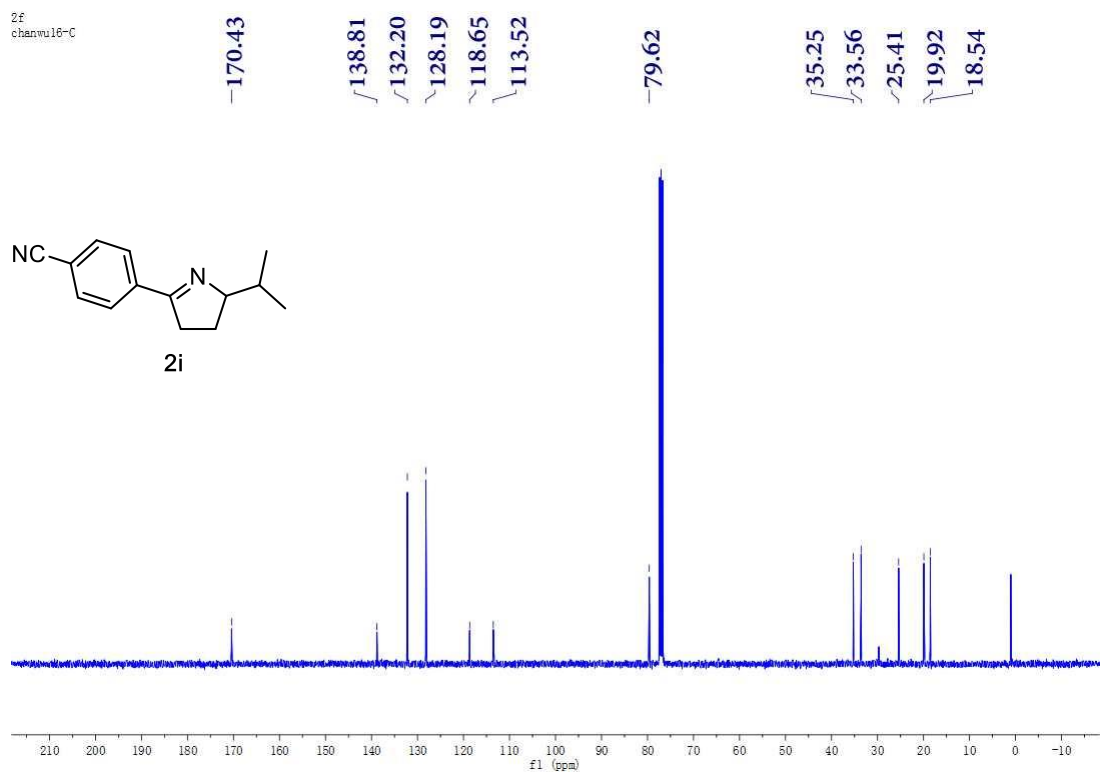

<sup>1</sup>H NMR Spectrum of **2j** (400 MHz; CDCl<sub>3</sub>)

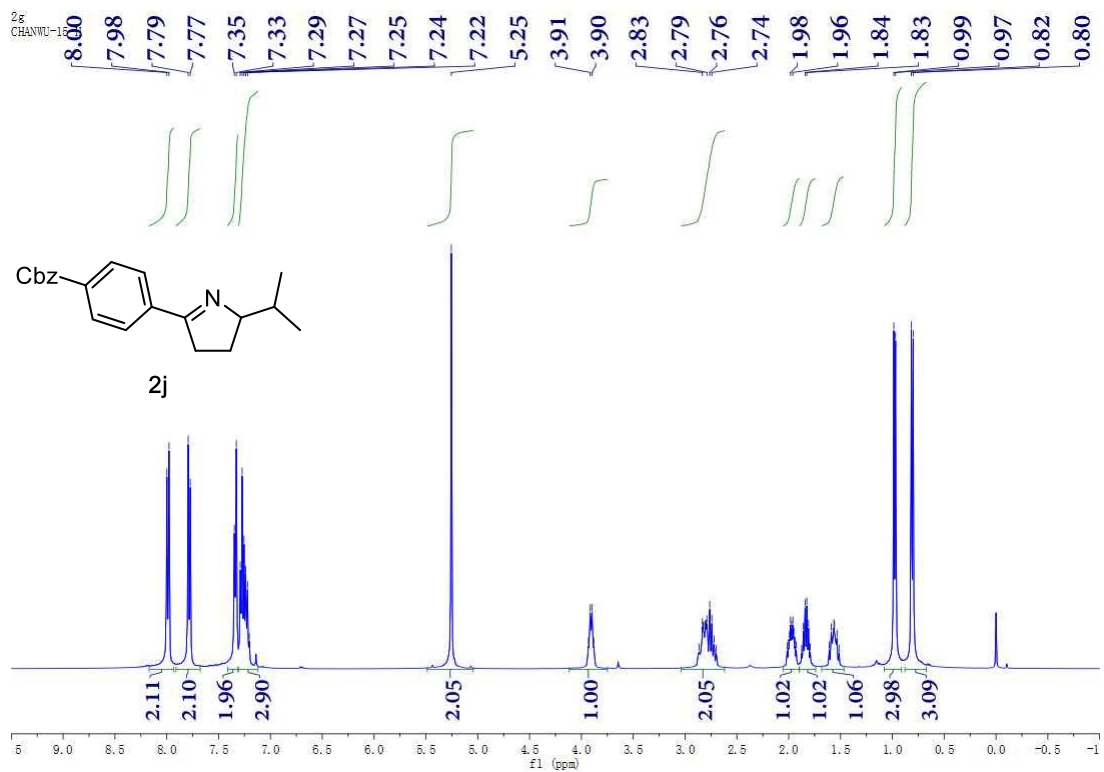

<sup>13</sup>C NMR Spectrum of **2j** (100 MHz; CDCl<sub>3</sub>)

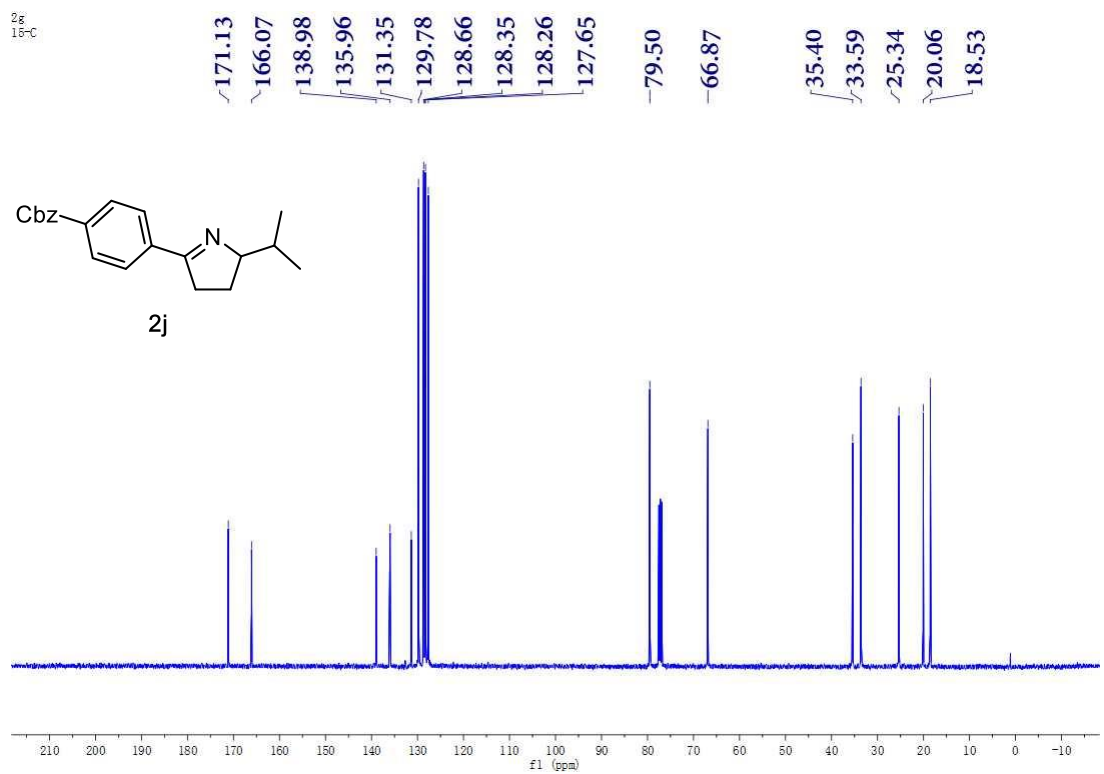

<sup>1</sup>H NMR Spectrum of **2k** (400 MHz; CDCl<sub>3</sub>)

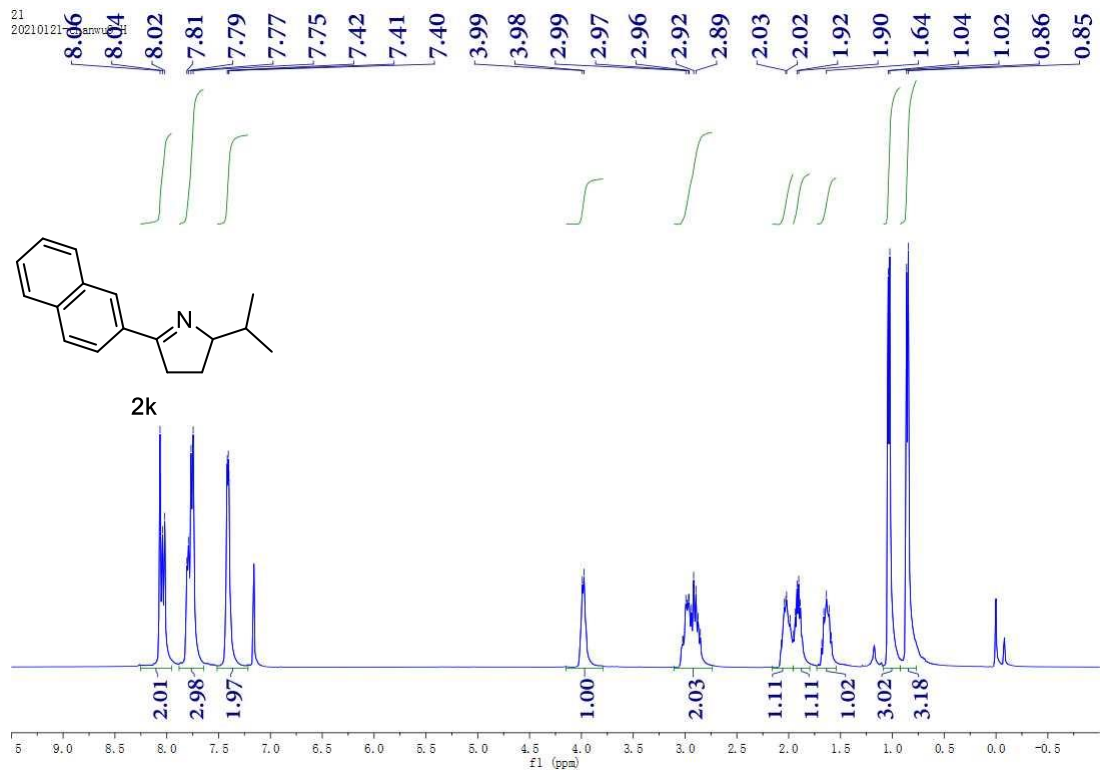

<sup>13</sup>C NMR Spectrum of **2k** (100 MHz; CDCl<sub>3</sub>)

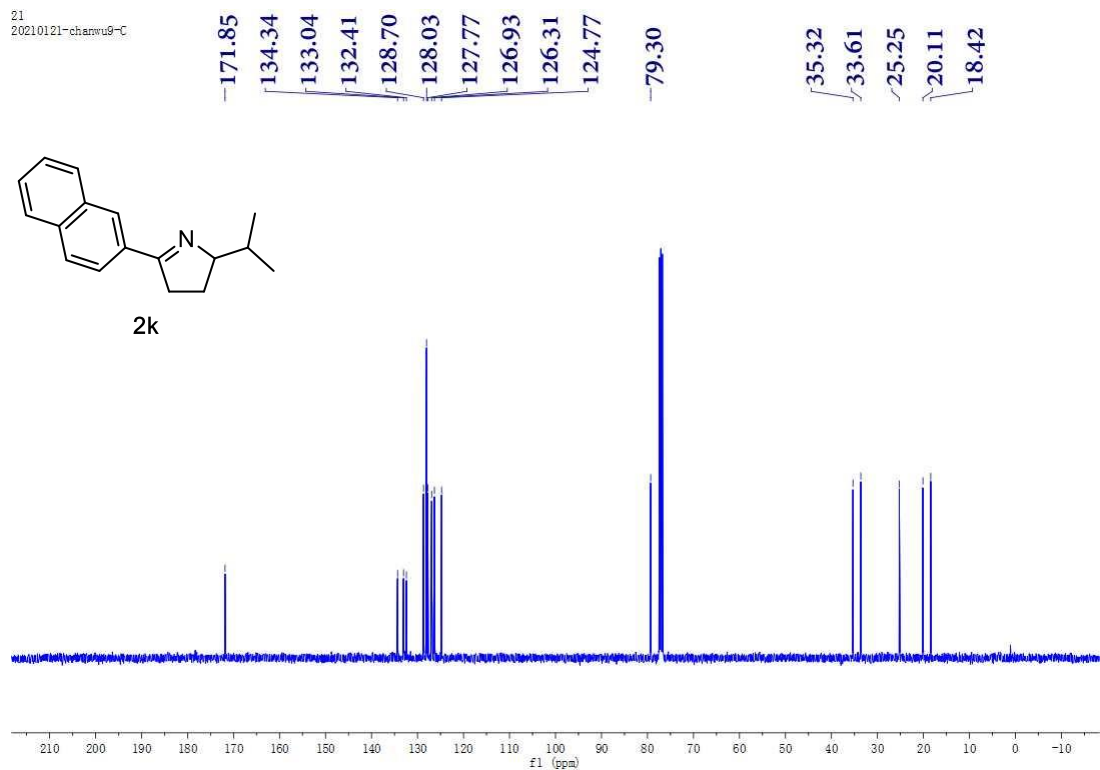

# $^1\text{H}$ NMR Spectrum of **21** (400 MHz; $\text{CDCl}_3$ )

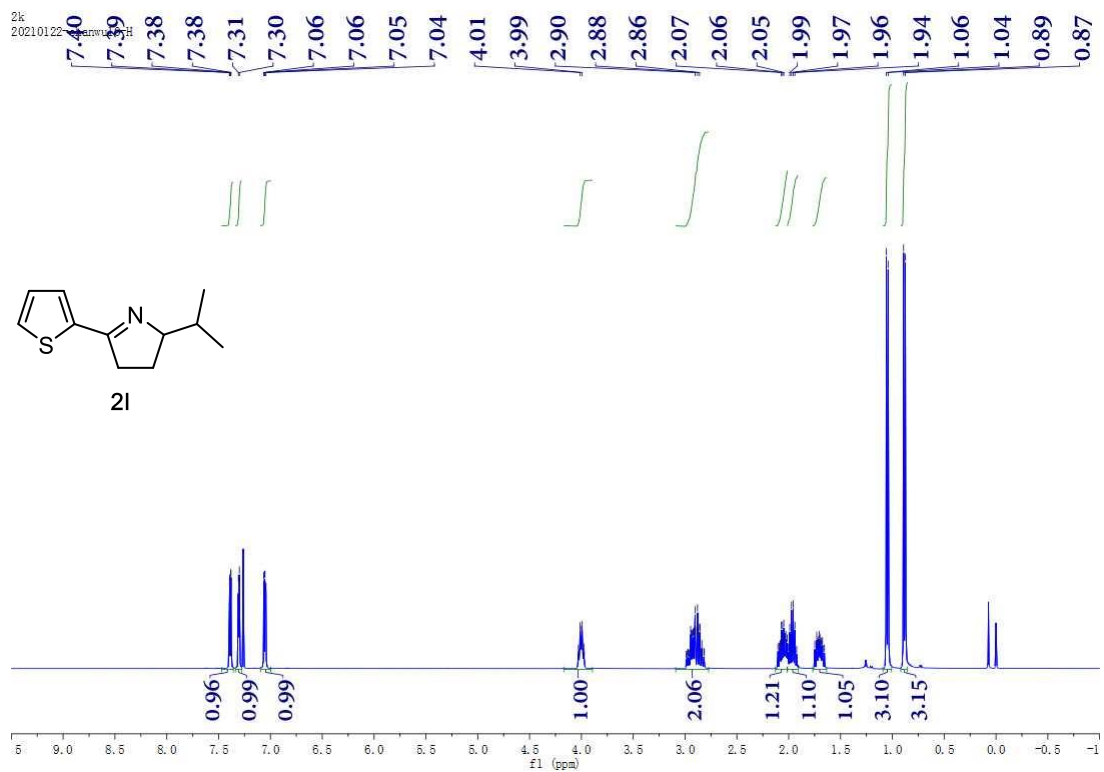

# $^{13}\text{C}$ NMR Spectrum of **21** (100 MHz; $\text{CDCl}_3$ )

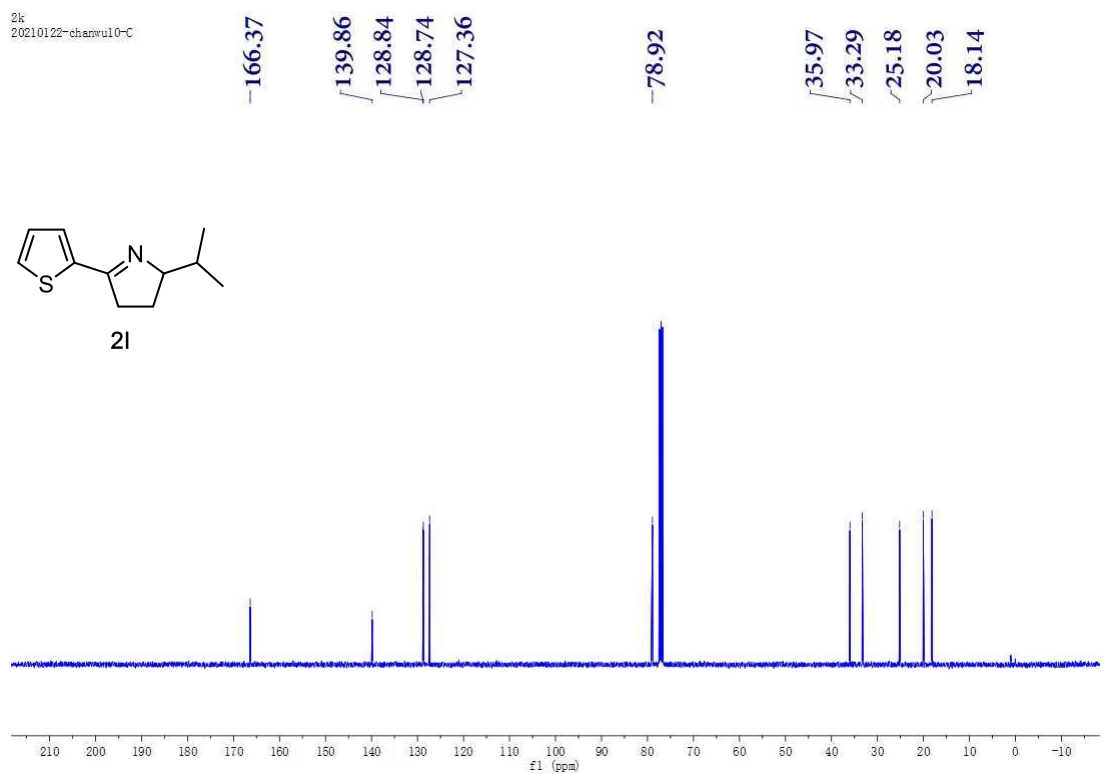

### $^1\text{H}$ NMR Spectrum of **2m** (400 MHz; $\text{CDCl}_3$ )

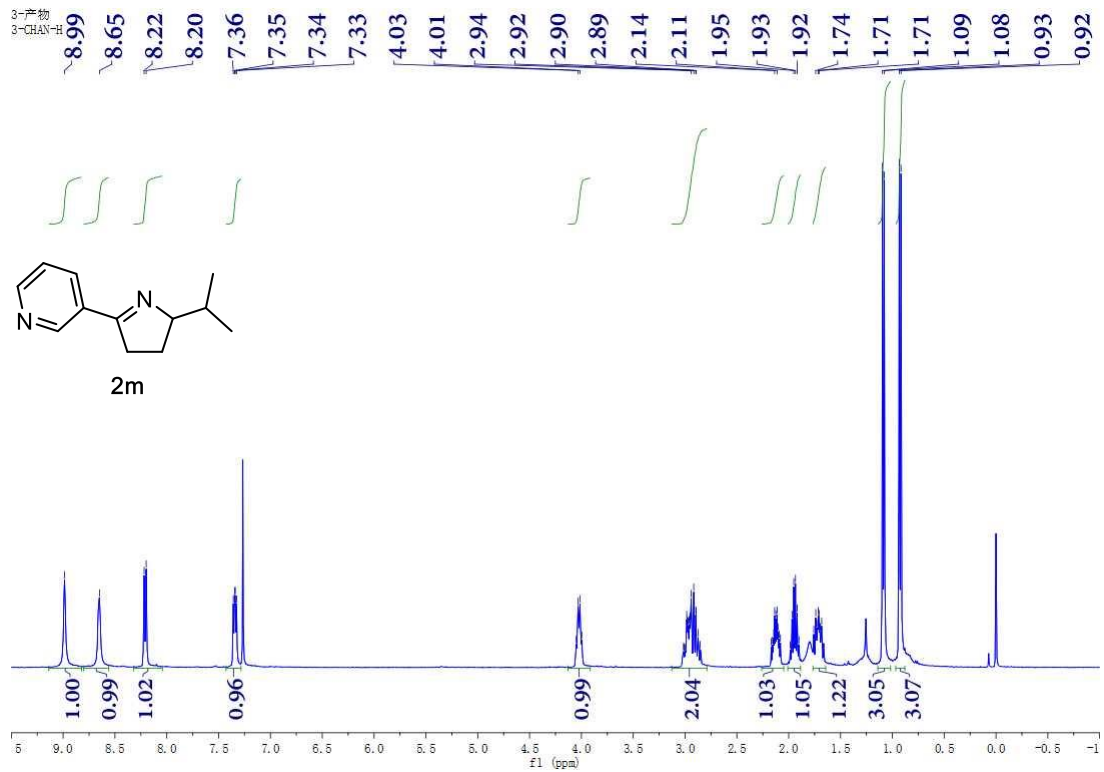

### $^{13}\text{C}$ NMR Spectrum of **2m** (100 MHz; $\text{CDCl}_3$ )

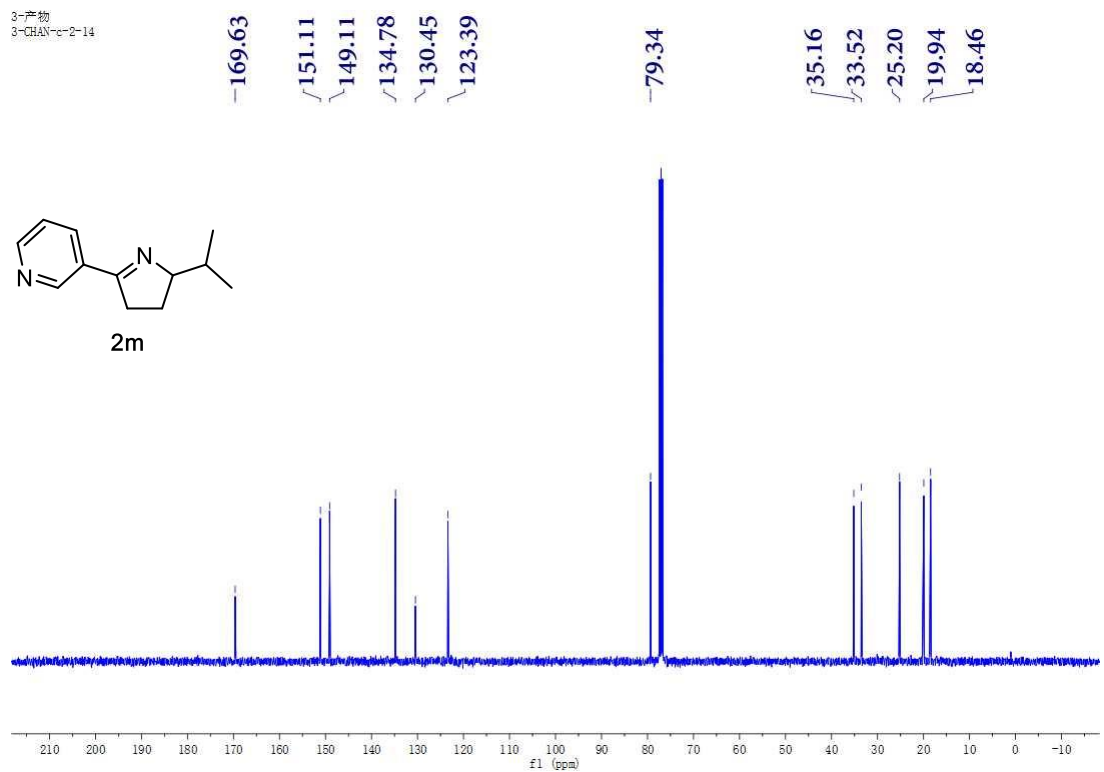

$^1\text{H}$  NMR Spectrum of **2n** (400 MHz;  $\text{CDCl}_3$ )

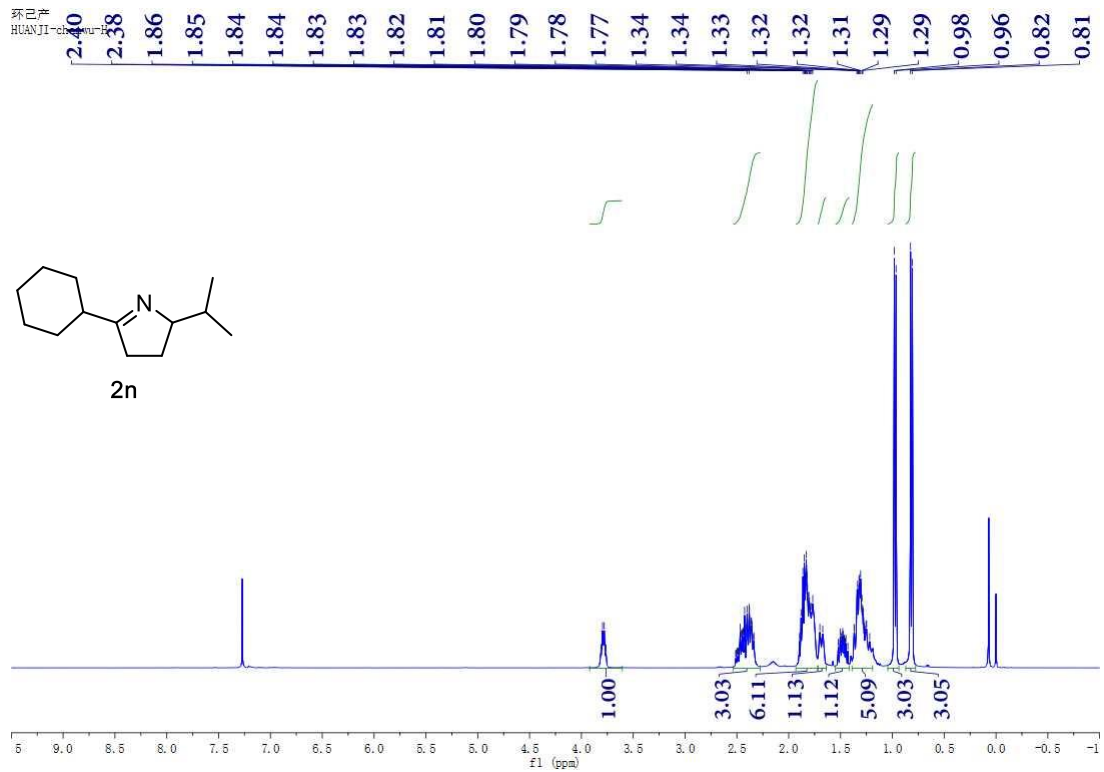

$^{13}\text{C}$  NMR Spectrum of **2n** (100 MHz;  $\text{CDCl}_3$ )

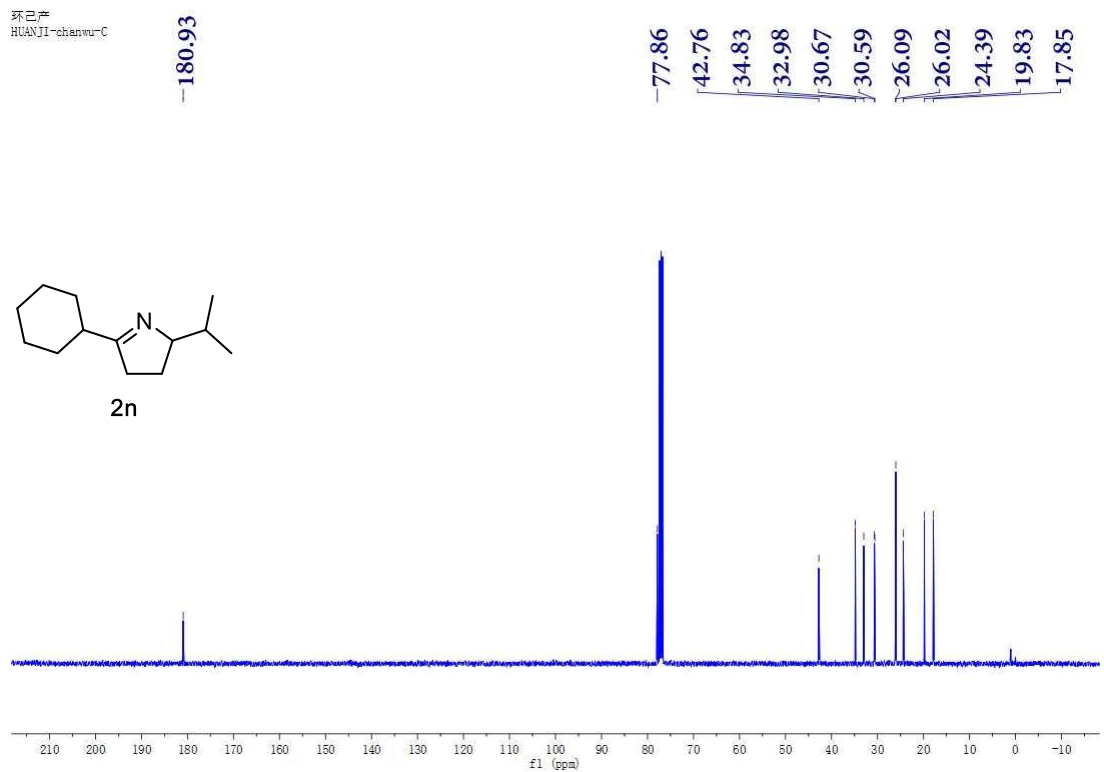

### <sup>1</sup>H NMR Spectrum of **2o** (400 MHz; CDCl<sub>3</sub>)

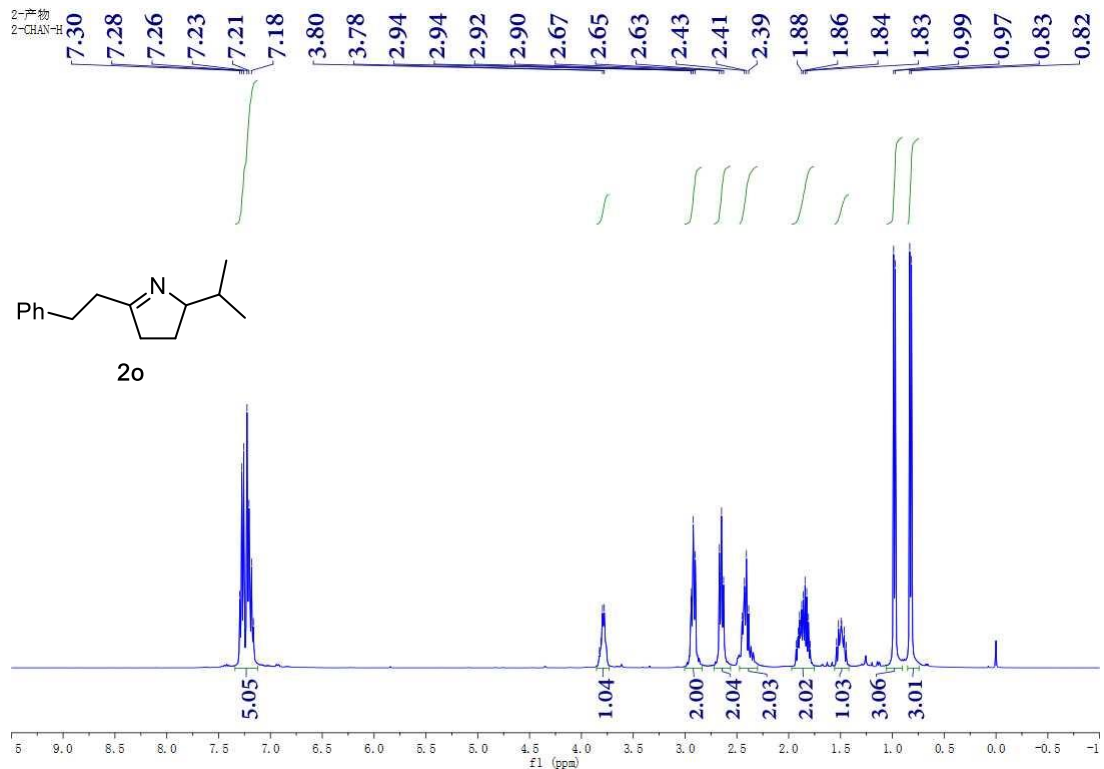

### <sup>13</sup>C NMR Spectrum of **2o** (100 MHz; CDCl<sub>3</sub>)

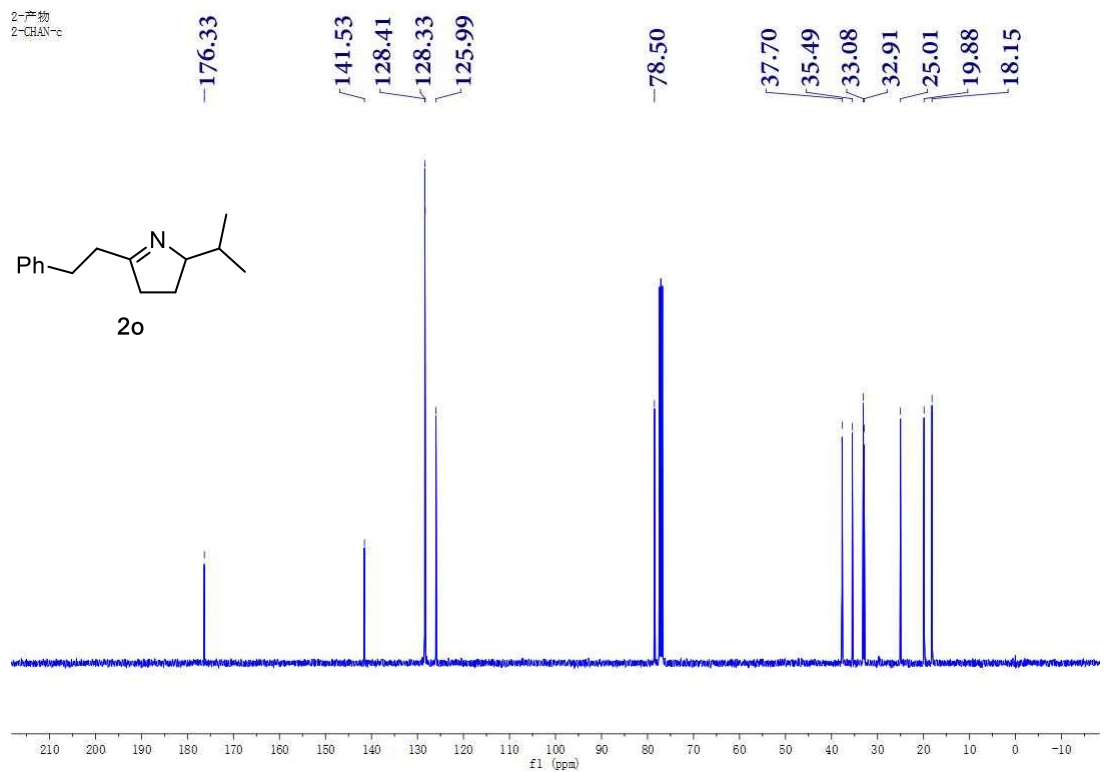



### $^1\text{H}$ NMR Spectrum of **2p** (400 MHz; $\text{CDCl}_3$ )

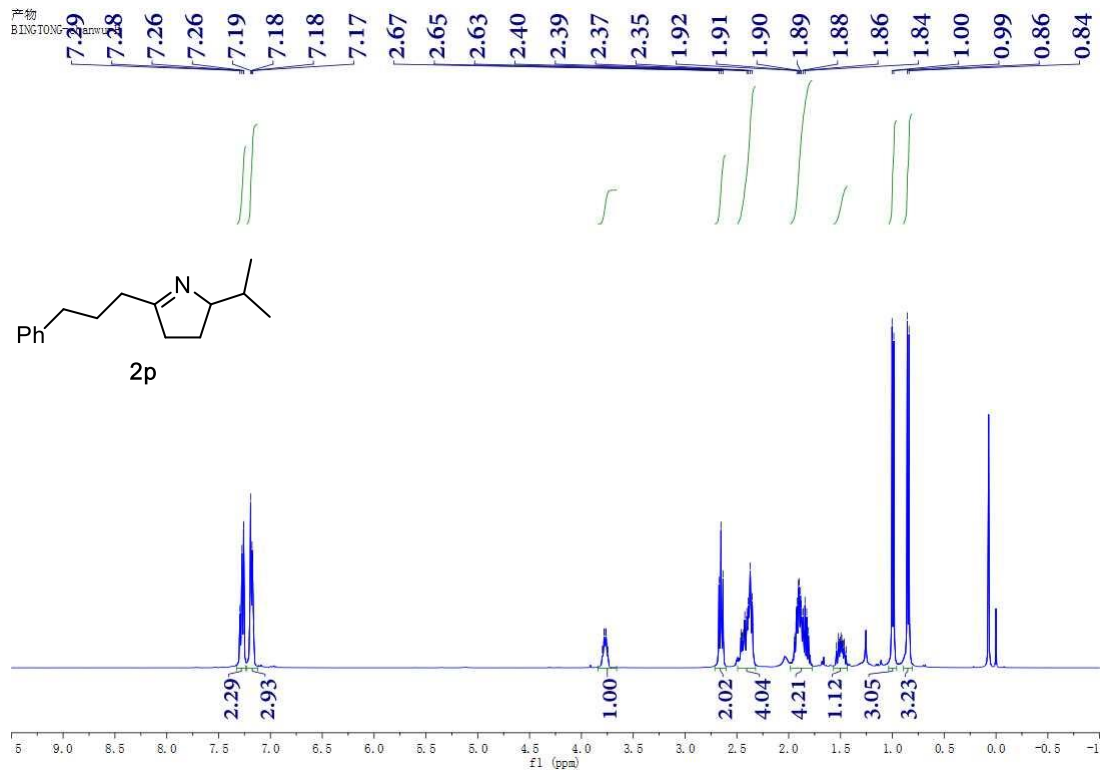

### $^{13}\text{C}$ NMR Spectrum of **2p** (100 MHz; $\text{CDCl}_3$ )

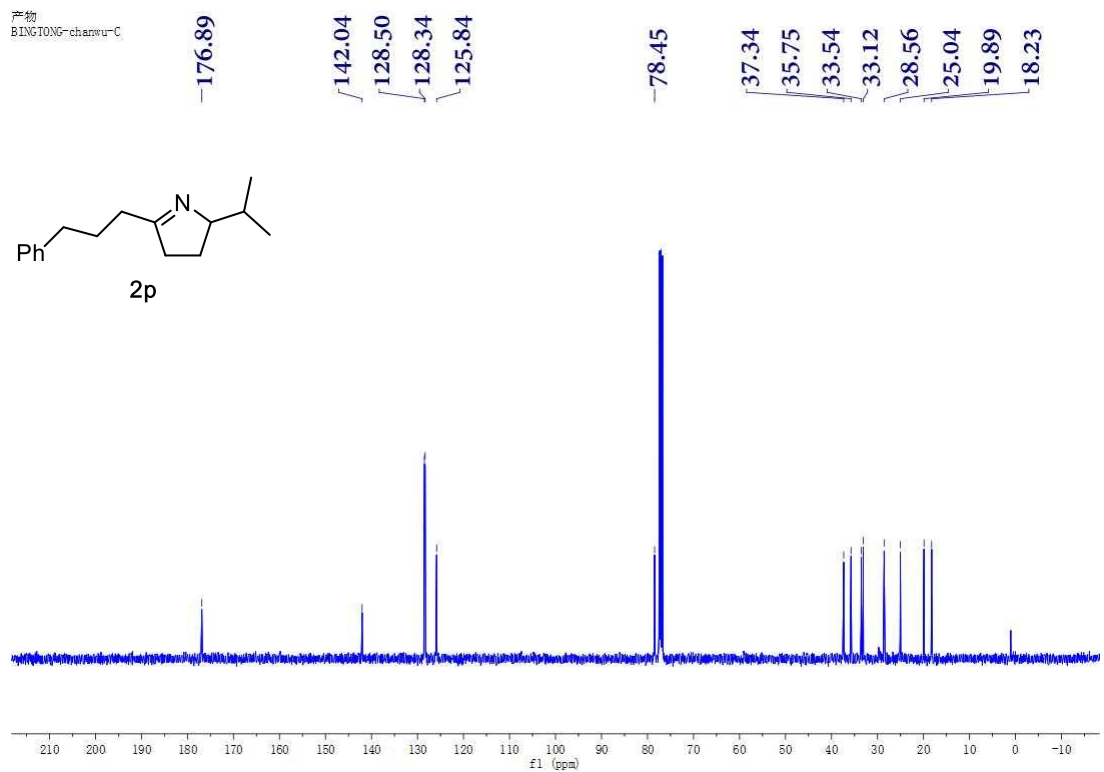

<sup>1</sup>H NMR Spectrum of **2q** (400 MHz; CDCl<sub>3</sub>)

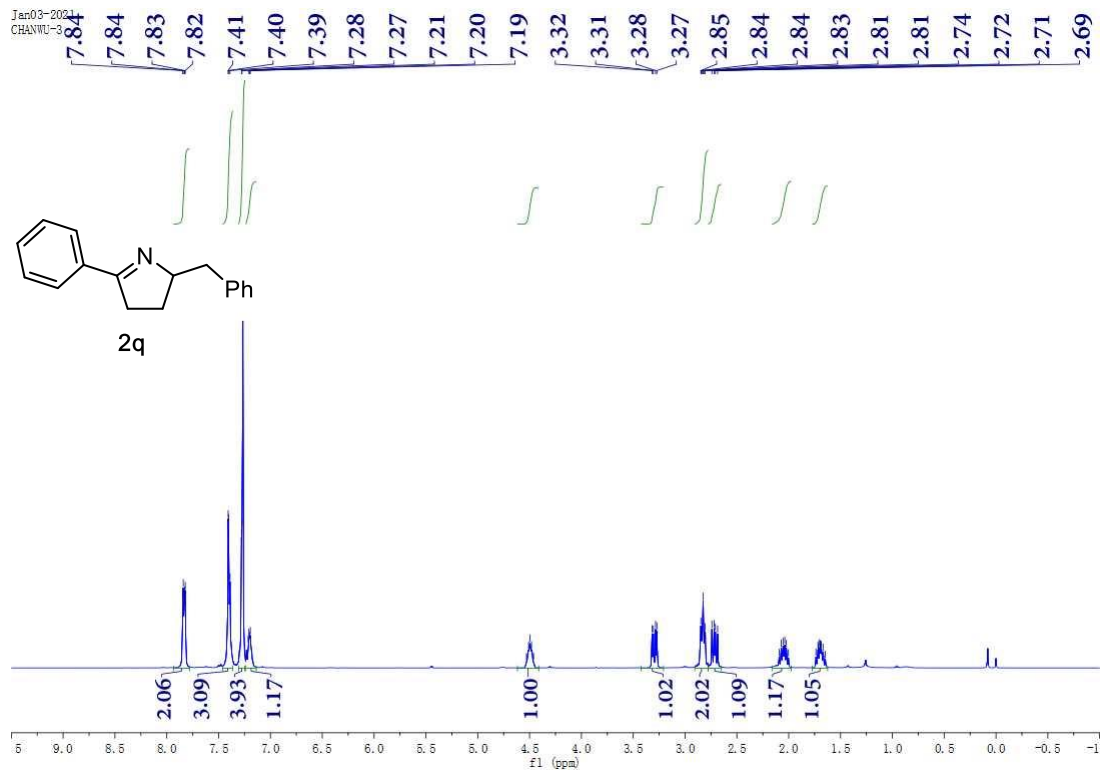

<sup>13</sup>C NMR Spectrum of **2q** (100 MHz; CDCl<sub>3</sub>)

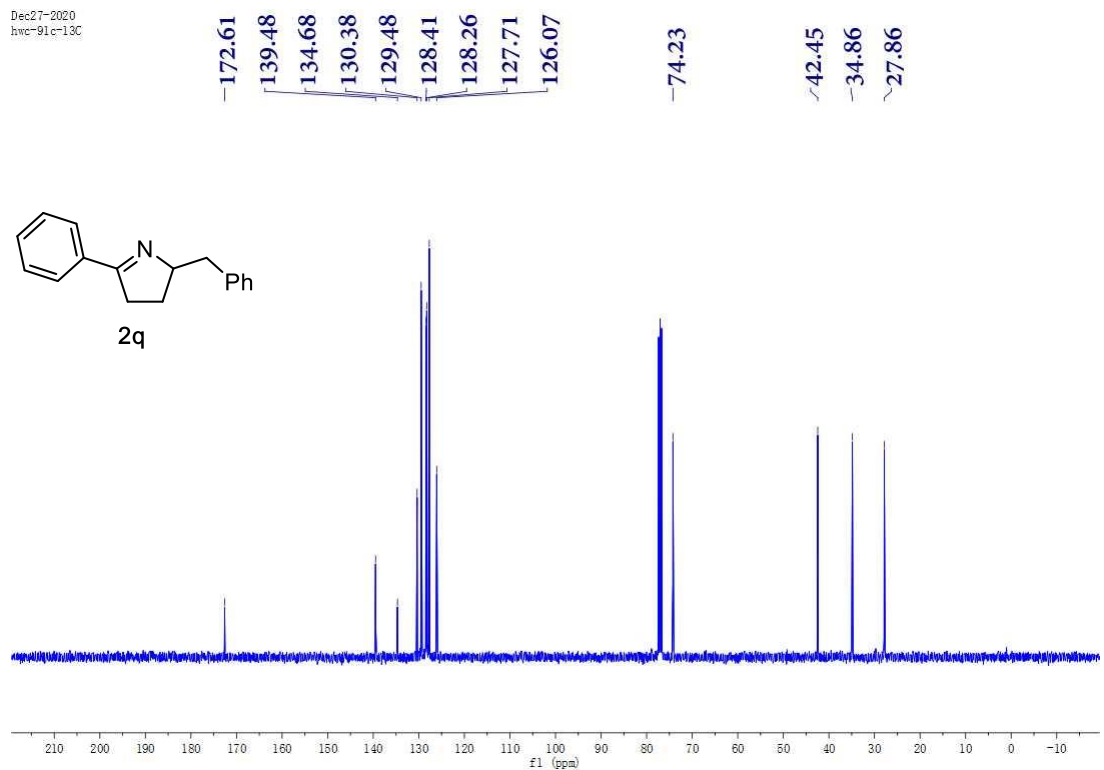

### $^1\text{H}$ NMR Spectrum of **2r** (400 MHz; $\text{CDCl}_3$ )

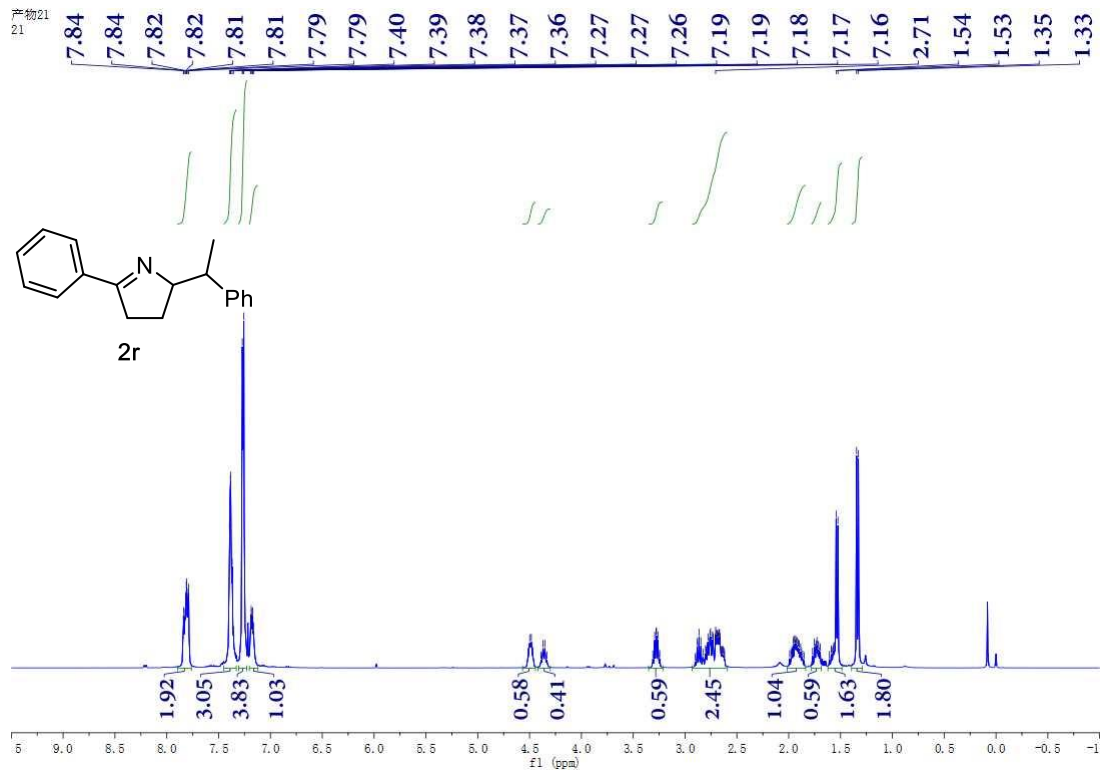

### $^{13}\text{C}$ NMR Spectrum of **2r** (100 MHz; $\text{CDCl}_3$ )

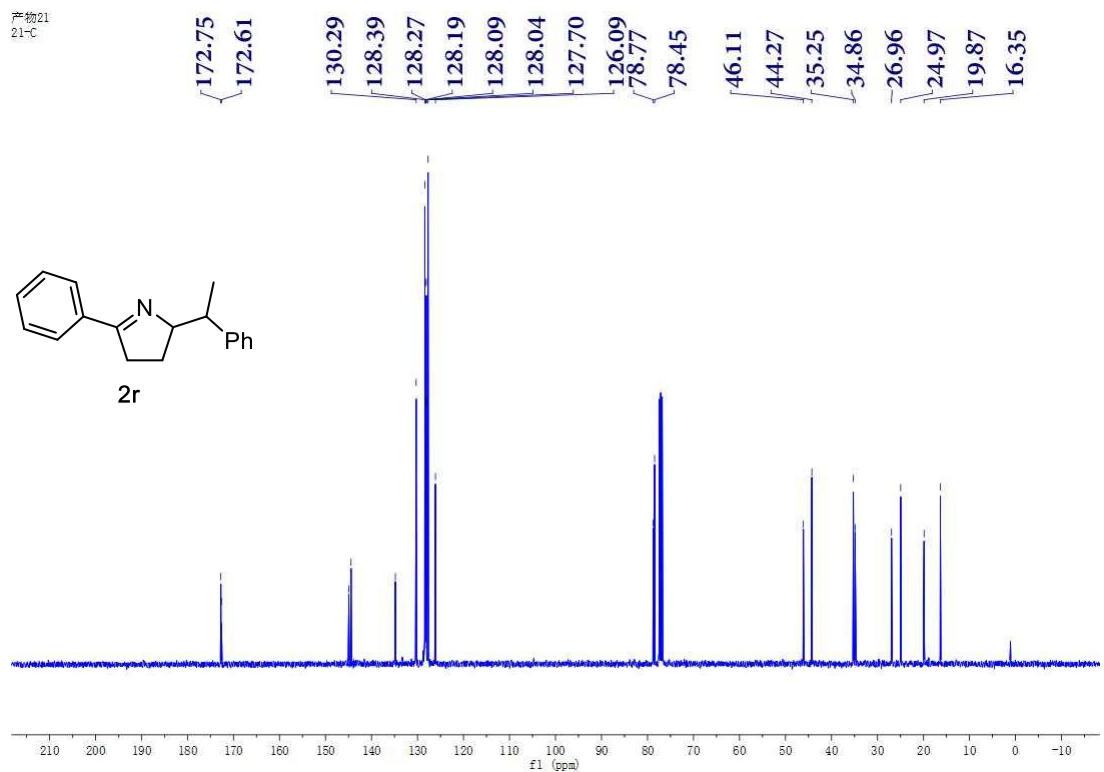

### <sup>1</sup>H NMR Spectrum of **2t** (400 MHz; CDCl<sub>3</sub>)

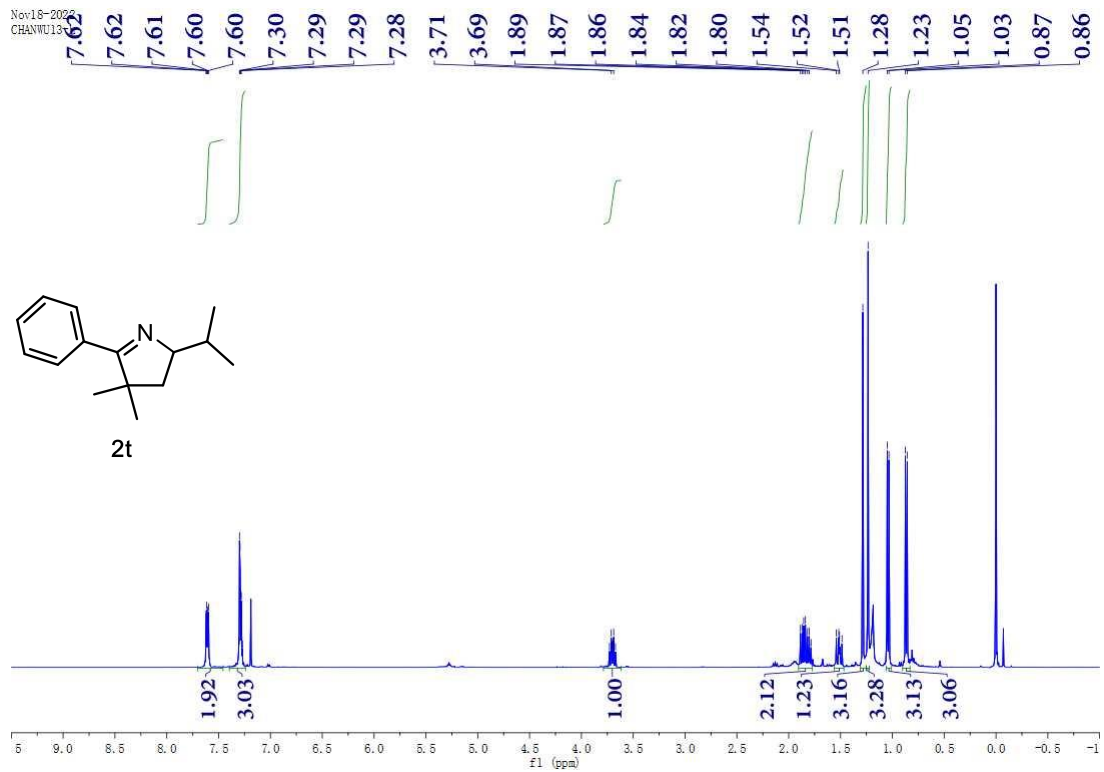

### <sup>13</sup>C NMR Spectrum of **2t** (100 MHz; CDCl<sub>3</sub>)

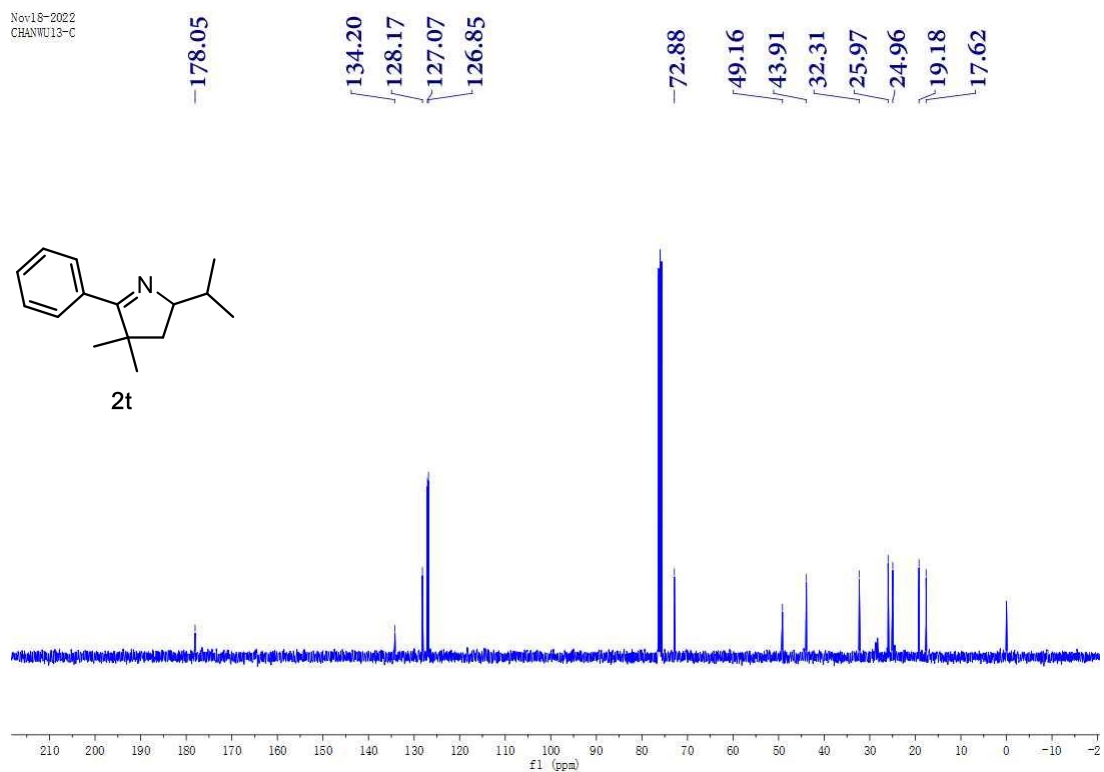

<sup>1</sup>H NMR Spectrum of **2u** (400 MHz; CDCl<sub>3</sub>)

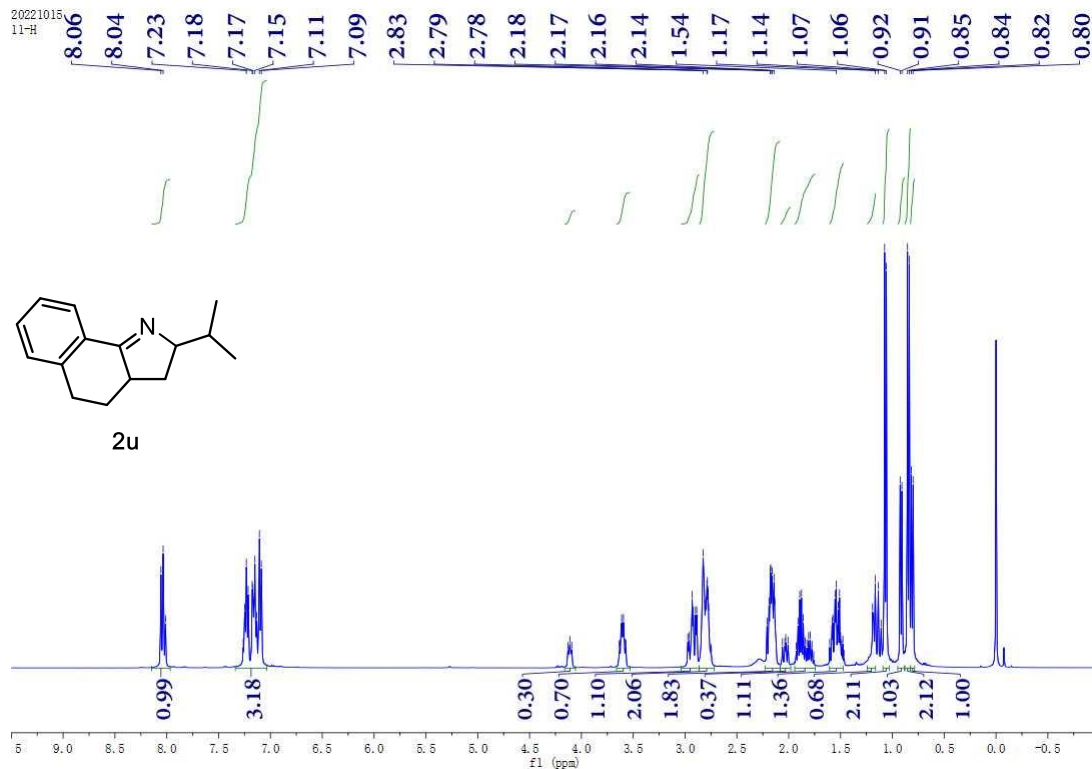

<sup>13</sup>C NMR Spectrum of **2u** (100 MHz; CDCl<sub>3</sub>)

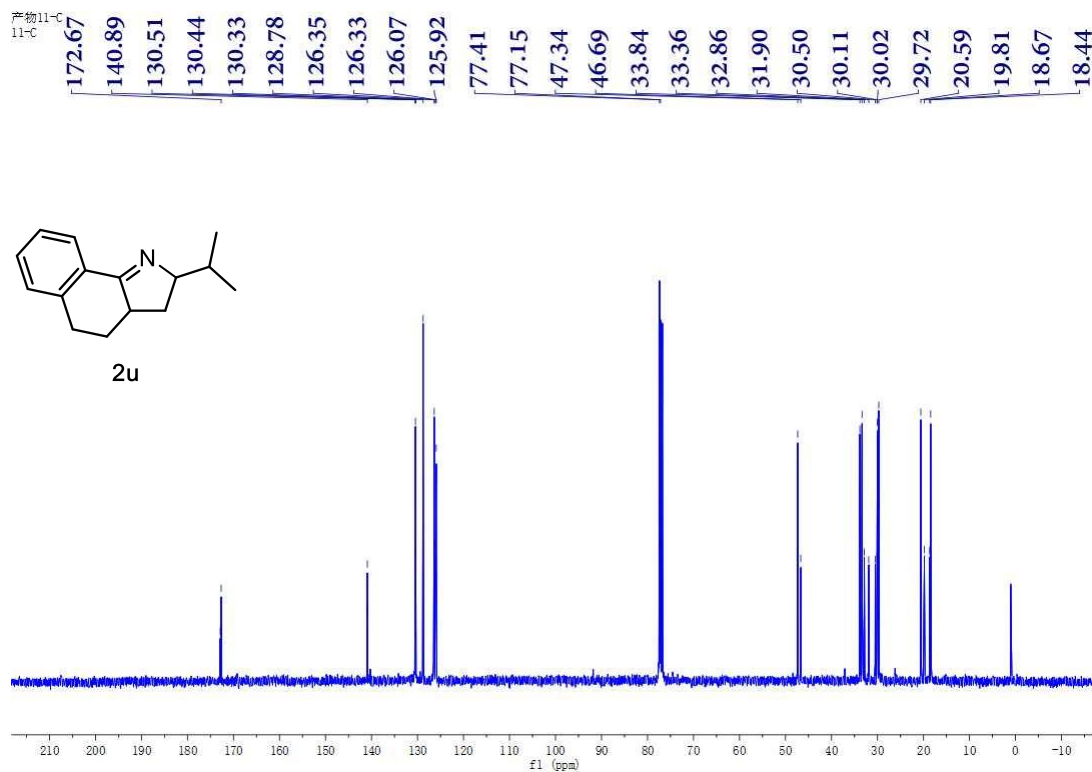

<sup>1</sup>H NMR Spectrum of **2v** (400 MHz; CDCl<sub>3</sub>)

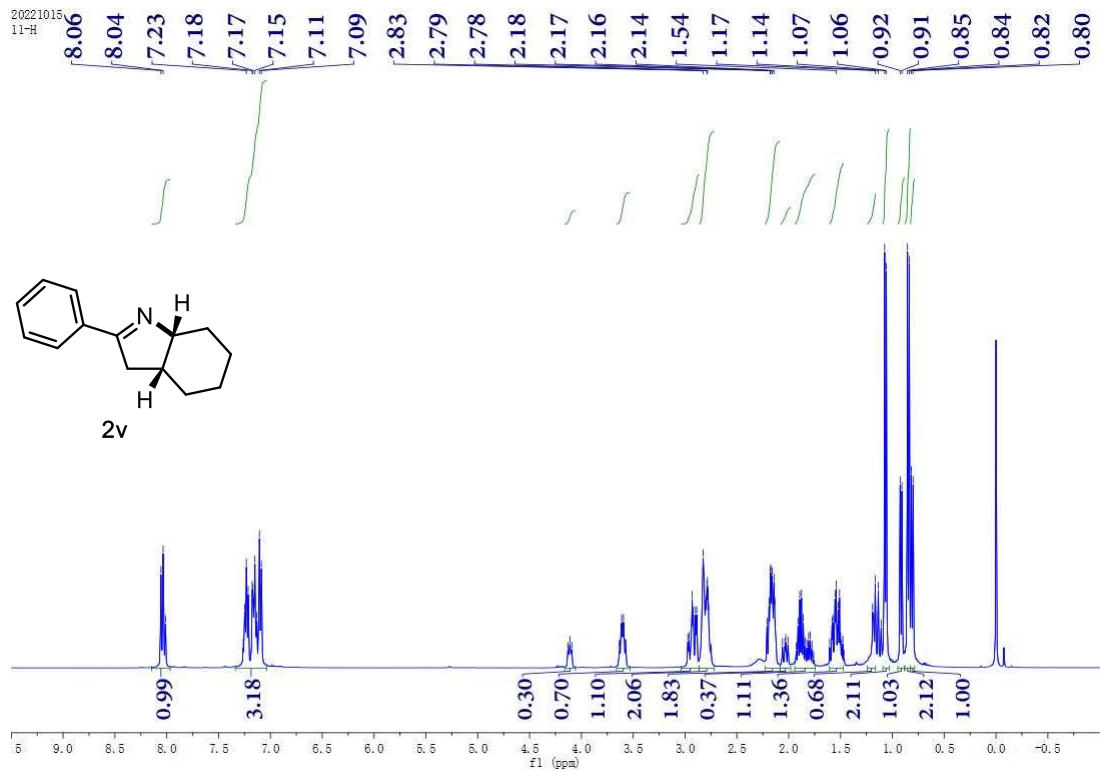

<sup>13</sup>C NMR Spectrum of **2v** (100 MHz; CDCl<sub>3</sub>)

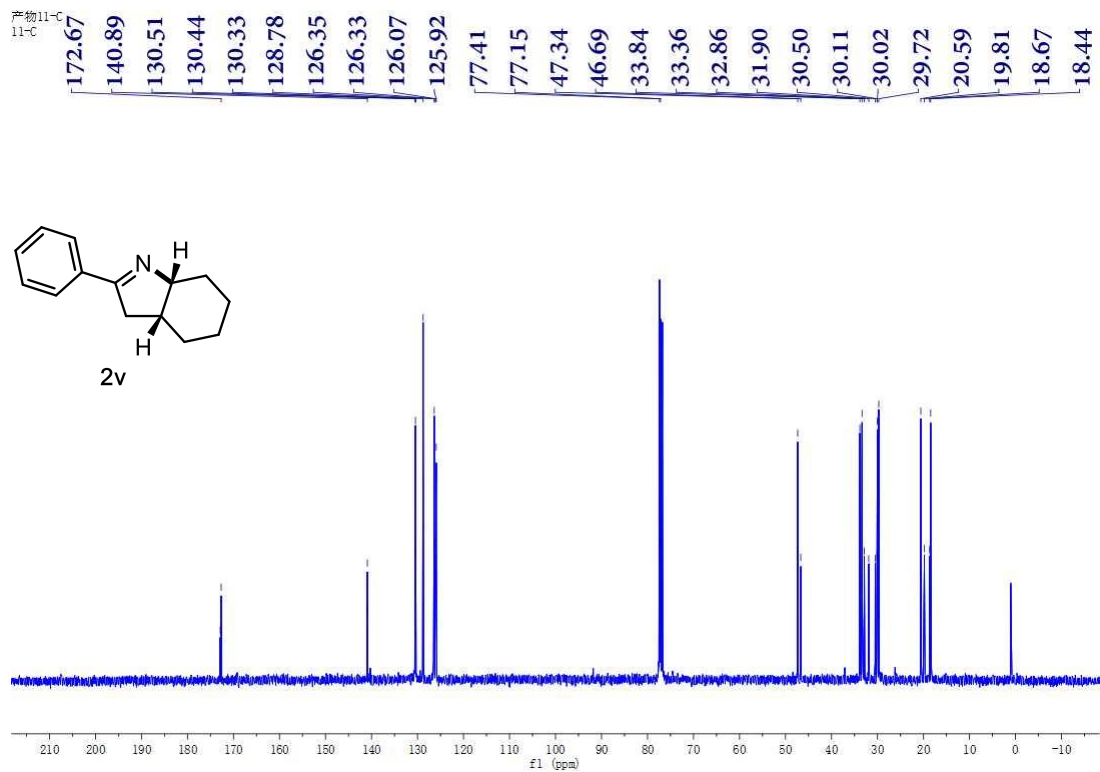

### <sup>1</sup>H NMR Spectrum of **2w** (400 MHz; CDCl<sub>3</sub>)

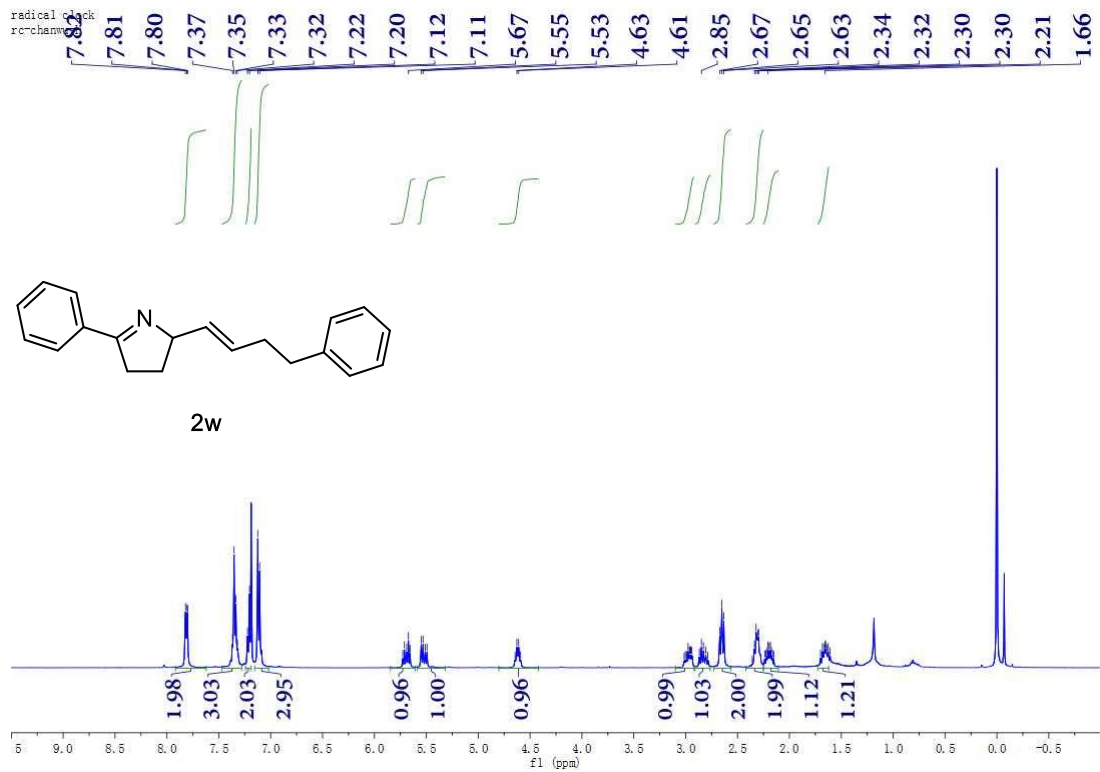

### <sup>13</sup>C NMR Spectrum of **2w** (100 MHz; CDCl<sub>3</sub>)

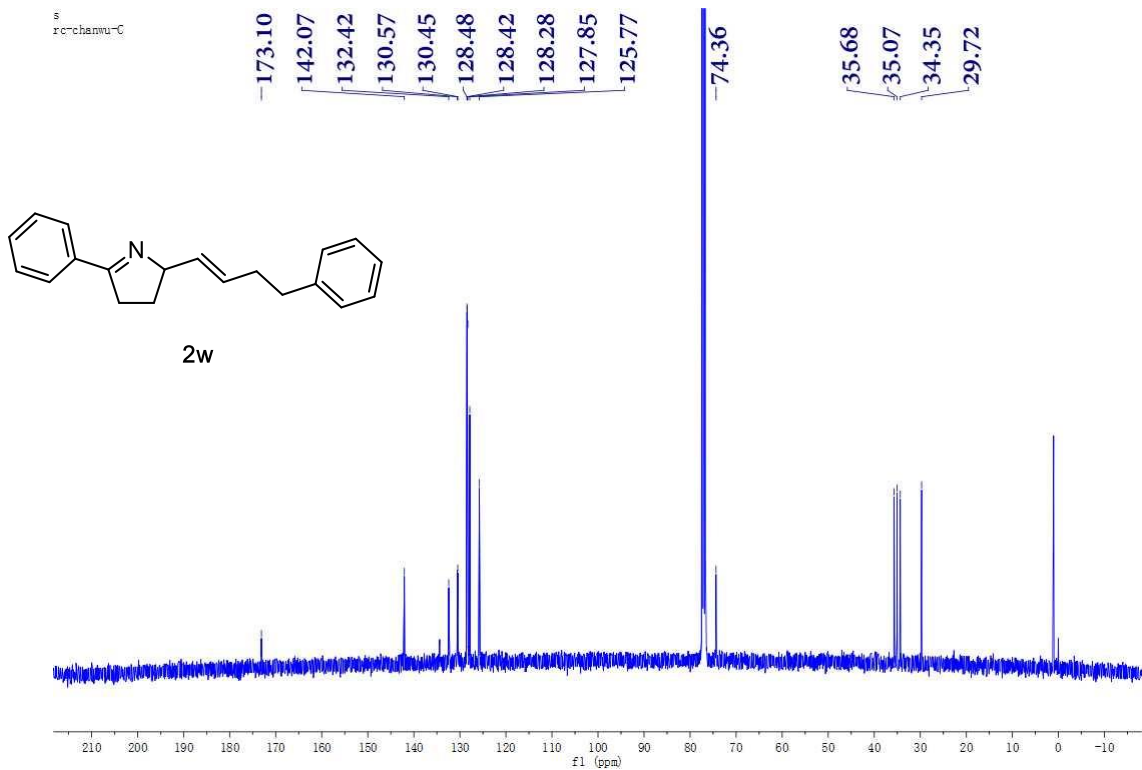

<sup>1</sup>H NMR Spectrum of **3** (400 MHz; CDCl<sub>3</sub>)

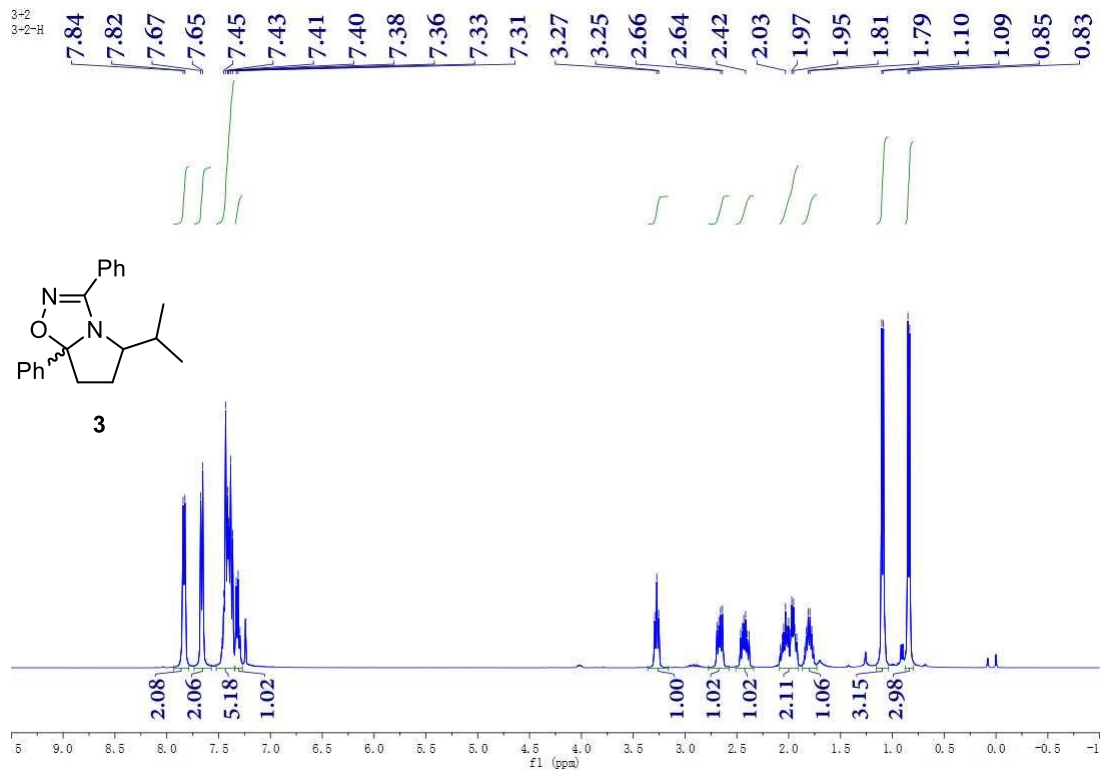

<sup>13</sup>C NMR Spectrum of **3** (100 MHz; CDCl<sub>3</sub>)

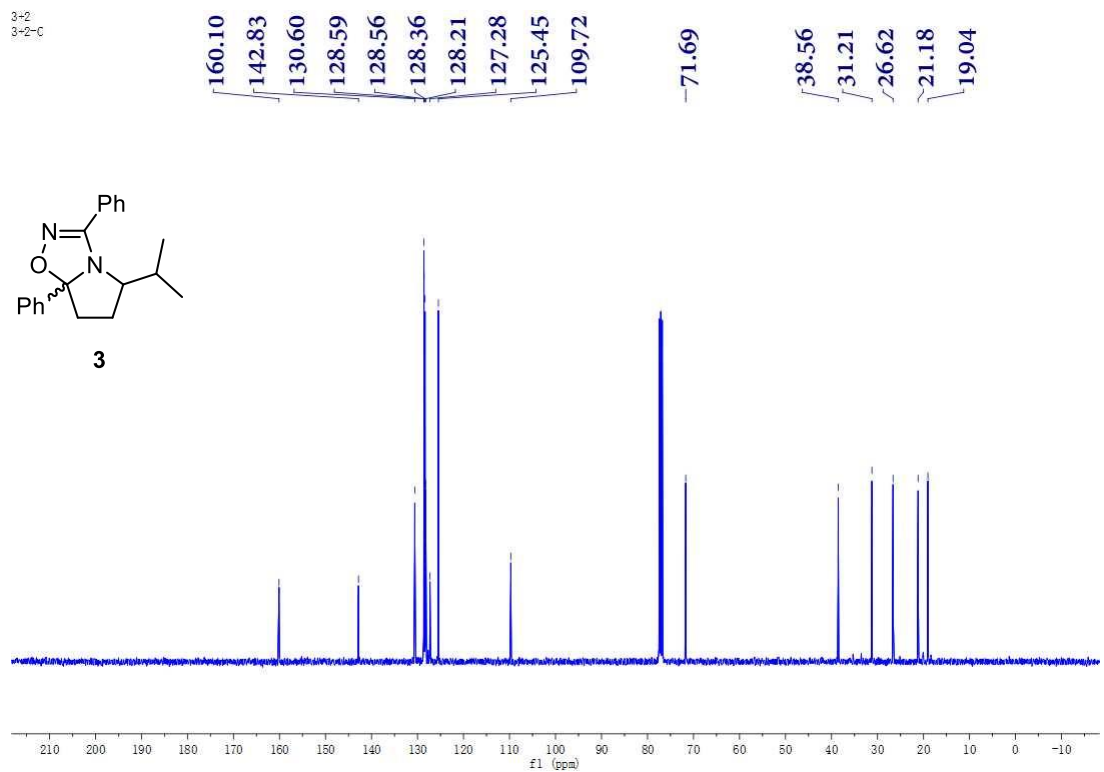



### <sup>1</sup>H NMR Spectrum of **4** (400 MHz; CDCl<sub>3</sub>)

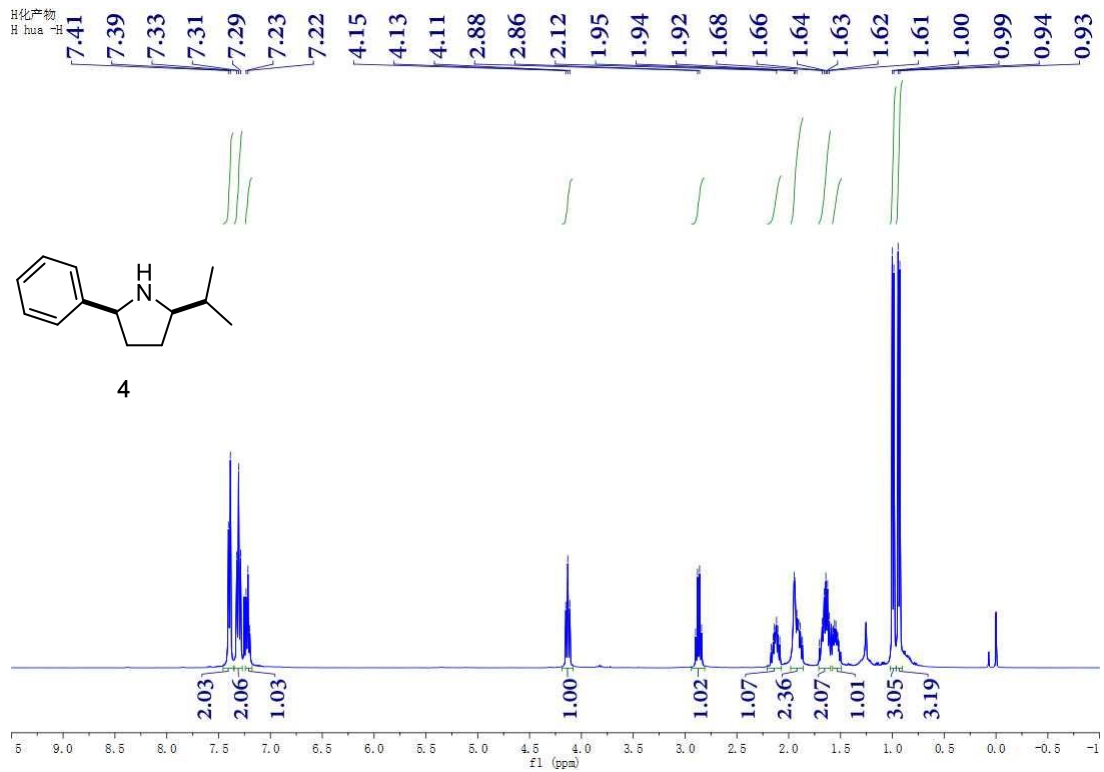

### <sup>13</sup>C NMR Spectrum of **4** (100 MHz; CDCl<sub>3</sub>)

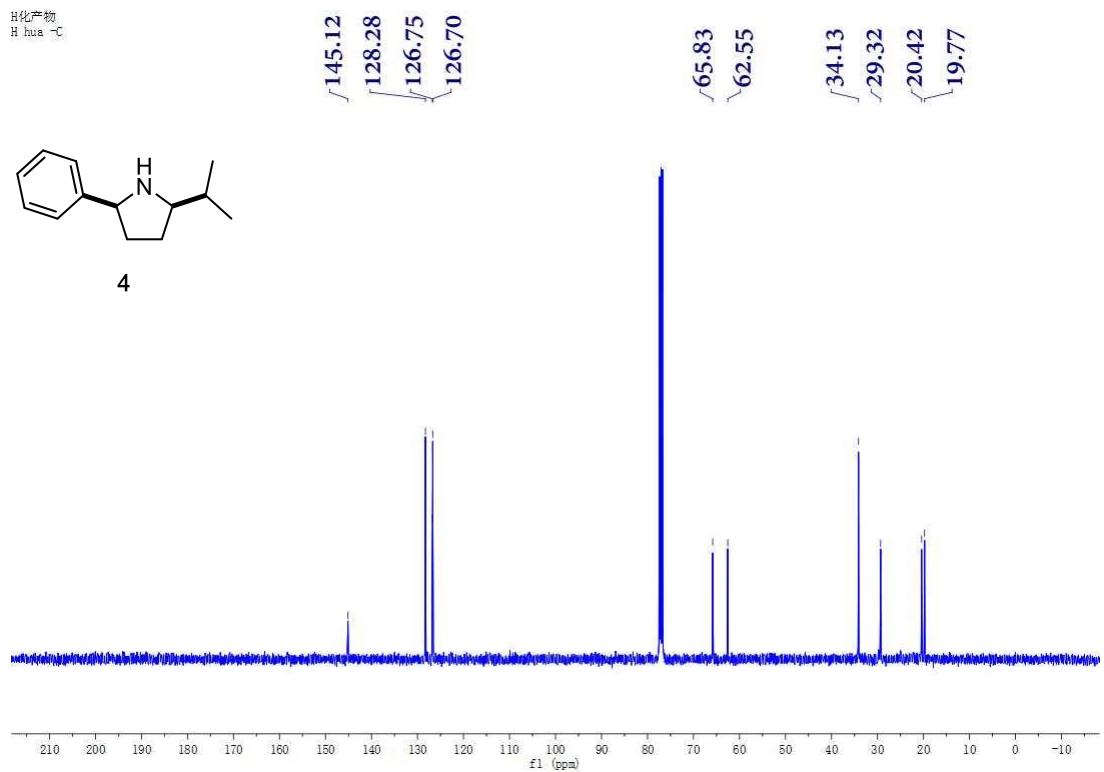

Supplement: d3ob00072a1.pdf [file d3ob00072a1.pdf]
